# Supplementary material
Source: bioRxiv or medRxiv preprint supplement (https://www.biorxiv.org/highwire/filestream/77485/field_highwire_adjunct_files/0/246900-1.pdf)
Supplement: Supplementary file [file 246900-1.pdf]

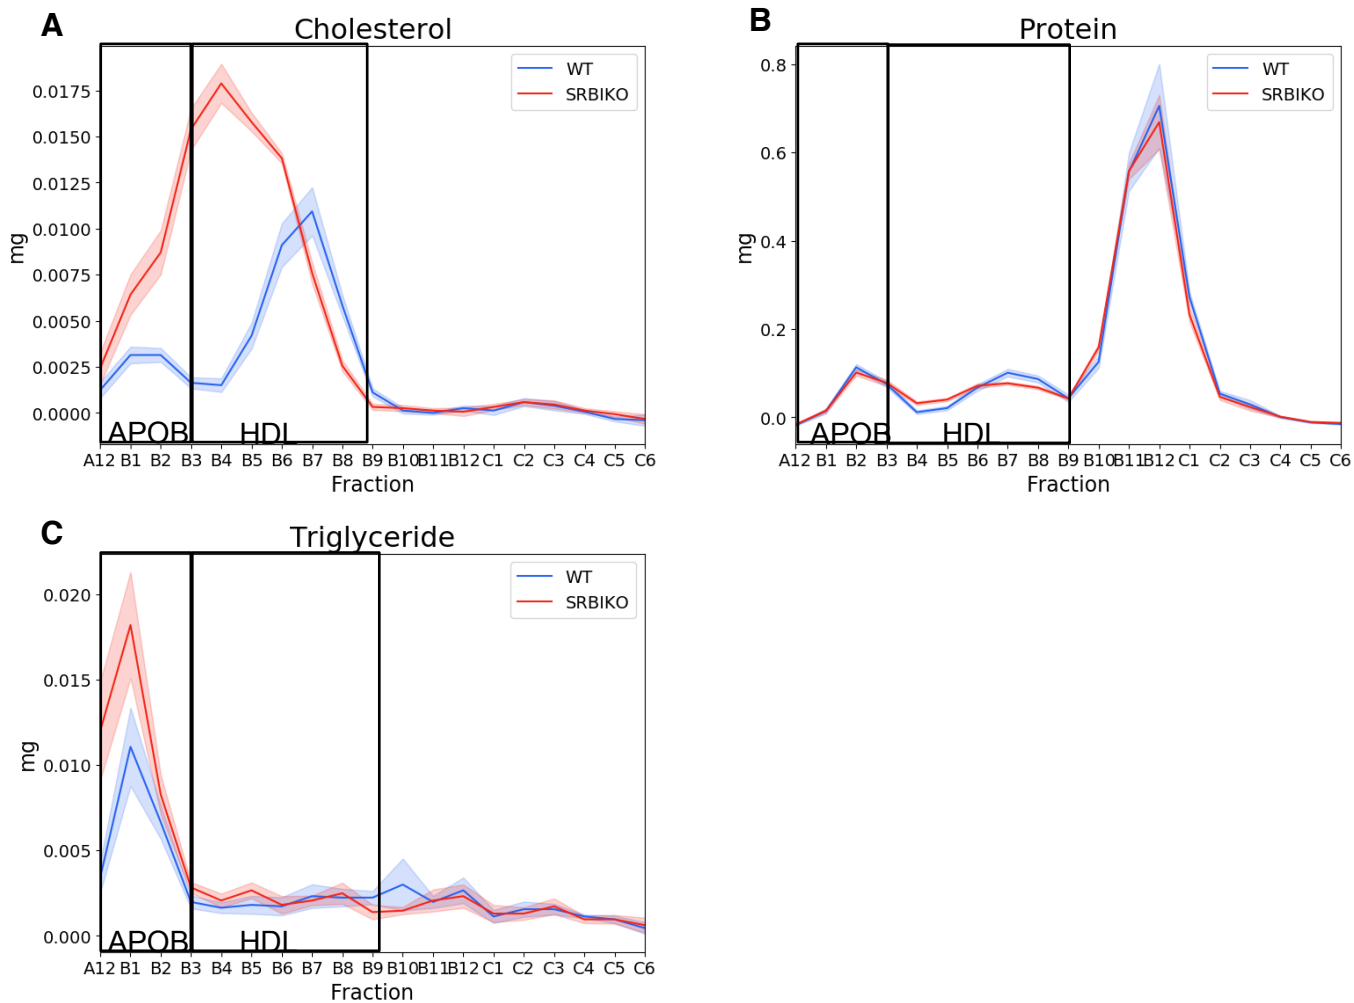

**Figure 1-Figure Supplement 1. Distribution of cholesterol, protein, and triglycerides across size-exclusion fractions. (A-C)** Colorimetric assays for **(A)** total cholesterol, **(B)** total protein, and **(C)** triglycerides. ). Wild-type, WT (blue); Scavenger receptor BI Knockout mice (*Scarb1<sup>-/-</sup>*), SR-BI KO (red). Size-exclusion chromatography fractions used to isolate HDL and APOB particles. mg, milligrams. HDL WT, N=7; HDL SR-BI KO N=7; APOB WT, N=7, APOB SR-BI KO N=7; Liver WT, N=7; Liver SR-BI KO, N=7; Bile WT, N=7; Bile SR-BI KO, N=6; Urine WT, N=5; Urine SR-BI KO, N=6.

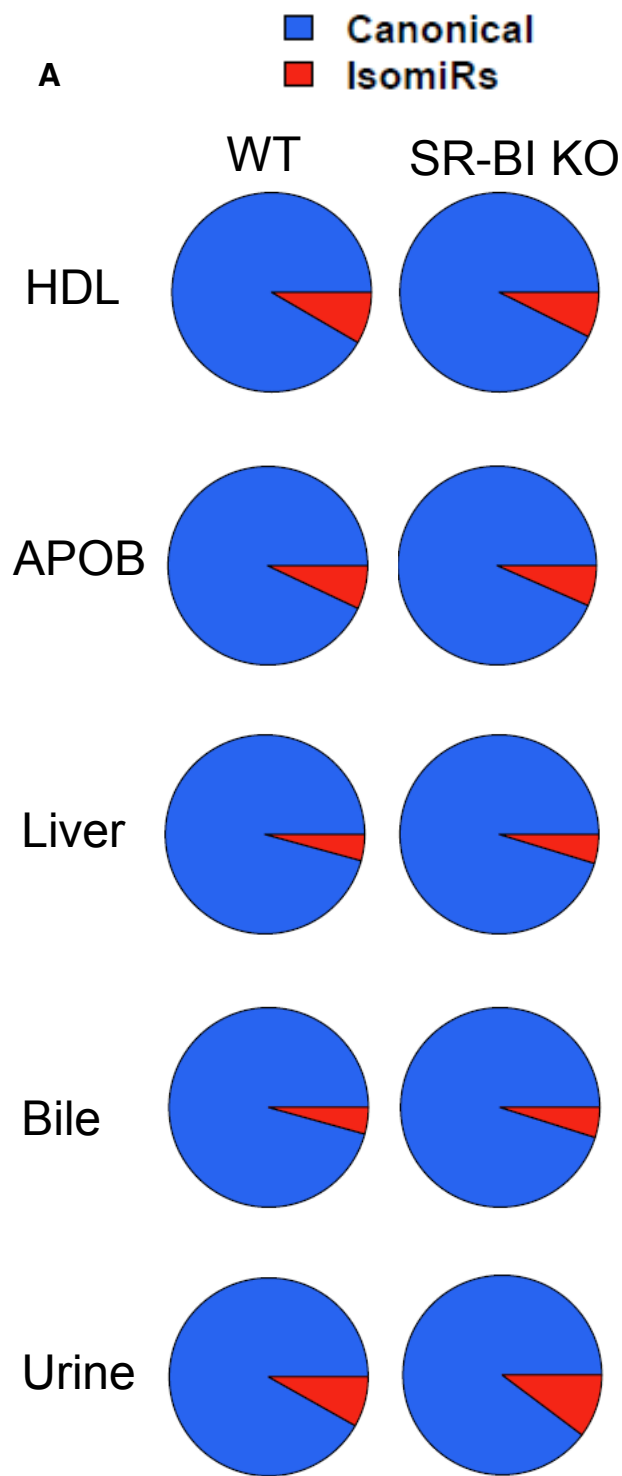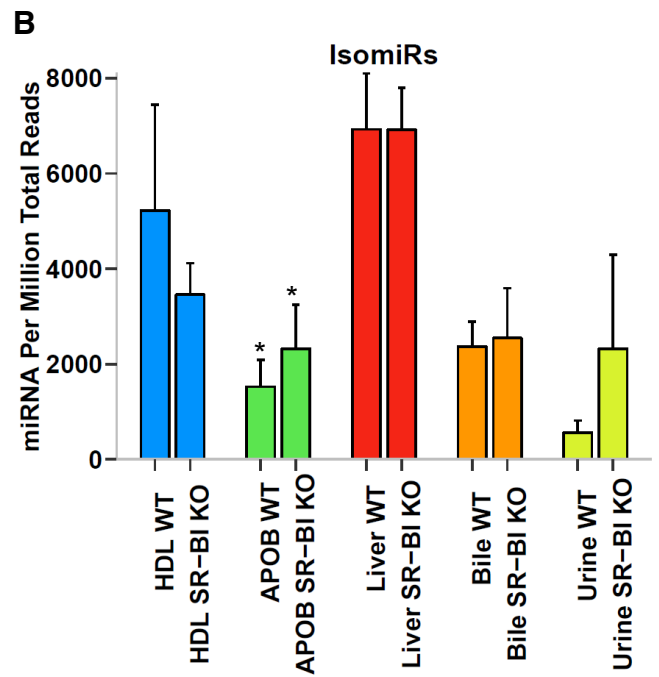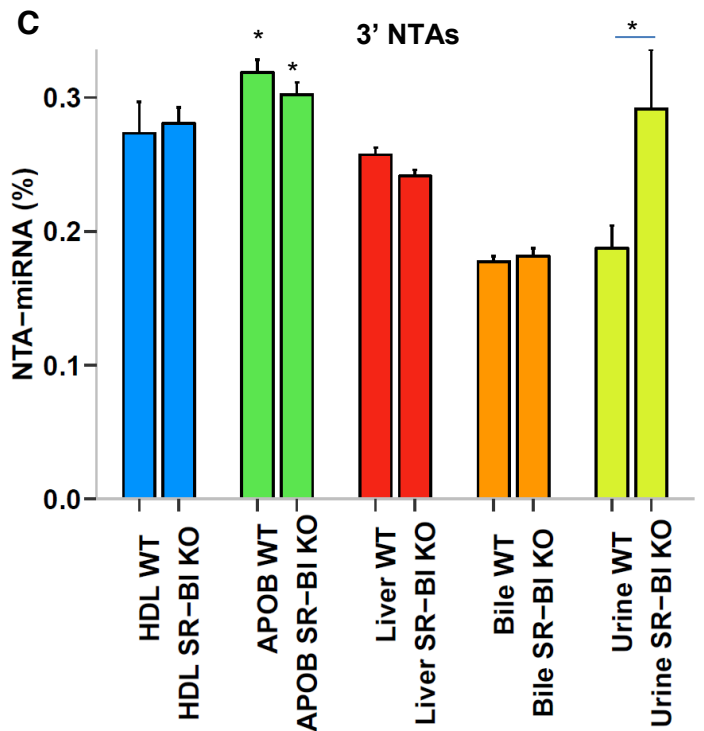

**Figure 2-Figure Supplement 1. Expression of miRNA 5' isomiRs and 3' NTAs across sample types.** WT, wild-type mice; SR-BI KO, Scavenger receptor BI Knockout mice (*Scarb1*<sup>-/-</sup>). (A) Pie charts illustrating the fraction of miRNA 5' isomiRs (red) per total miRNA reads. (B-C) sRNA-seq analysis of miRNA (B) 5' isomiRs and (C) 3' non-templated additions (NTA). Mean  $\pm$  S.E.M. Student's t-tests. \* $p < 0.05$ . Unless noted, groups are compared to liver. HDL WT, N=7; HDL SR-BI KO N=7; APOB WT, N=7; APOB SR-BI KO N=7; Liver WT, N=7; Liver SR-BI KO, N=7; Bile WT, N=7; Bile SR-BI KO, N=6; Urine WT, N=5; Urine SR-BI KO, N=6.

**Figure 2 - Source Data 1. HDL-miRNA levels (mean) by real-time PCR TaqMan assays, as reported by relative quantitative values (RQV).**

|          | miR-181a | miR-10b | miR-26a | miR-146a | miR-338-5p | miR-92a | miR-223 | miR-375 | miR-451 |
|----------|----------|---------|---------|----------|------------|---------|---------|---------|---------|
| WT       | 0.10     | 0.07    | 0.49    | 7.51     | 5.74       | 13.14   | 11.77   | 1.25    | 76.91   |
| SR-BI KO | 0.09     | 0.08    | 0.39    | 7.81     | 5.47       | 20.54   | 13.09   | 2.12    | 102.21  |

**Figure 2 - Source Data 2. Multivariate analysis of sRNA profiles compared to liver profiles (WT only).**

| Group | Class    | Level    | Dispersion_Fvalue | Dispersion_pvalue | Permanova_FValue | Permanova_pvalue |
|-------|----------|----------|-------------------|-------------------|------------------|------------------|
| APOB  | All_host | Parent   | 39.59             | 7.33E-12          | 9.82             | 1.00E-03         |
| HDL   | All_host | Parent   | 32.11             | 4.43E-10          | 8.71             | 1.00E-03         |
| Bile  | All_host | Parent   | 41.74             | 2.87E-12          | 12.53            | 1.00E-03         |
| Urine | All_host | Parent   | 30.31             | 6.01E-10          | 7.03             | 1.00E-03         |
| APOB  | lincRNA  | Parent   | 7.72              | 1.01E-03          | 9.24             | 1.00E-03         |
| HDL   | lincRNA  | Parent   | 7.95              | 8.33E-04          | 7.48             | 1.00E-03         |
| Bile  | lincRNA  | Parent   | 16.21             | 2.10E-06          | 9.23             | 1.00E-03         |
| Urine | lincRNA  | Parent   | 8.37              | 5.99E-04          | 9.50             | 1.00E-03         |
| APOB  | miRNA    | Parent   | 31.03             | 4.18E-10          | 9.57             | 1.00E-03         |
| HDL   | miRNA    | Parent   | 23.20             | 2.82E-08          | 7.11             | 1.00E-03         |
| Bile  | miRNA    | Parent   | 17.09             | 1.78E-06          | 5.56             | 1.00E-03         |
| Urine | miRNA    | Parent   | 15.47             | 3.42E-06          | 8.42             | 1.00E-03         |
| APOB  | miscRNA  | Parent   | 15.91             | 2.55E-06          | 7.05             | 1.00E-03         |
| HDL   | miscRNA  | Parent   | 7.85              | 9.07E-04          | 6.44             | 1.00E-03         |
| Bile  | miscRNA  | Parent   | 18.50             | 4.77E-07          | 9.17             | 1.00E-03         |
| Urine | miscRNA  | Parent   | 11.66             | 4.91E-05          | 7.47             | 1.00E-03         |
| APOB  | rRNA     | Parent   | 12.03             | 3.75E-05          | 17.19            | 1.00E-03         |
| HDL   | rRNA     | Parent   | 7.20              | 1.53E-03          | 15.67            | 1.00E-03         |
| Bile  | rRNA     | Parent   | 10.48             | 1.18E-04          | 15.39            | 1.00E-03         |
| Urine | rRNA     | Parent   | 5.40              | 6.85E-03          | 5.47             | 1.00E-03         |
| APOB  | snoRNA   | Parent   | 27.03             | 3.34E-09          | 7.70             | 1.00E-03         |
| HDL   | snoRNA   | Parent   | 28.49             | 1.54E-09          | 8.05             | 1.00E-03         |
| Bile  | snoRNA   | Parent   | 34.82             | 6.53E-11          | 9.36             | 1.00E-03         |
| Urine | snoRNA   | Parent   | 23.99             | 1.80E-08          | 6.96             | 1.00E-03         |
| APOB  | snRNA    | Parent   | 10.01             | 1.68E-04          | 2.85             | 2.70E-02         |
| HDL   | snRNA    | Parent   | 15.64             | 3.06E-06          | 8.91             | 1.00E-03         |
| Bile  | snRNA    | Parent   | 14.68             | 5.83E-06          | 3.58             | 1.00E-02         |
| Urine | snRNA    | Parent   | 10.15             | 1.51E-04          | 2.94             | 2.80E-02         |
| APOB  | tRNA     | Parent   | 42.41             | 2.15E-12          | 3.50             | 3.40E-02         |
| HDL   | tRNA     | Parent   | 34.77             | 6.68E-11          | 0.74             | 4.95E-01         |
| Bile  | tRNA     | Parent   | 29.00             | 1.18E-09          | 14.42            | 1.00E-03         |
| Urine | tRNA     | Parent   | 20.52             | 1.37E-07          | 9.50             | 1.00E-03         |
| APOB  | All_host | Fragment | 78.26             | <2.2e-16          | 7.81             | 1.00E-03         |
| HDL   | All_host | Fragment | 79.02             | <2.2e-16          | 7.29             | 1.00E-03         |
| Bile  | All_host | Fragment | 68.60             | <2.2e-16          | 8.88             | 1.00E-03         |
| Urine | All_host | Fragment | 50.33             | <2.2e-16          | 7.77             | 1.00E-03         |
| APOB  | miRNA    | Fragment | 35.96             | 3.82E-11          | 8.85             | 1.00E-03         |
| HDL   | miRNA    | Fragment | 29.30             | 1.01E-09          | 7.12             | 1.00E-03         |
| Bile  | miRNA    | Fragment | 22.15             | 5.19E-08          | 5.42             | 1.00E-03         |
| Urine | miRNA    | Fragment | 20.13             | 1.74E-07          | 7.65             | 1.00E-03         |
| APOB  | miscRNA  | Fragment | 146.61            | <2.2e-16          | 4.32             | 1.00E-03         |
| HDL   | miscRNA  | Fragment | 123.10            | <2.2e-16          | 5.89             | 1.00E-03         |
| Bile  | miscRNA  | Fragment | 79.49             | <2.2e-16          | 5.66             | 1.00E-03         |
| Urine | miscRNA  | Fragment | 137.23            | <2.2e-16          | 4.23             | 1.00E-03         |
| APOB  | rDR      | Fragment | 379.50            | <2.2e-16          | 6.27             | 1.00E-03         |
| HDL   | rDR      | Fragment | 335.62            | <2.2e-16          | 6.67             | 1.00E-03         |
| Bile  | rDR      | Fragment | 209.64            | <2.2e-16          | 8.07             | 1.00E-03         |
| Urine | rDR      | Fragment | 243.10            | <2.2e-16          | 7.26             | 1.00E-03         |
| APOB  | snoDR    | Fragment | 95.54             | <2.2e-16          | 5.76             | 1.00E-03         |
| HDL   | snoDR    | Fragment | 97.85             | <2.2e-16          | 6.45             | 1.00E-03         |
| Bile  | snoDR    | Fragment | 71.98             | <2.2e-16          | 7.26             | 1.00E-03         |
| Urine | snoDR    | Fragment | 82.83             | <2.2e-16          | 5.64             | 1.00E-03         |
| APOB  | snDR     | Fragment | 56.19             | 9.85E-15          | 4.73             | 1.00E-03         |
| HDL   | snDR     | Fragment | 68.87             | <2.2e-16          | 5.72             | 1.00E-03         |
| Bile  | snDR     | Fragment | 37.79             | 1.64E-11          | 4.89             | 1.00E-03         |
| Urine | snDR     | Fragment | 50.18             | 9.25E-14          | 3.44             | 1.00E-03         |
| APOB  | tDR      | Fragment | 41.70             | 2.92E-12          | 5.32             | 1.00E-03         |
| HDL   | tDR      | Fragment | 33.55             | 1.20E-10          | 2.94             | 1.40E-02         |
| Bile  | tDR      | Fragment | 22.95             | 3.15E-08          | 10.22            | 1.00E-03         |
| Urine | tDR      | Fragment | 16.27             | 2.01E-06          | 7.08             | 1.00E-03         |

# tDRs

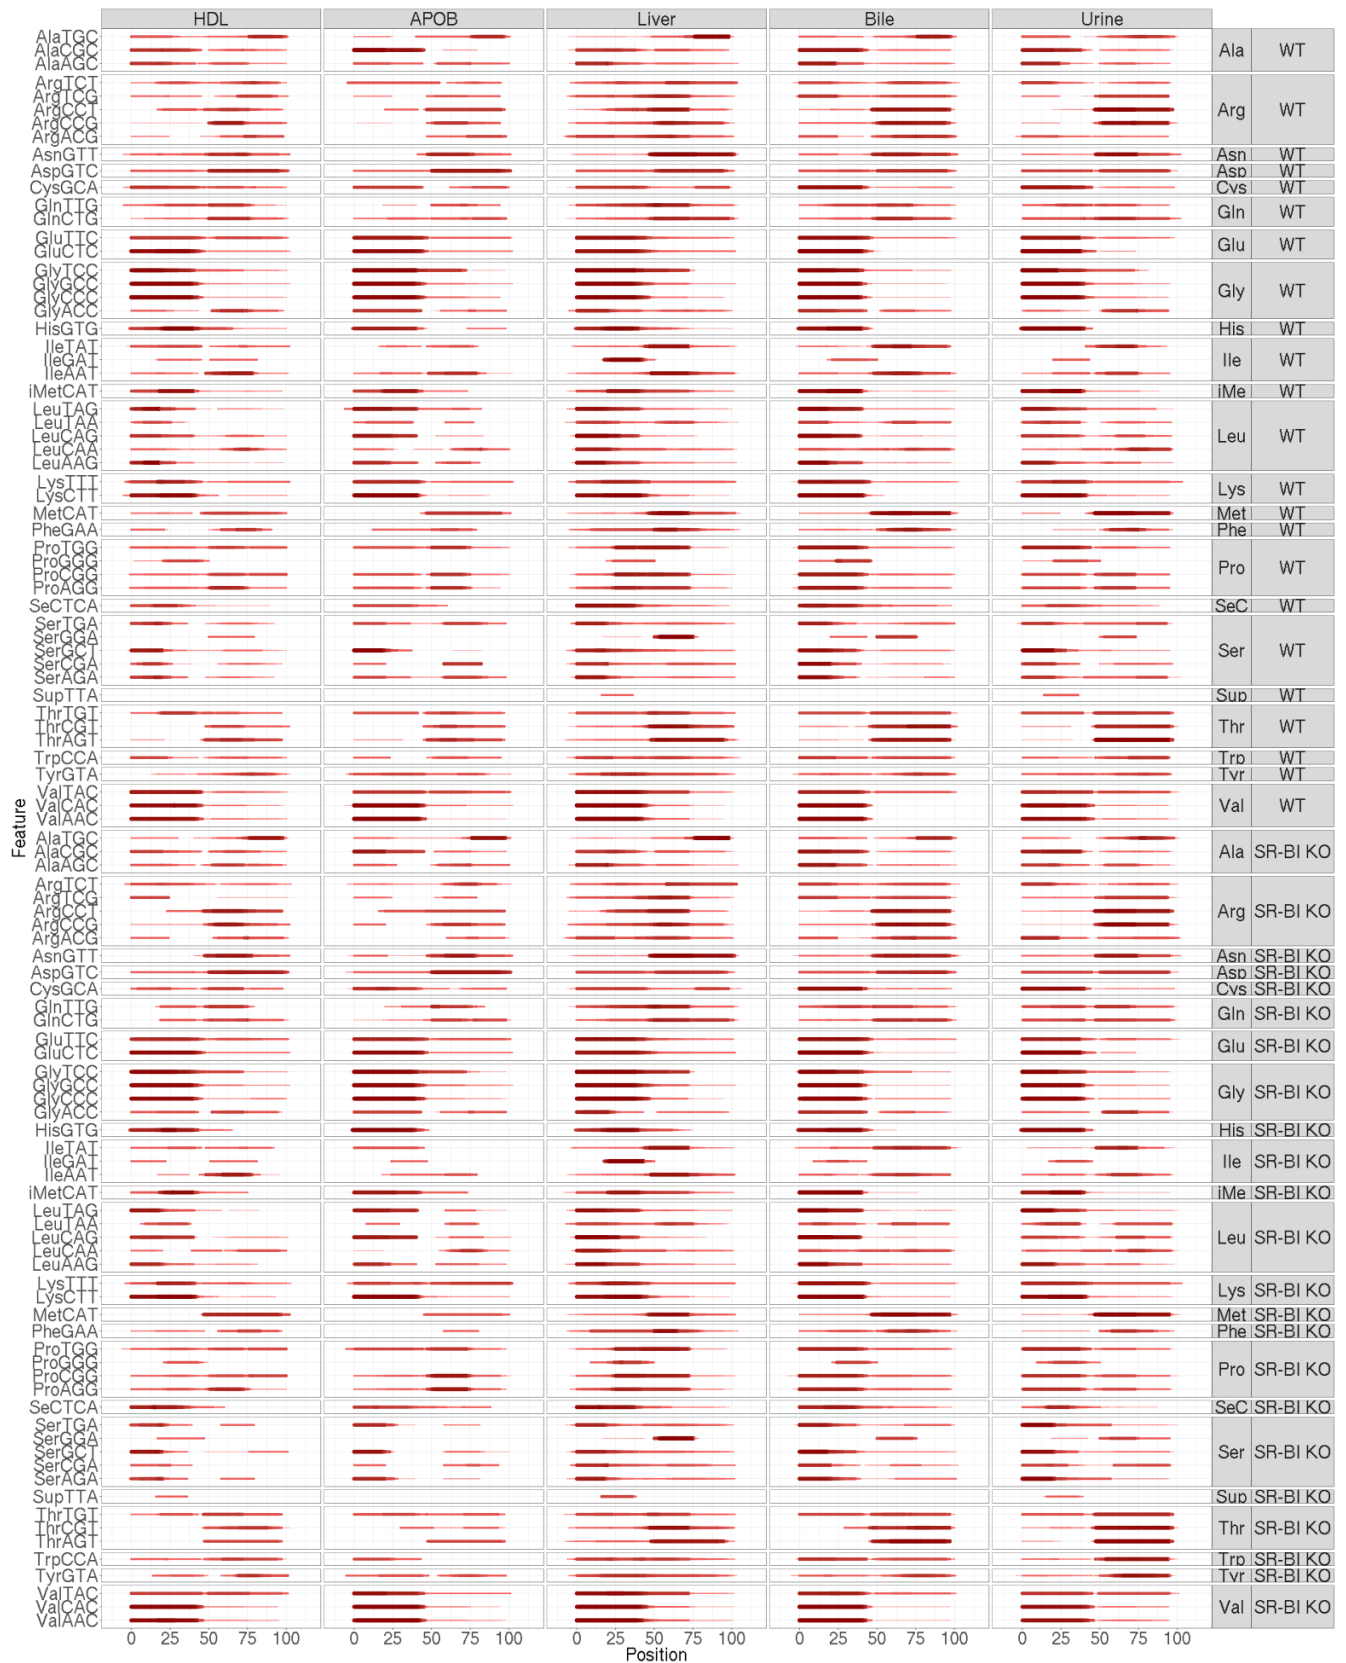

**Figure 4-Figure Supplement 1. Positional coverage analysis of host tDRs based on parent tRNA amino acid anticodons.** Signal (red) represents mean coverage percentage across parent length. WT, wild-type mice; SR-BI KO, Scavenger receptor BI Knockout mice (*Scarb1*<sup>-/-</sup>). HDL WT, N=7; HDL SR-BI KO N=7; APOB WT, N=7, APOB SR-BI KO N=7; Liver WT, N=7; Liver SR-BI KO, N=7; Bile WT, N=7; Bile SR-BI KO, N=6; Urine WT, N=5; Urine SR-BI KO, N=6.

**A**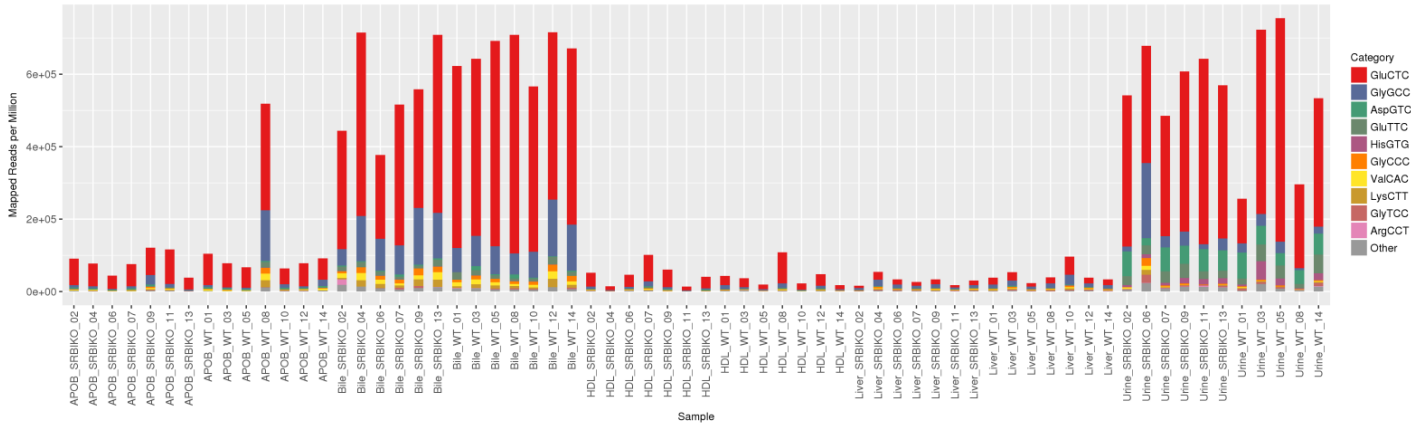**B**

Category ■ GluCTC ■ AspGTC ■ GlyCCC ■ Other  
■ GlyGCC ■ GluTTC ■ ValCAC

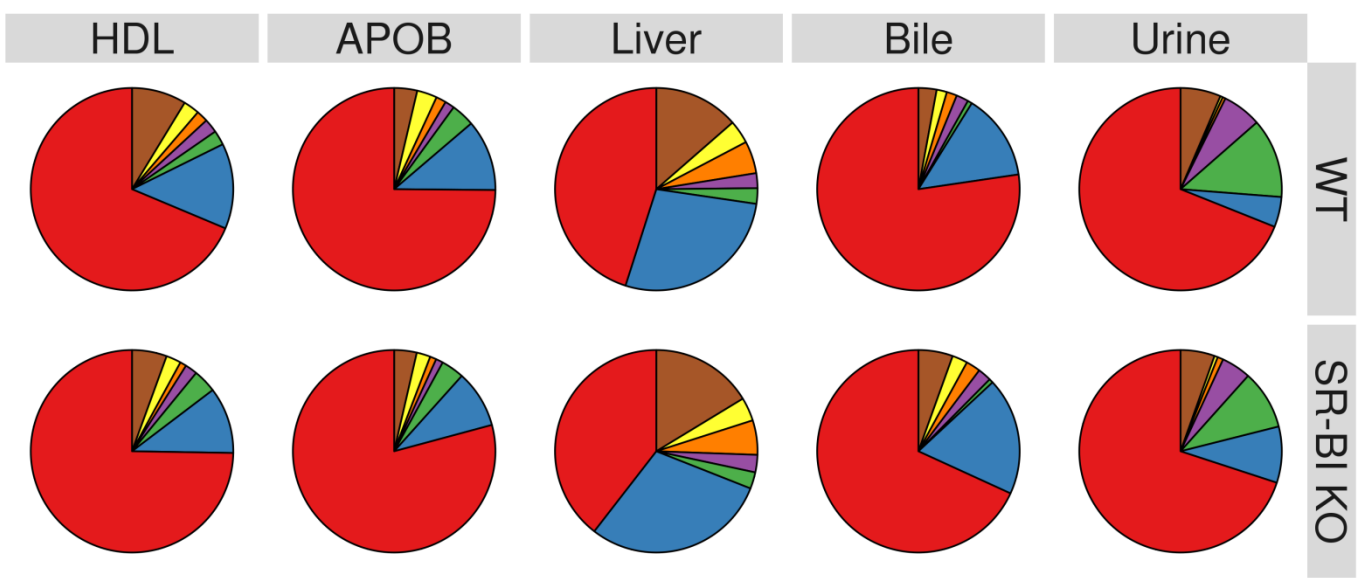

**Figure 4-Figure Supplement 2. Classification of host tDRs based on parent tRNA amino acid anticodons.** WT, wild-type mice; SR-BI KO, Scavenger receptor BI Knockout mice (*Scarb1<sup>-/-</sup>*). **(A)** Normalized read counts for host tDRs (per million total reads) based parent tRNA amino acid anticodons. **(B)** Pie charts illustrating the percent of host tDRs per total tDR counts for parent tRNA amino acid anticodons. HDL WT, N=7; HDL SR-BI KO N=7; APOB WT, N=7, APOB SR-BI KO N=7; Liver WT, N=7; Liver SR-BI KO, N=7; Bile WT, N=7; Bile SR-BI KO, N=6; Urine WT, N=5; Urine SR-BI KO, N=6.

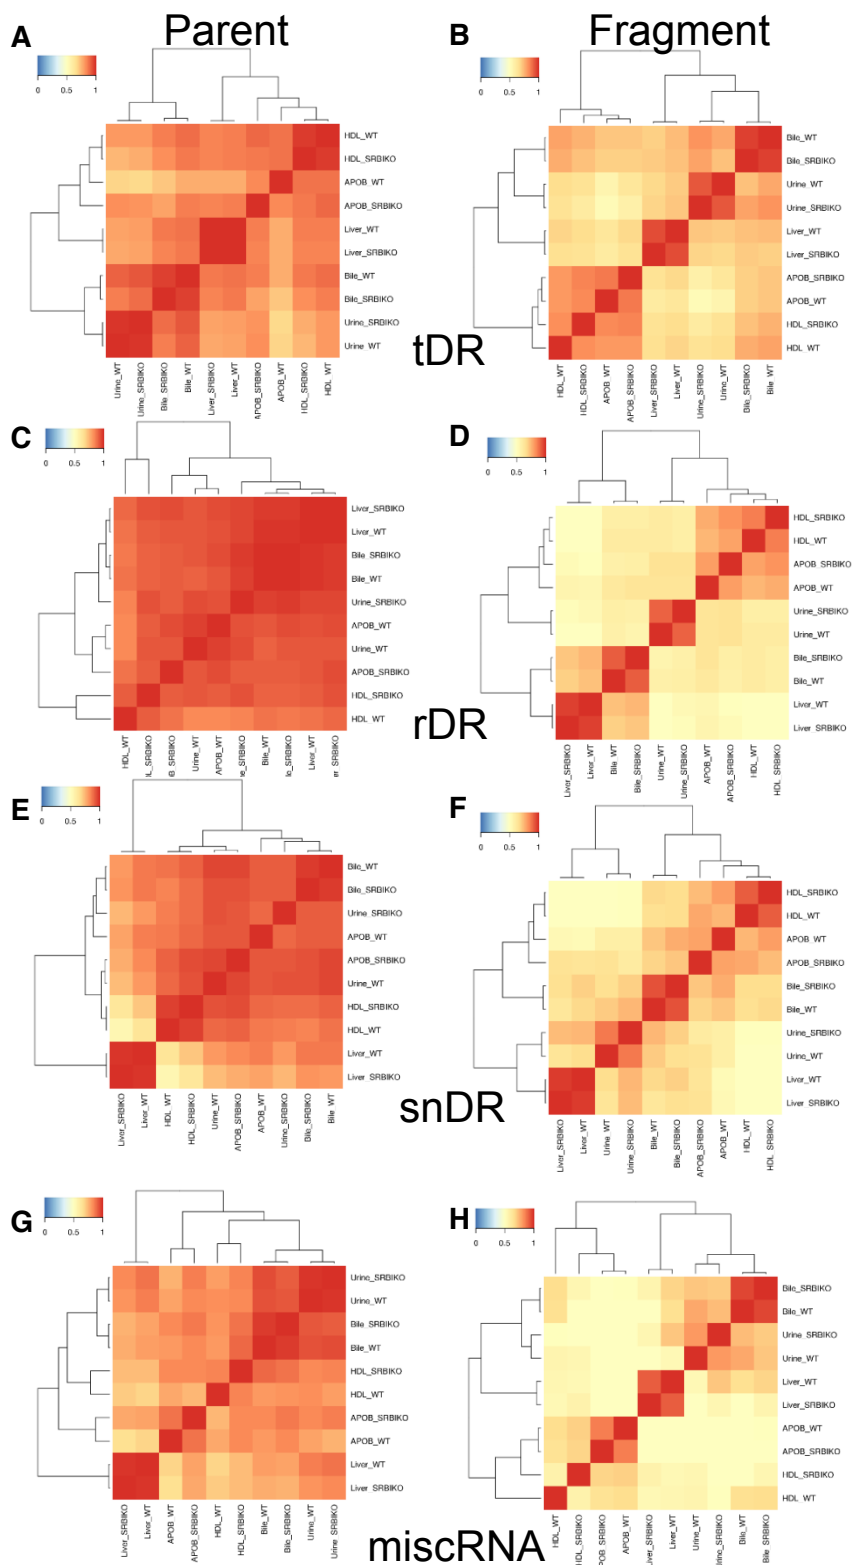

**Figure 4-Figure Supplement 3. Groups are defined by the profile of individual fragments, not parent RNAs. (A-H) Heatmap of hierarchical clustered pairwise correlation (Spearman, R) coefficients between group means for host sRNAs. (A) Parent tDR (B) Fragment tDR (C) Parent rDR (D) Fragment rDR (E) Parent snDR (F) Fragment snDR (G) Parent miscRNA (H) Fragment miscRNA. WT, wild-type mice; SR-BI KO, Scavenger receptor BI Knockout mice (*Scarb1*<sup>-/-</sup>). HDL WT, N=7; HDL SR-BI KO N=7; APOB WT, N=7, APOB SR-BI KO N=7; Liver WT, N=7; Liver SR-BI KO, N=7; Bile WT, N=7; Bile SR-BI KO, N=6; Urine WT, N=5; Urine SR-BI KO, N=6.**

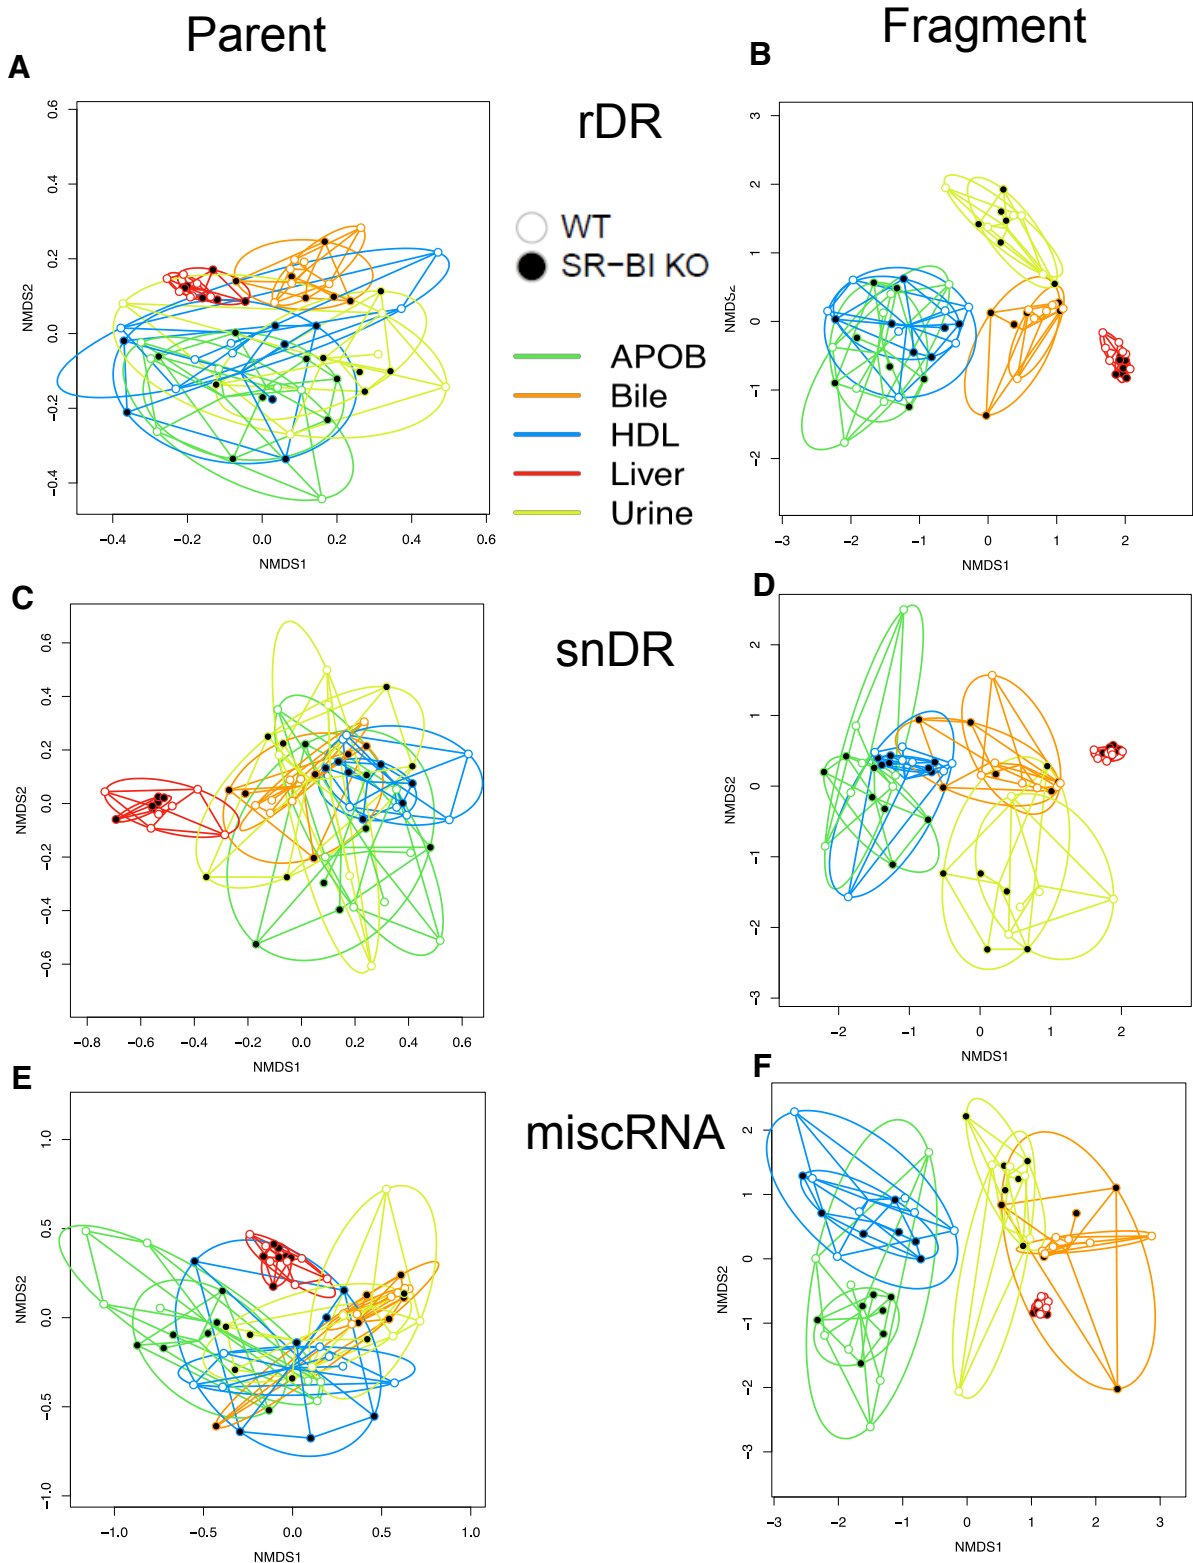

**Figure 4-Figure Supplement 4. Lipoprotein host sRNA profiles are distinct from liver and biofluids.** (A-F) Principal Coordinate Analysis (PCoA) of host sRNA profiles based on (A) parent rRNAs, (B) individual fragment rDRs, (C) parent snRNAs, (D) individual fragment snDRs, (E) parent miscellaneous RNAs (miscRNA), and (F) individual fragment miscRNAs for samples from WT (empty circles) and SR-BI KO (filled circles) mice. NMDS1, Non-metric multidimensional scaling. WT, wild-type mice; SR-BI KO, Scavenger receptor BI Knockout mice (*Scarb1*<sup>-/-</sup>). HDL WT, N=7; HDL SR-BI KO N=7; APOB WT, N=7, APOB SR-BI KO N=7; Liver WT, N=7; Liver SR-BI KO, N=7; Bile WT, N=7; Bile SR-BI KO, N=6; Urine WT, N=5; Urine SR-BI KO, N=6.



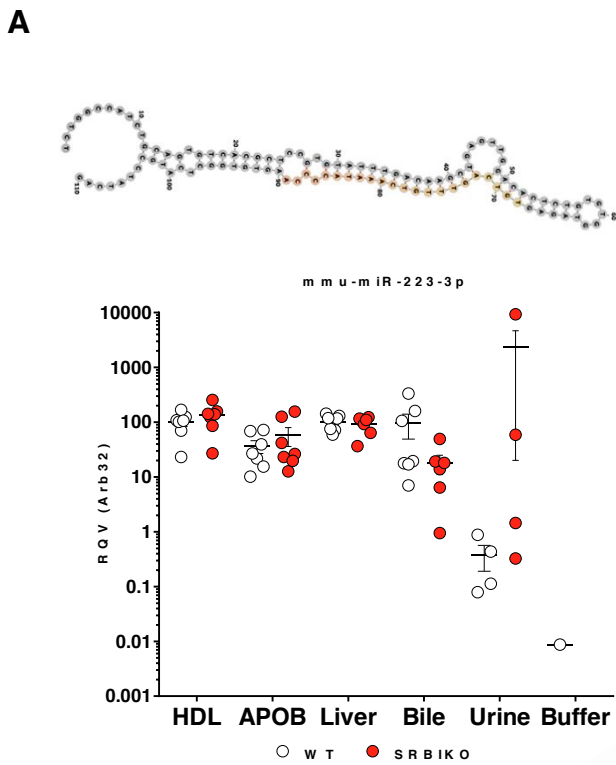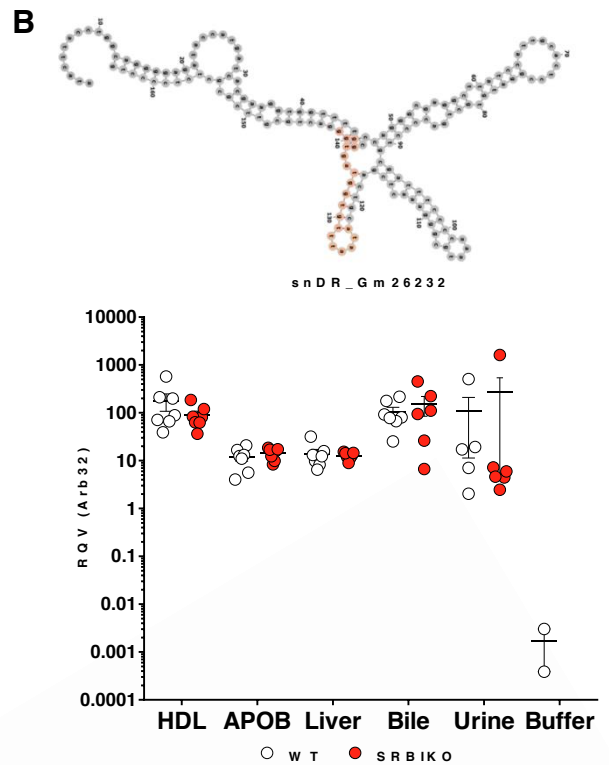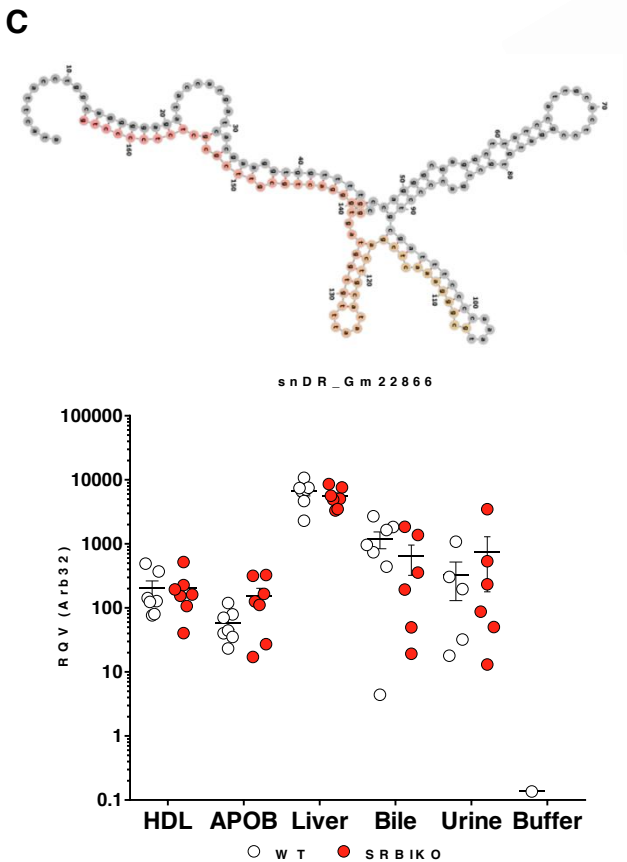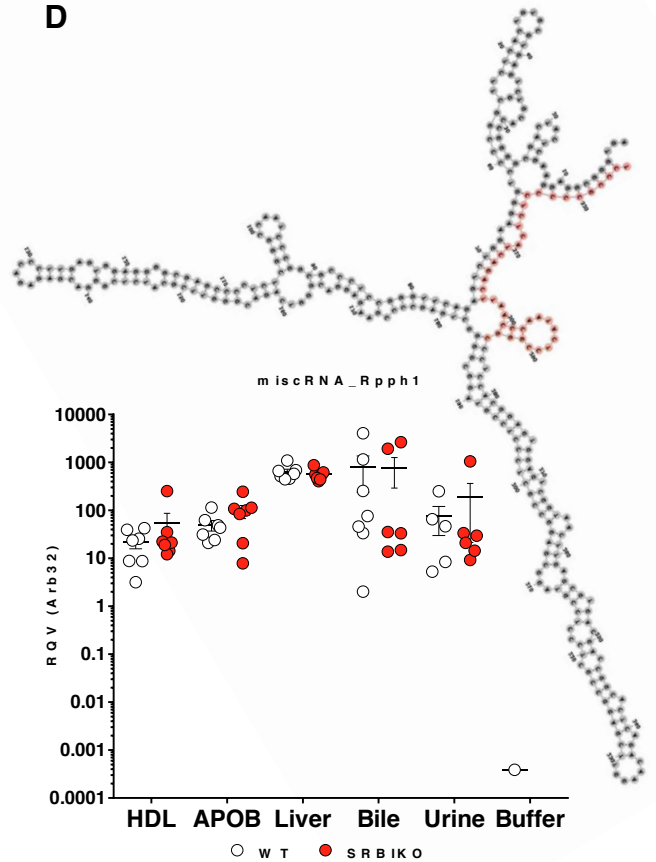

**Figure 4-Figure Supplement 5. Lipoproteins transport multiple classes of host sRNAs (A-D)** Real-time PCR analysis of candidate sRNAs with predicted folding structures of parent RNAs for (A) mmu-miR-223-3p, (B) snDR\_Gm26232, (C) snDR\_Gm22866, and (D) miscellaneous RNA (miscRNA) Rpph1. WT (white circles), wild-type mice; SR-BI KO (red circles), Scavenger receptor BI Knockout mice (*Scarb1*<sup>-/-</sup>). HDL WT, N=7; HDL SR-BI KO N=7; APOB WT, N=7; APOB SR-BI KO N=7; Liver WT, N=7; Liver SR-BI KO, N=7; Bile WT, N=7; Bile SR-BI KO, N=6; Urine WT, N=5; Urine SR-BI KO, N=6.

# snDRs

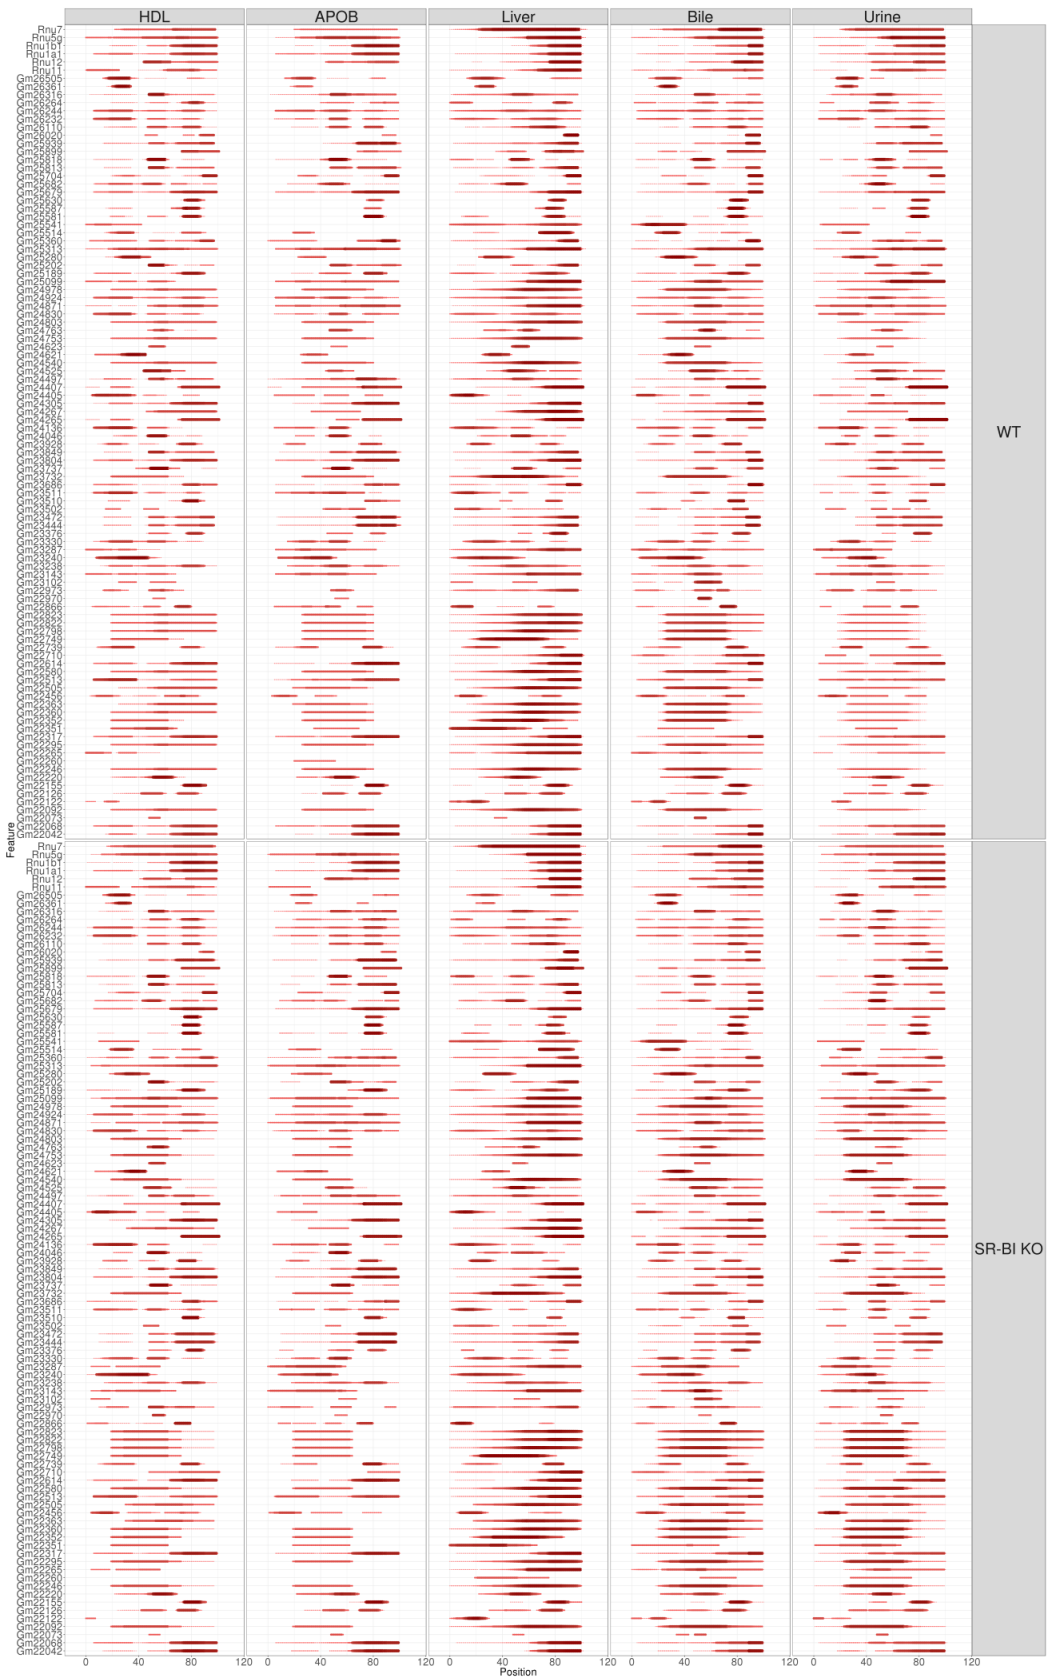

**Figure 4-Figure Supplement 6. Positional coverage analysis of host snDRs based on parent snRNAs.** Signal (red) represents mean coverage percentage across parent length. WT, wild-type mice; SR-BI KO, Scavenger receptor BI Knockout mice (*Scarb1<sup>-/-</sup>*). HDL WT, N=7; HDL SR-BI KO N=7; APOB WT, N=7, APOB SR-BI KO N=7; Liver WT, N=7; Liver SR-BI KO, N=7; Bile WT, N=7; Bile SR-BI KO, N=6; Urine WT, N=5; Urine SR-BI KO, N=6.

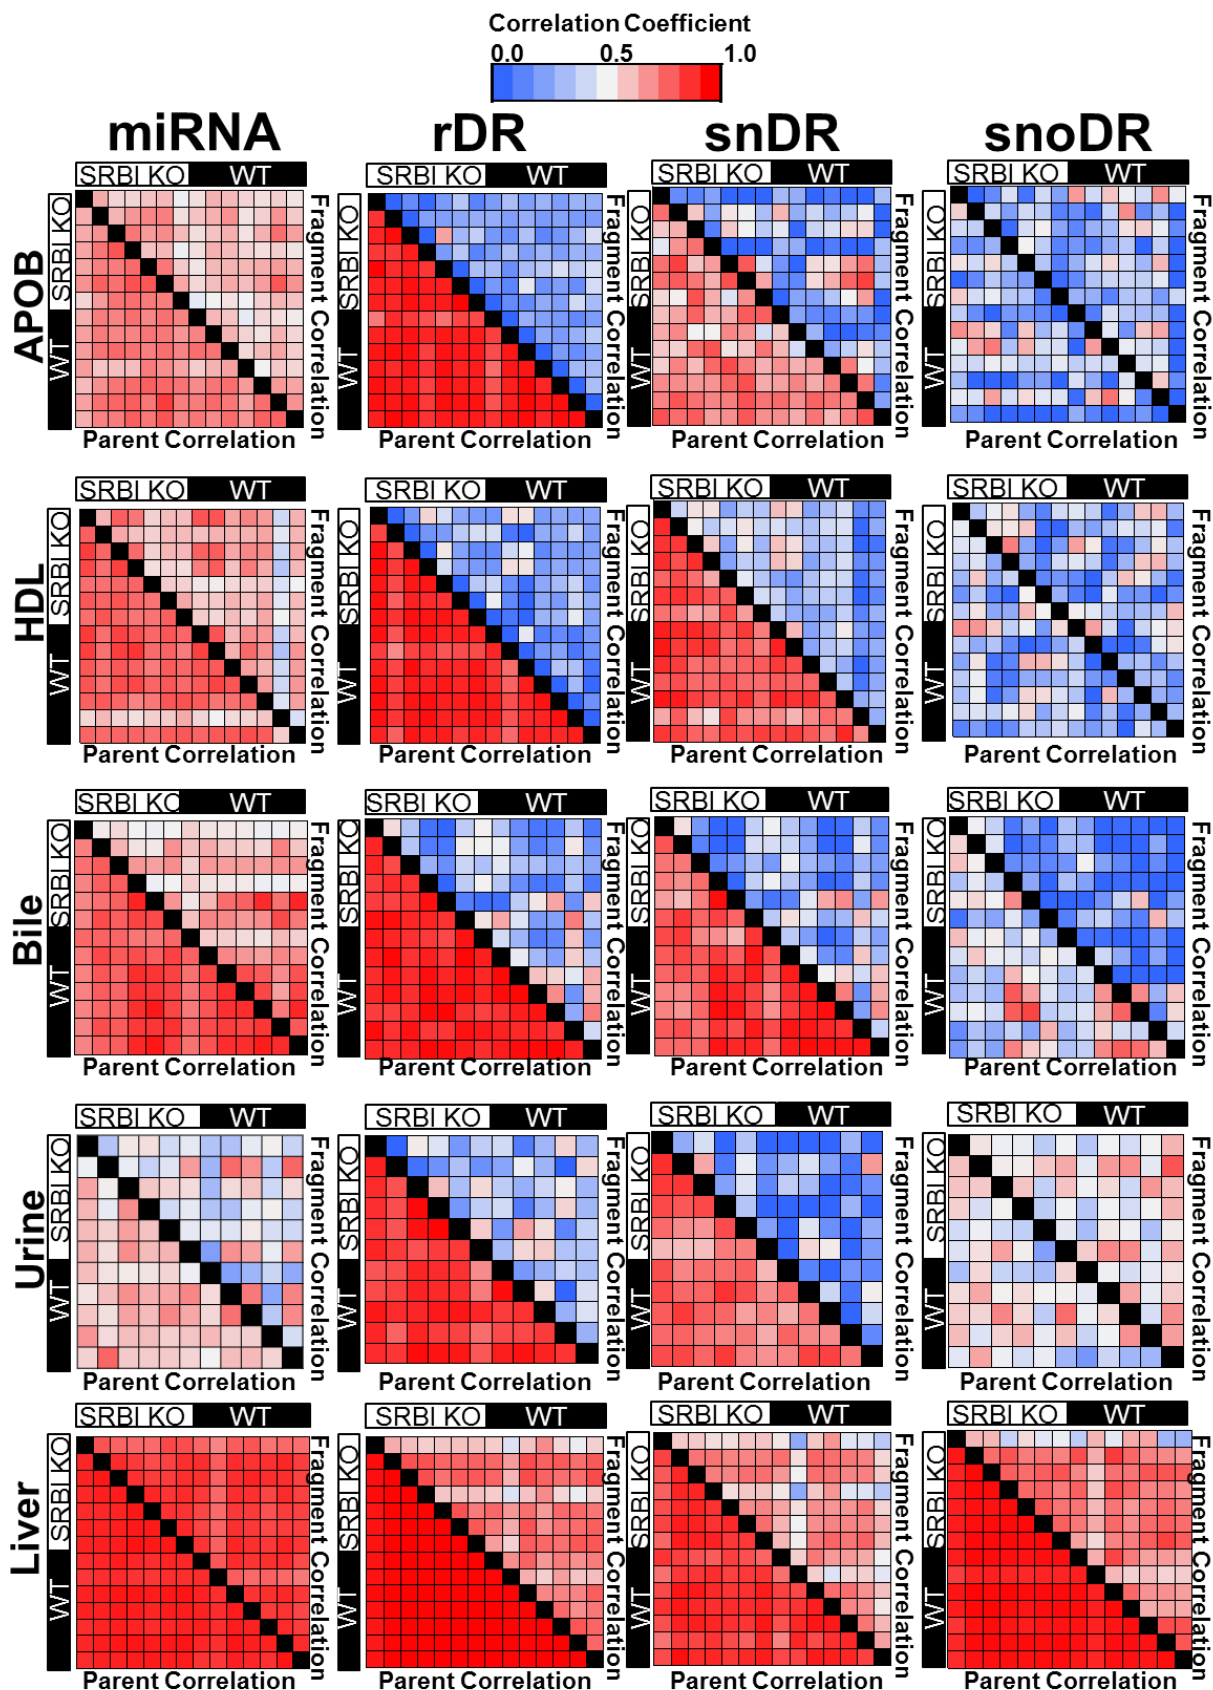

**Figure 4-Figure Supplement 7. Lipoprotein sRNA profiles are highly-correlated for parent RNAs and lowly-correlated for individual sRNAs fragments.** Heatmaps of correlation coefficients (Spearman, R) for host sRNA parents and individual fragments across samples within each group for miRNAs, rDRs, snDRs, and snoDRs. WT, wild-type mice; SR-BI KO, Scavenger receptor BI Knockout mice (*Scarb1*<sup>-/-</sup>). HDL WT, N=7; HDL SR-BI KO N=7; APOB WT, N=7, APOB SR-BI KO N=7; Liver WT, N=7; Liver SR-BI KO, N=7; Bile WT, N=7; Bile SR-BI KO, N=6; Urine WT, N=5; Urine SR-BI KO, N=6.

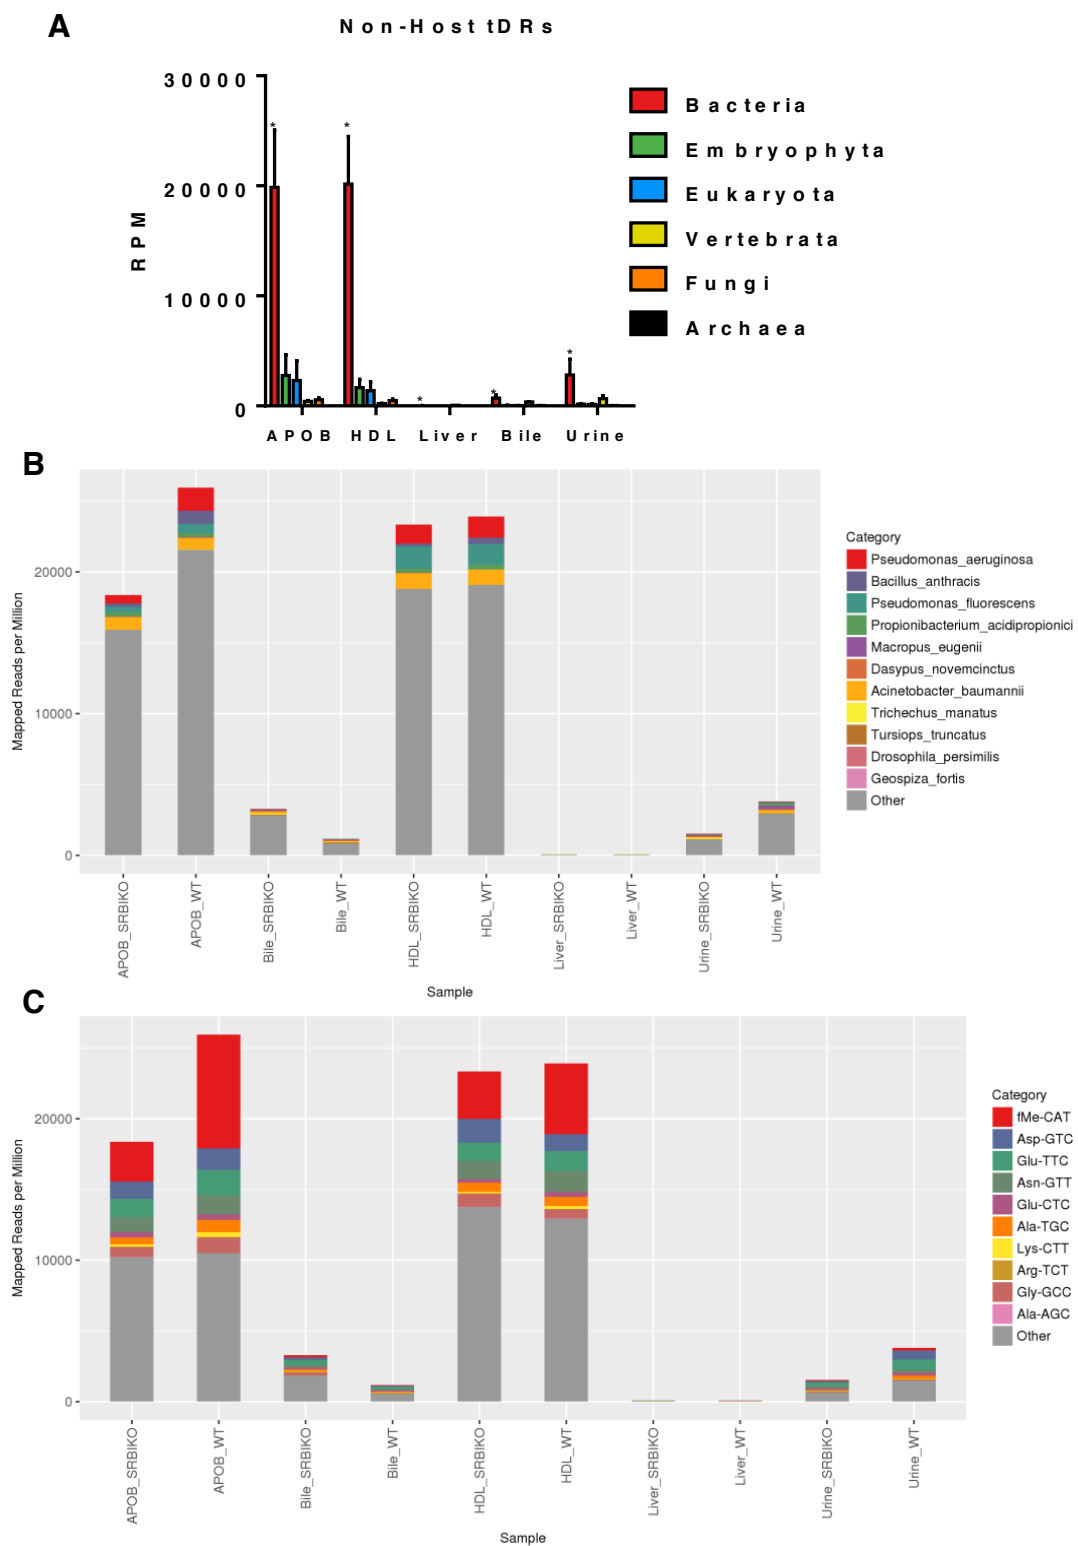

**Figure 5-Figure Supplement 1. Lipoproteins transport non-host bacterial tDRs.** (A) Abundance of non-host tDRs based on parent tRNA transcripts (database) across kingdoms and higher organizations, as reported as Reads Per Million total reads (RPM). Two-way ANOVA Tukey's multiple comparisons test. \* $p < 0.05$ . (B-C) Stacked bar plots of non-host tDRs aligned to parent rRNAs across kingdoms and higher organizations, as reported as mapped reads per million total reads for (B) bacterial species and (C) parent tRNA amino acid anti-codons. WT, wild-type mice; SR-BI KO, Scavenger receptor BI Knockout mice (*Scarb1*<sup>-/-</sup>). HDL WT, N=7; HDL SR-BI KO N=7; APOB WT, N=7, APOB SR-BI KO N=7; Liver WT, N=7; Liver SR-BI KO, N=7; Bile WT, N=7; Bile SR-BI KO, N=6; Urine WT, N=5; Urine SR-BI KO, N=6.

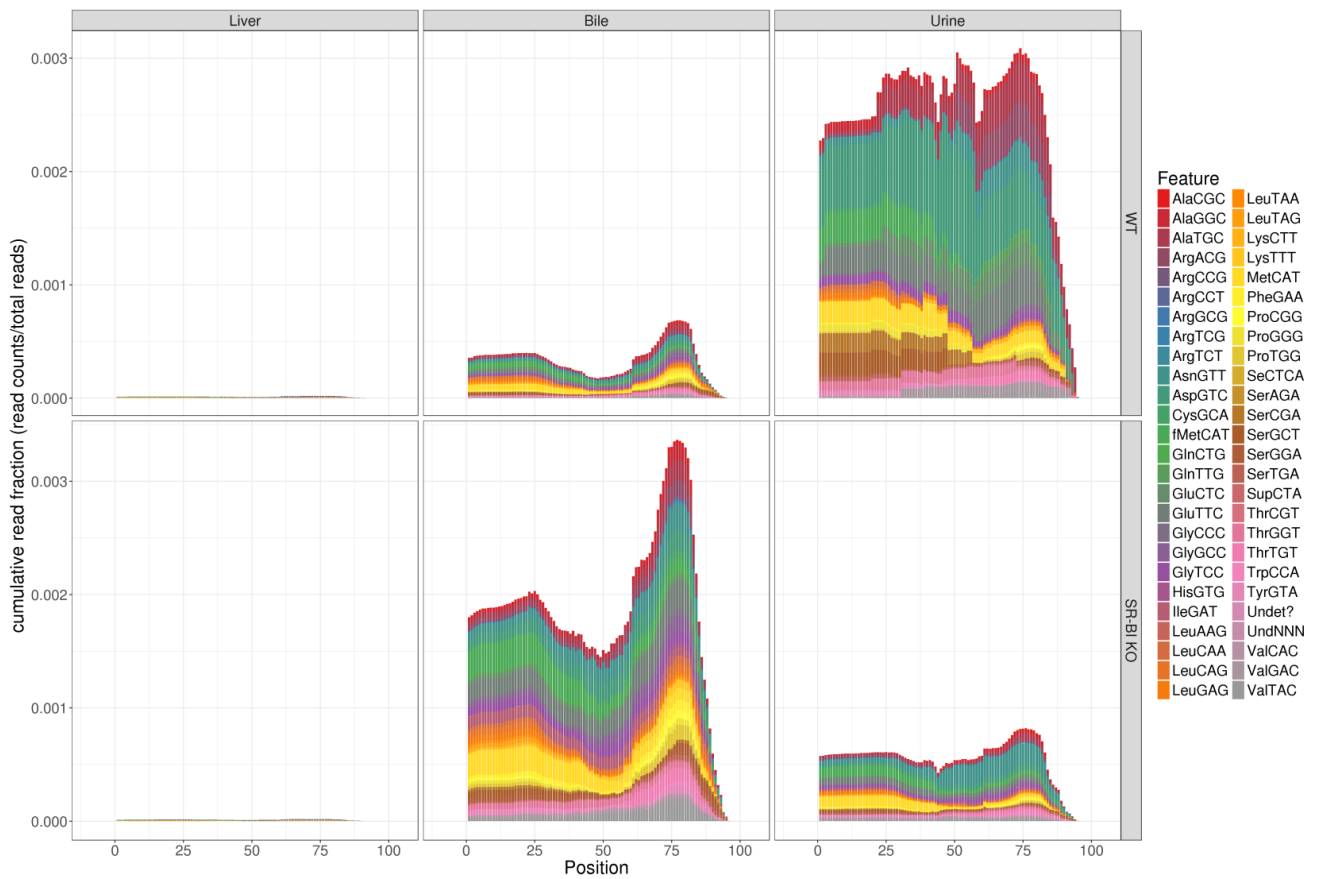

**Figure 5-Figure Supplement 2. Bile and urine contain non-host tDRs.** Positional coverage maps of non-host tDRs for parent tRNA amino acid anti-codons, as reported as mean cumulative read fractions (read counts / total counts) for liver, bile, and urine. WT, wild-type mice; SR-BI KO, Scavenger receptor BI Knockout mice (*Scarb1<sup>-/-</sup>*). HDL WT, N=7; HDL SR-BI KO N=7; APOB WT, N=7, APOB SR-BI KO N=7; Liver WT, N=7; Liver SR-BI KO, N=7; Bile WT, N=7; Bile SR-BI KO, N=6; Urine WT, N=5; Urine SR-BI KO, N=6.

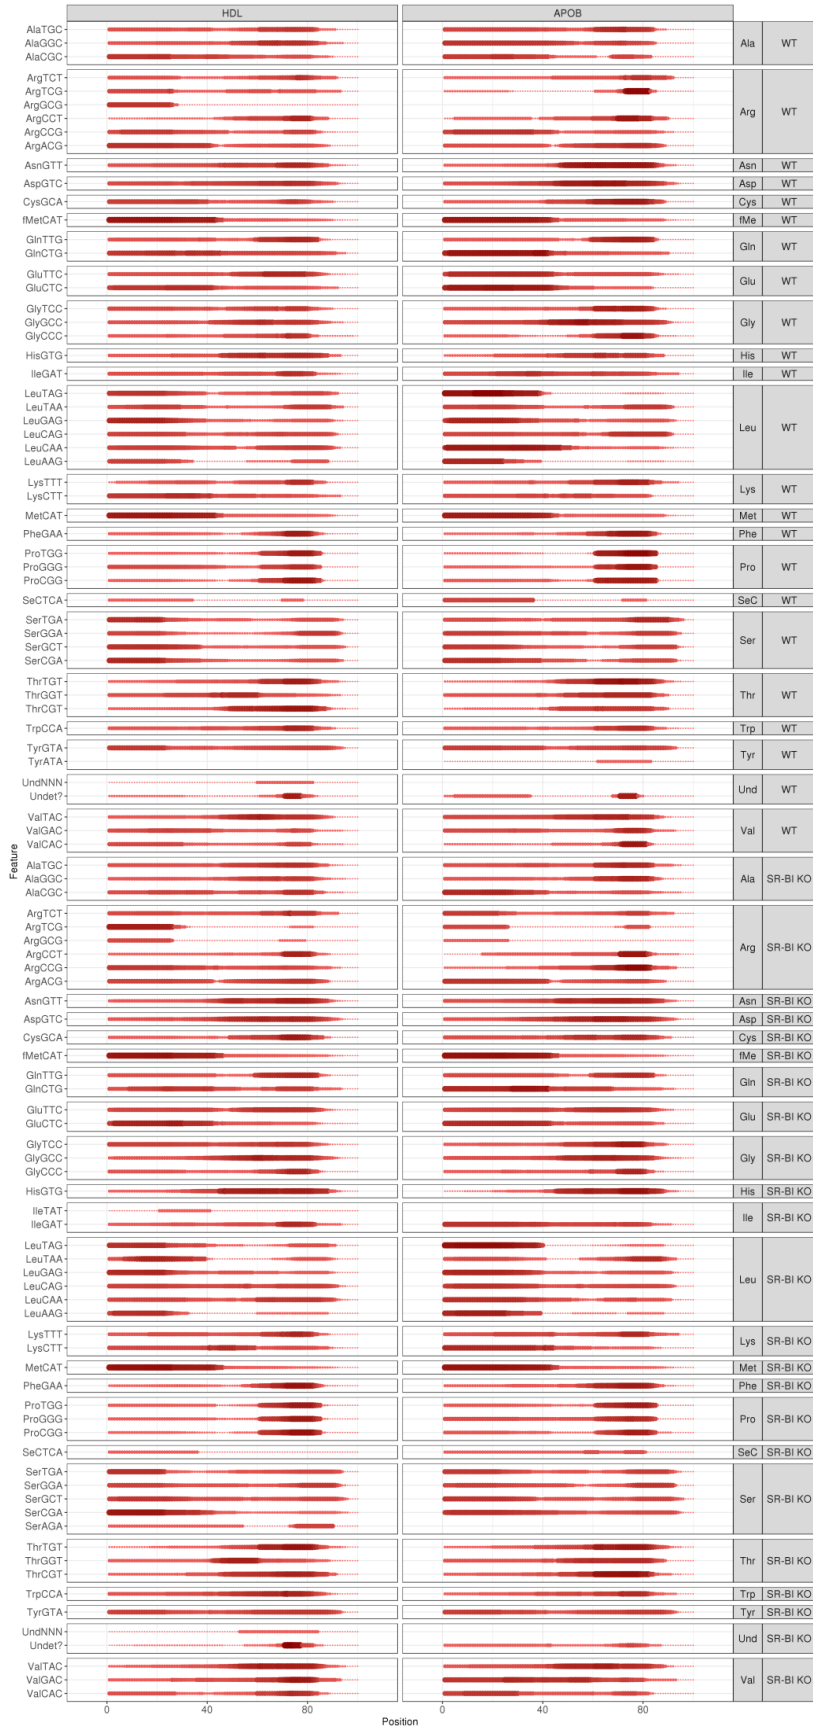

**Figure 5-Figure Supplement 3. Positional coverage analysis of non-host tDRs based on parent tRNA amino acid anticodons.** Signal (red) represents mean coverage percentage across parent length. WT, wild-type mice; SR-BI KO, Scavenger receptor BI Knockout mice (*Scarb1*<sup>-/-</sup>). HDL WT, N=7; HDL SR-BI KO N=7; APOB WT, N=7, APOB SR-BI KO N=7; Liver WT, N=7; Liver SR-BI KO, N=7; Bile WT, N=7; Bile SR-BI KO, N=6; Urine WT, N=5; Urine SR-BI KO, N=6.

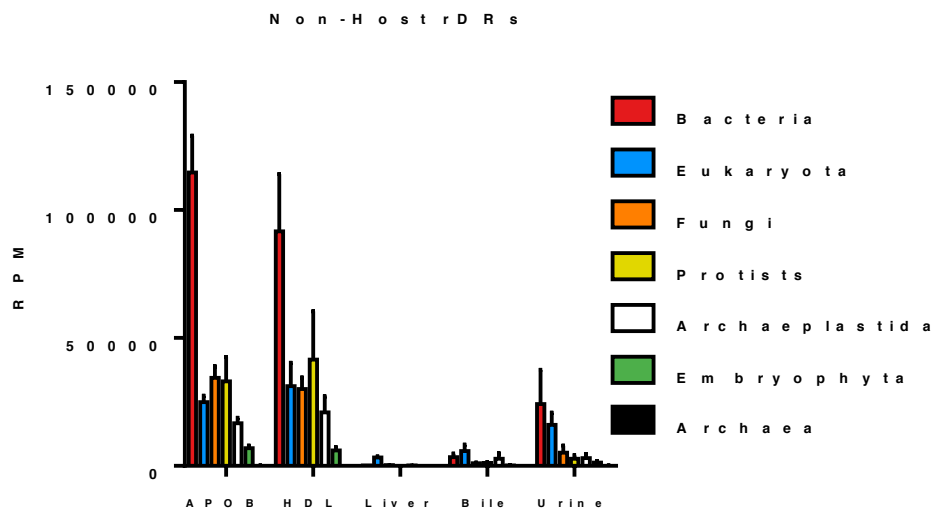

**Figure 5-Figure Supplement 4. Lipoproteins transport non-host rDRs.** (A) Abundance of non-host rDRs based on parent rRNA transcripts (database) across kingdoms and higher organizations, as reported as Reads Per Million total reads (RPM).

**Figure 5-Source Data 1. Non-host miRNAs (Mean RPM)**

| Name              | APOB_SRBKO | APOB_WT | Bile_SRBKO | Bile_WT | HDL_SRBKO | HDL_WT | Liver_SRBKO | Liver_WT | Urine_SRBKO | Urine_WT |
|-------------------|------------|---------|------------|---------|-----------|--------|-------------|----------|-------------|----------|
| bta-miR-574       | 35.22      | 16.46   | 42.78      | 58.56   | 52.88     | 65.38  | 5.24        | 5.70     | 6.97        | 16.50    |
| ahy-miR159        | 10.56      | UND     | 82.14      | 0.52    | 1.91      | 13.23  | UND         | 0.12     | 4.22        | UND      |
| api-miR-71        | UND        | 4.69    | 4.12       | UND     | UND       | 11.02  | UND         | UND      | UND         | UND      |
| aly-miR164a-5p    | UND        | UND     | UND        | UND     | UND       | 9.93   | UND         | UND      | UND         | UND      |
| aly-miR166a-3p    | 12.35      | UND     | 0.06       | 1.08    | 15.29     | 8.90   | UND         | UND      | 0.36        | UND      |
| tae-miR9662a-3p   | UND        | UND     | UND        | UND     | UND       | 8.59   | UND         | 0.12     | UND         | 1.73     |
| chi-miR-1307-3p   | UND        | UND     | UND        | UND     | UND       | 4.37   | UND         | UND      | UND         | UND      |
| bdi-miR159b-3p.1  | 0.79       | UND     | 0.15       | 0.37    | UND       | 4.07   | UND         | UND      | UND         | UND      |
| aae-miR-14        | UND        | 11.16   | 1.54       | UND     | 8.59      | 3.22   | UND         | 0.12     | 1.87        | 4.12     |
| ata-miR528-5p     | UND        | UND     | UND        | UND     | UND       | 2.60   | UND         | UND      | UND         | UND      |
| cme-miR156j       | 12.80      | 0.68    | 6.40       | 0.92    | 2.32      | 2.51   | UND         | UND      | UND         | UND      |
| hsa-miR-1284      | UND        | UND     | UND        | UND     | UND       | 2.48   | UND         | UND      | UND         | UND      |
| pde-miR947        | UND        | UND     | UND        | UND     | UND       | 2.25   | UND         | UND      | UND         | UND      |
| aga-miR-276-3p    | UND        | 24.52   | 15.76      | UND     | UND       | 2.19   | UND         | UND      | UND         | UND      |
| hsa-miR-1304-3p   | UND        | UND     | UND        | UND     | UND       | 1.09   | UND         | UND      | UND         | UND      |
| ssa-miR-125b-5p   | 0.30       | 0.15    | 0.33       | 0.42    | 0.26      | 0.40   | 0.20        | 0.27     | 0.10        | 0.11     |
| ggo-miR-584       | UND        | UND     | UND        | UND     | UND       | 0.17   | UND         | 0.15     | UND         | UND      |
| efu-miR-660       | UND        | UND     | UND        | UND     | 0.10      | 0.11   | UND         | UND      | UND         | UND      |
| cfa-miR-329b      | UND        | UND     | UND        | UND     | UND       | 0.11   | UND         | UND      | UND         | UND      |
| age-miR-197       | 11.61      | UND     | UND        | 0.47    | 2.91      | 0.11   | UND         | UND      | UND         | UND      |
| ahy-miR156c       | 17.06      | 2.22    | UND        | 1.92    | 4.68      | 0.06   | UND         | UND      | UND         | 0.16     |
| lgi-miR-71        | UND        | UND     | UND        | UND     | UND       | 0.06   | UND         | UND      | UND         | UND      |
| asu-miR-71-5p     | 10.20      | 3.13    | 25.89      | UND     | 0.06      | UND    | UND         | 0.09     | 0.02        | UND      |
| hsa-miR-1908-5p   | 8.48       | 10.15   | 0.13       | UND     | 7.03      | UND    | UND         | UND      | UND         | UND      |
| ppc-miR-228-5p    | 8.05       | UND     | 15.29      | UND     | UND       | UND    | UND         | UND      | 0.01        | UND      |
| hsa-miR-92a-1-5p  | UND        | UND     | UND        | 0.34    | 11.52     | UND    | UND         | UND      | UND         | UND      |
| str-miR-8366a-3p  | UND        | UND     | 15.30      | UND     | UND       | UND    | UND         | UND      | UND         | UND      |
| asu-miR-50-5p     | UND        | 9.84    | 2.20       | UND     | UND       | UND    | UND         | UND      | UND         | UND      |
| cbn-miR-46        | UND        | UND     | 12.88      | UND     | UND       | UND    | UND         | UND      | UND         | UND      |
| bta-miR-424-3p    | 9.20       | UND     | UND        | UND     | UND       | UND    | UND         | UND      | UND         | UND      |
| pab-miR951        | UND        | UND     | UND        | 6.55    | UND       | UND    | UND         | UND      | UND         | UND      |
| hsa-miR-3614-5p   | UND        | UND     | UND        | UND     | 4.78      | UND    | UND         | UND      | UND         | UND      |
| hsa-miR-489-3p    | UND        | UND     | UND        | UND     | UND       | UND    | UND         | UND      | 0.30        | 2.80     |
| mdm-miR482a-5p    | UND        | UND     | UND        | UND     | 4.06      | UND    | UND         | UND      | UND         | UND      |
| aau-miR396        | UND        | UND     | UND        | UND     | 1.82      | UND    | UND         | UND      | UND         | UND      |
| oha-miR-122-5p    | UND        | UND     | UND        | UND     | UND       | UND    | 0.38        | 0.46     | UND         | UND      |
| aae-miR-278-3p    | UND        | UND     | 3.41       | UND     | UND       | UND    | UND         | UND      | UND         | UND      |
| aly-miR166a-5p    | UND        | UND     | UND        | UND     | 3.18      | UND    | UND         | UND      | UND         | UND      |
| aga-miR-277       | UND        | UND     | 3.21       | UND     | UND       | UND    | UND         | UND      | UND         | UND      |
| cte-miR-750       | UND        | UND     | 3.07       | UND     | UND       | UND    | UND         | UND      | UND         | UND      |
| hsa-miR-937-3p    | UND        | UND     | 4.50       | UND     | UND       | UND    | UND         | UND      | UND         | UND      |
| ggo-miR-589       | 3.78       | UND     | UND        | UND     | UND       | UND    | UND         | UND      | UND         | UND      |
| aly-miR168a-5p    | UND        | UND     | UND        | 0.74    | UND       | UND    | 0.15        | UND      | UND         | UND      |
| gma-miR482b-3p    | 3.04       | UND     | UND        | UND     | UND       | UND    | UND         | UND      | UND         | UND      |
| sme-miR-31b-5p    | UND        | UND     | UND        | UND     | UND       | UND    | UND         | UND      | 1.99        | UND      |
| api-miR-2a        | UND        | UND     | 1.94       | UND     | UND       | UND    | UND         | UND      | UND         | UND      |
| sme-lin-4-5p      | UND        | UND     | 2.45       | UND     | UND       | UND    | UND         | UND      | UND         | UND      |
| aly-miR403a-3p    | UND        | UND     | UND        | 1.02    | UND       | UND    | UND         | UND      | UND         | UND      |
| sme-bantam-a      | UND        | UND     | 1.57       | UND     | UND       | UND    | UND         | UND      | UND         | UND      |
| aae-miR-8-3p      | UND        | UND     | 1.14       | UND     | UND       | UND    | UND         | UND      | UND         | UND      |
| hsa-miR-629-5p    | UND        | UND     | 0.96       | UND     | UND       | UND    | UND         | UND      | UND         | UND      |
| asu-miR-86-5p     | UND        | UND     | 1.22       | UND     | UND       | UND    | UND         | UND      | UND         | UND      |
| ata-miR396e-3p    | UND        | UND     | 0.82       | UND     | UND       | UND    | UND         | UND      | UND         | UND      |
| aau-miR162        | UND        | UND     | UND        | 0.39    | UND       | UND    | UND         | UND      | UND         | UND      |
| aae-miR-34-5p     | UND        | UND     | 0.87       | UND     | UND       | UND    | UND         | UND      | UND         | UND      |
| ipu-miR-99b       | UND        | UND     | 0.12       | 0.34    | UND       | UND    | 0.14        | 0.09     | UND         | UND      |
| lva-miR-183-5p    | UND        | UND     | 0.07       | 0.06    | UND       | UND    | UND         | UND      | 0.36        | UND      |
| gma-miR171k-3p    | UND        | UND     | UND        | 0.56    | UND       | UND    | UND         | UND      | UND         | UND      |
| ahy-miR156b-5p    | UND        | UND     | UND        | 0.69    | UND       | UND    | UND         | UND      | UND         | UND      |
| hsa-miR-4661-5p   | UND        | UND     | UND        | 0.69    | UND       | UND    | UND         | UND      | UND         | UND      |
| gso-miR3522a      | UND        | UND     | UND        | 0.45    | UND       | UND    | UND         | UND      | UND         | UND      |
| hsa-miR-3605-3p   | UND        | UND     | 0.70       | UND     | UND       | UND    | UND         | UND      | UND         | UND      |
| hsa-miR-942-5p    | UND        | UND     | UND        | 0.61    | UND       | UND    | UND         | UND      | UND         | UND      |
| asu-miR-100a-5p   | UND        | UND     | 0.42       | UND     | UND       | UND    | UND         | UND      | UND         | UND      |
| osa-miR159f       | 0.12       | UND     | 0.41       | UND     | UND       | UND    | UND         | UND      | UND         | UND      |
| bta-miR-3613a     | UND        | UND     | 0.24       | UND     | UND       | UND    | UND         | UND      | UND         | UND      |
| aqc-miR159        | UND        | UND     | 0.41       | UND     | UND       | UND    | UND         | UND      | UND         | UND      |
| pma-miR-194-5p    | UND        | UND     | UND        | UND     | UND       | UND    | 0.12        | UND      | UND         | UND      |
| aae-miR-13-3p     | UND        | UND     | UND        | UND     | UND       | UND    | UND         | UND      | 0.18        | UND      |
| hsa-miR-1269b     | UND        | UND     | 0.18       | UND     | UND       | UND    | UND         | UND      | UND         | UND      |
| pde-miR159        | UND        | UND     | 0.31       | UND     | UND       | UND    | UND         | UND      | UND         | UND      |
| bbe-miR-183-5p    | UND        | UND     | UND        | 0.11    | UND       | UND    | UND         | UND      | UND         | UND      |
| bta-miR-374a      | UND        | UND     | UND        | UND     | UND       | UND    | UND         | 0.25     | UND         | UND      |
| hsa-miR-6803-3p   | UND        | UND     | 0.09       | 0.08    | UND       | UND    | UND         | UND      | UND         | UND      |
| aly-miR172c-3p    | UND        | UND     | UND        | 0.11    | UND       | UND    | UND         | UND      | UND         | UND      |
| bma-miR-57        | UND        | UND     | UND        | UND     | 0.06      | UND    | UND         | UND      | UND         | UND      |
| cbn-miR-81        | UND        | UND     | UND        | UND     | UND       | UND    | UND         | 0.12     | UND         | UND      |
| asu-miR-44a-3p    | UND        | UND     | UND        | UND     | UND       | UND    | UND         | 0.12     | UND         | UND      |
| cin-let-7b-5p     | UND        | UND     | 0.09       | UND     | UND       | UND    | UND         | UND      | UND         | UND      |
| aae-miR-71-5p     | UND        | 0.07    | UND        | UND     | UND       | UND    | UND         | UND      | UND         | UND      |
| cte-miR-100       | UND        | UND     | 0.06       | UND     | UND       | UND    | UND         | UND      | UND         | UND      |
| aae-miR-10        | UND        | UND     | UND        | UND     | UND       | UND    | UND         | 0.13     | UND         | UND      |
| dvi-miR-310-3p    | UND        | UND     | UND        | UND     | 0.07      | UND    | UND         | UND      | UND         | UND      |
| aga-miR-275       | UND        | UND     | UND        | UND     | UND       | UND    | UND         | 0.07     | UND         | UND      |
| efu-miR-23a       | UND        | UND     | UND        | 0.08    | UND       | UND    | UND         | UND      | UND         | UND      |
| hsa-miR-181a-2-3p | UND        | UND     | UND        | 0.08    | UND       | UND    | UND         | UND      | UND         | UND      |
| hsa-miR-4433a-3p  | UND        | UND     | UND        | 0.07    | UND       | UND    | UND         | UND      | UND         | UND      |
| cfa-miR-590       | UND        | UND     | 0.06       | UND     | UND       | UND    | UND         | UND      | UND         | UND      |
| hsa-miR-625-3p    | UND        | UND     | UND        | UND     | 0.07      | UND    | UND         | UND      | UND         | UND      |
| mml-miR-133a      | UND        | 0.07    | UND        | UND     | UND       | UND    | UND         | UND      | UND         | UND      |
| oha-miR-221-5p    | UND        | UND     | UND        | UND     | UND       | UND    | UND         | 0.09     | UND         | UND      |
| pma-miR-30d       | UND        | UND     | UND        | UND     | UND       | UND    | UND         | UND      | 0.06        | UND      |
| vvi-miR156e       | 0.12       | UND     | UND        | UND     | UND       | UND    | UND         | UND      | UND         | UND      |
| xtr-miR-106       | UND        | UND     | UND        | UND     | UND       | UND    | UND         | 0.07     | UND         | UND      |
| xtr-miR-215       | UND        | UND     | UND        | UND     | UND       | UND    | UND         | 0.07     | UND         | UND      |





**Figure 5-Source Data 3. Non-host rDRs (RPM)**

| Name           | APOB_SRBKO | APOB_WT   | Bile_SRBKO | Bile_WT | HDL_SRBKO | HDL_WT   | Liver_SRBKO | Liver_WT | Urine_SRBKO | Urine_WT |
|----------------|------------|-----------|------------|---------|-----------|----------|-------------|----------|-------------|----------|
| Bacteria       | 104478.09  | 114730.23 | 14291.84   | 3421.66 | 115759.51 | 91728.06 | 183.83      | 179.03   | 6799.78     | 24244.83 |
| Eukaryota      | 28441.08   | 24937.70  | 10932.99   | 5757.57 | 26842.12  | 31188.21 | 2449.16     | 3312.43  | 10555.64    | 16042.07 |
| Fungi          | 49869.36   | 34405.14  | 4707.79    | 1006.22 | 41715.80  | 30034.45 | 231.77      | 254.22   | 2355.37     | 5241.13  |
| Protists       | 23129.74   | 33023.18  | 4782.32    | 1215.89 | 18249.65  | 41609.68 | 79.35       | 70.98    | 1821.22     | 2813.75  |
| Archaeplastida | 34829.30   | 16663.40  | 7711.99    | 2775.75 | 17734.88  | 20892.10 | 108.43      | 128.65   | 1268.66     | 3120.96  |
| Embryophyta    | 9430.06    | 6939.73   | 1022.50    | 216.15  | 6597.24   | 6100.84  | 41.54       | 46.83    | 521.24      | 1288.62  |
| Archaea        | 21.59      | 89.19     | 15.87      | 5.46    | 72.70     | 37.15    | 0.14        | 0.20     | 13.44       | 82.41    |

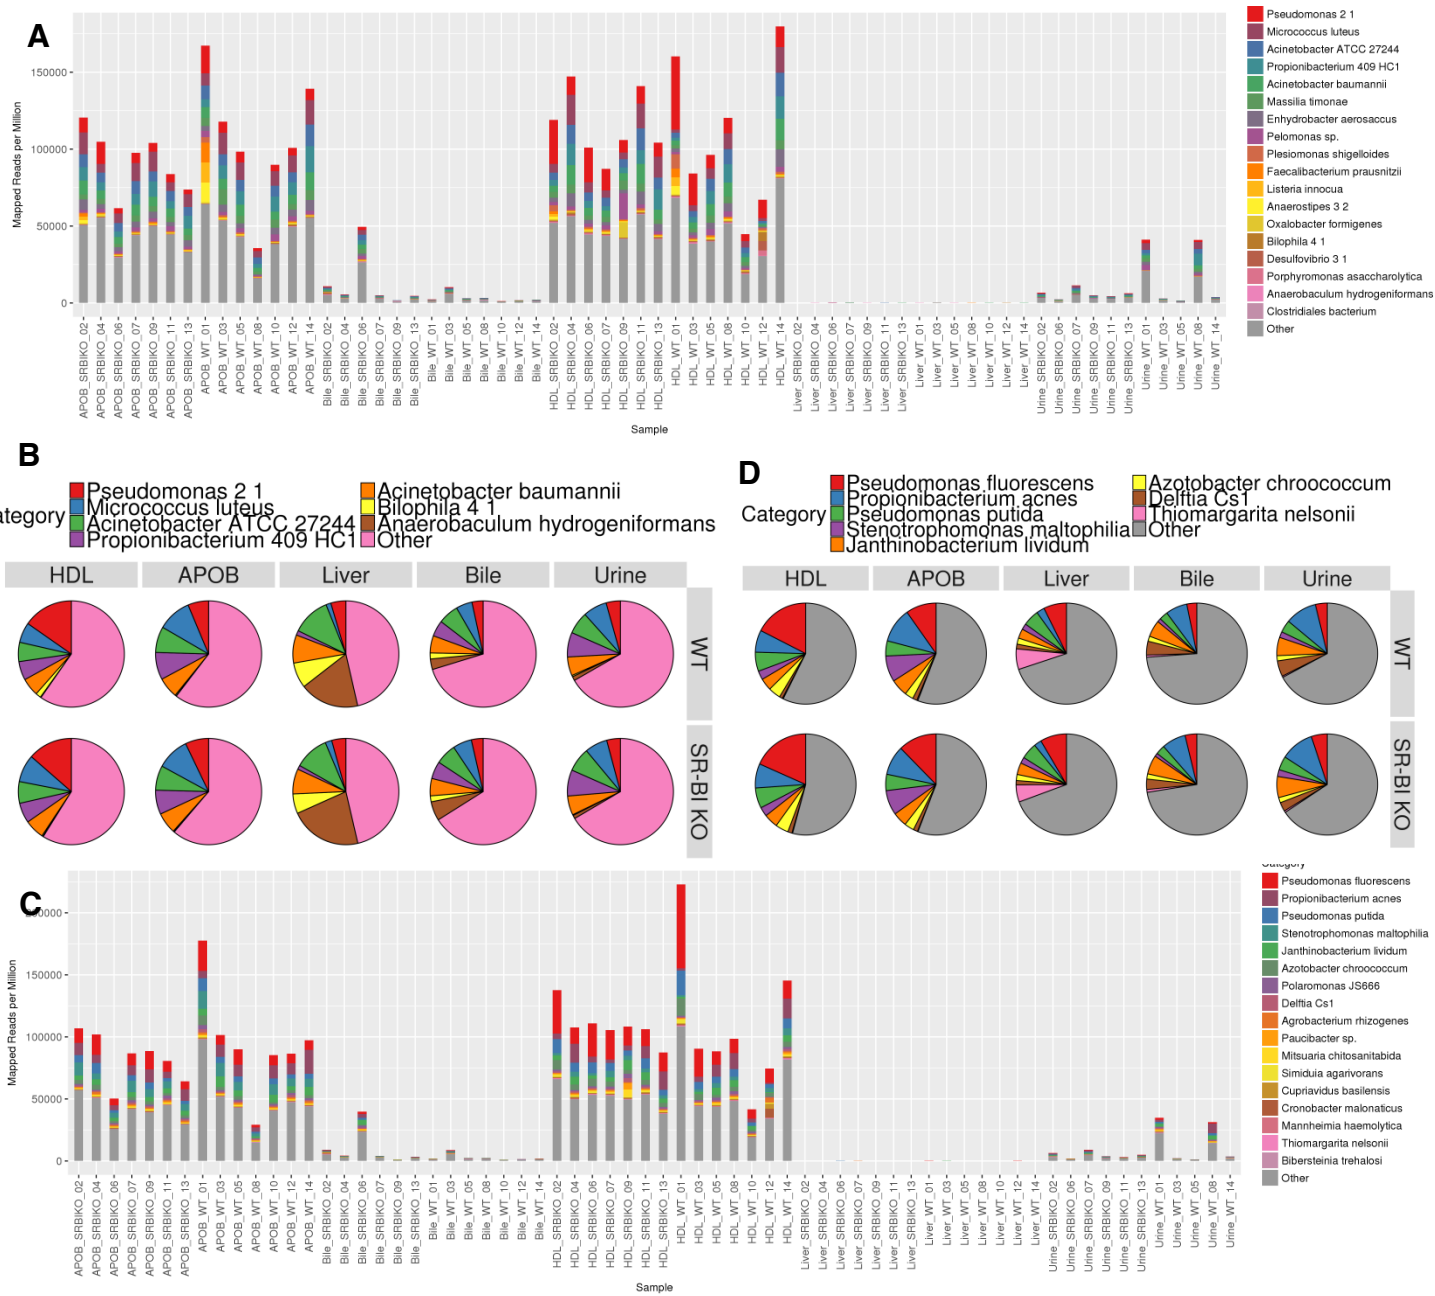

**Figure 6-Figure Supplement 1. Lipoproteins transport non-host bacterial sRNAs.** WT, wild-type mice; SR-BI KO, Scavenger receptor BI Knockout mice (*Scarb1*<sup>-/-</sup>). **(A)** Stacked bar plots of non-host sRNAs aligned to bacterial genomes in the human microbiome project (HMB), as reported as mapped reads per million total reads. **(B-C)** Pie charts illustrating the distribution of genome counts per total bacterial reads for species in the **(B)** HMB and **(C)** environment (ENV). **(D)** Stacked bar plots of non-host sDRs aligned to ENV bacterial genomes, as reported as mapped reads per million total reads. HDL WT, N=7; HDL SR-BI KO N=7; APOB WT, N=7, APOB SR-BI KO N=7; Liver WT, N=7; Liver SR-BI KO, N=7; Bile WT, N=7; Bile SR-BI KO, N=6; Urine WT, N=5; Urine SR-BI KO, N=6.

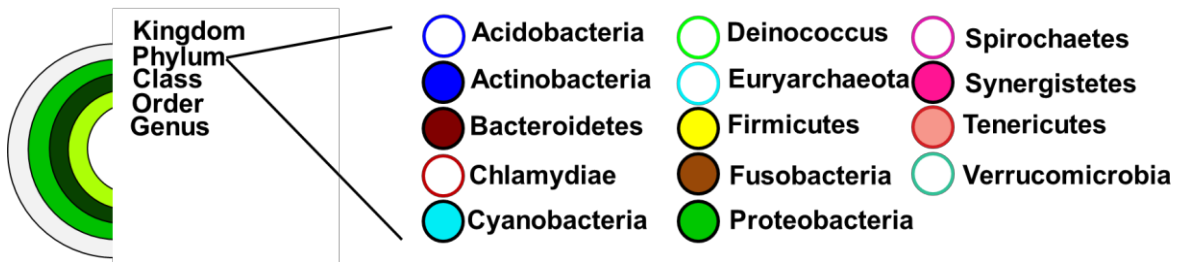

A

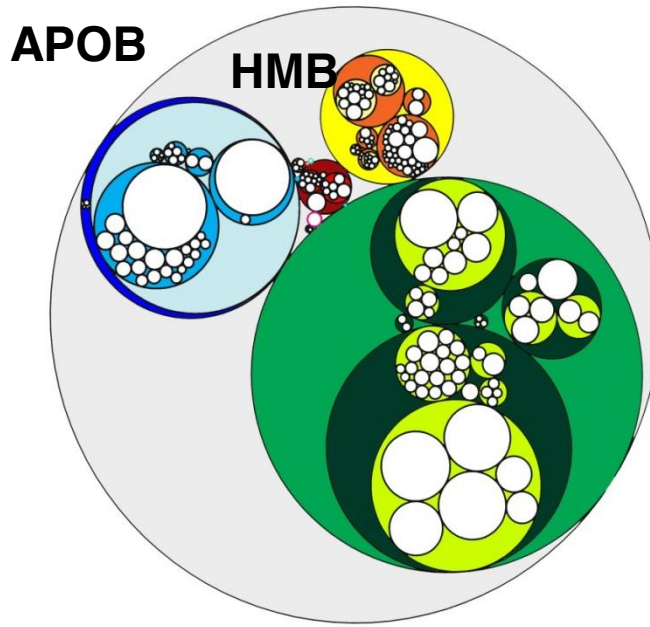

B

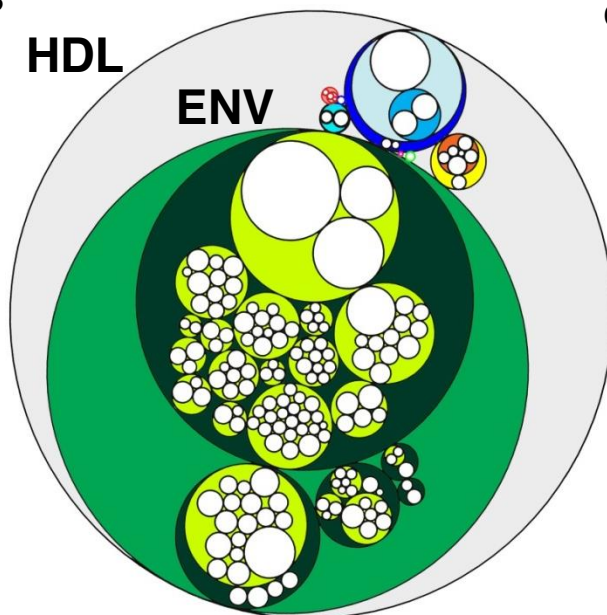

C

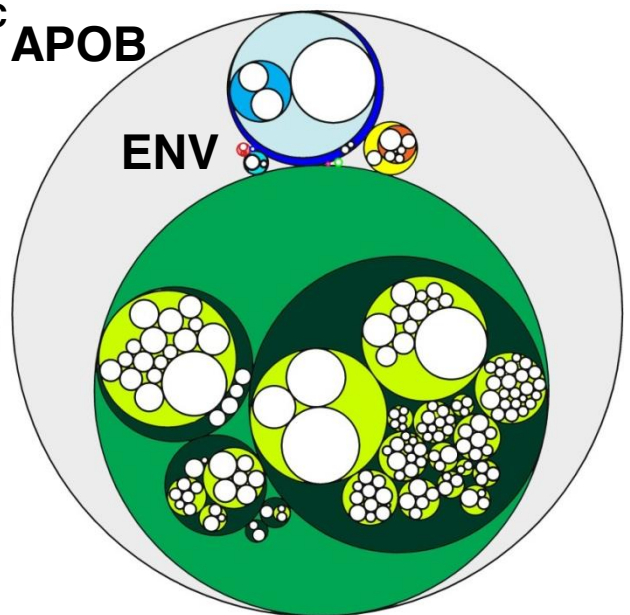

**Figure 6-Figure Supplement 2. Lipoproteins are enriched for proteobacteria sRNAs.** WT, wild-type mice; SR-BI KO, Scavenger receptor BI Knockout mice (*Scarb1*<sup>-/-</sup>). (A-C) Circular tree maps for non-host bacterial sRNAs on lipoproteins from WT mice, as organized by taxonomy – proteobacteria, green; actinobacteria, blue; firmicutes, yellow; bacteroidetes, red. Maps were generated from bacterial counts organized by species within the human microbiome project (HMB) on (A) APOB particles and bacterial species in the environment (ENV) on (B) HDL and (C) APOB particles. Diameter is proportional to the mean number of reads at the genome level (counts). HDL WT, N=7; APOB WT, N=7

Category ■ BothCategories ■ MicrobiomeOnly ■ EnvironmentOnly

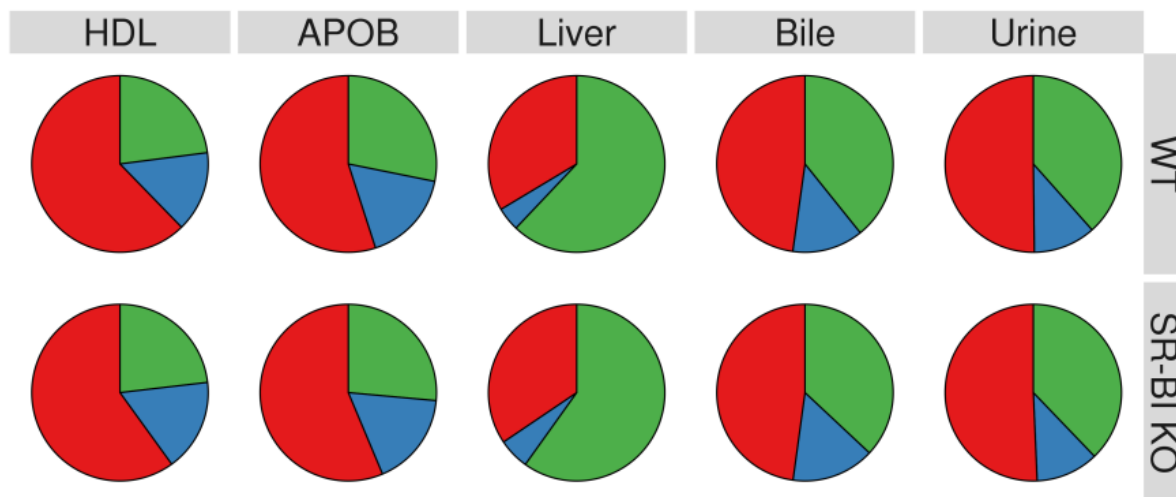

**Figure 6-Figure Supplement 3.** Lipoproteins transport non-host sRNAs from bacteria species specific for the microbiome or environment. Pie charts illustrating alignment overlap for non-host bacterial genome reads between species in the human microbiome project or environment. HDL WT, N=7; HDL SR-BI KO N=7; APOB WT, N=7, APOB SR-BI KO N=7; Liver WT, N=7; Liver SR-BI KO, N=7; Bile WT, N=7; Bile SR-BI KO, N=6; Urine WT, N=5; Urine SR-BI KO, N=6.

**A**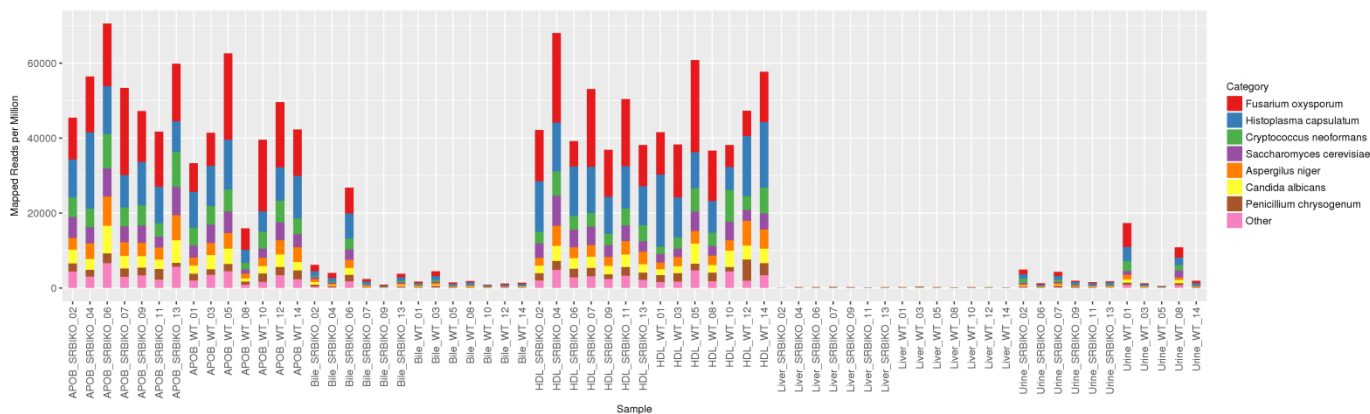**B**

Category

- Fusarium oxysporum
- Saccharomyces cerevisiae
- Histoplasma capsulatum
- Aspergillus niger
- Cryptococcus neoformans
- Other

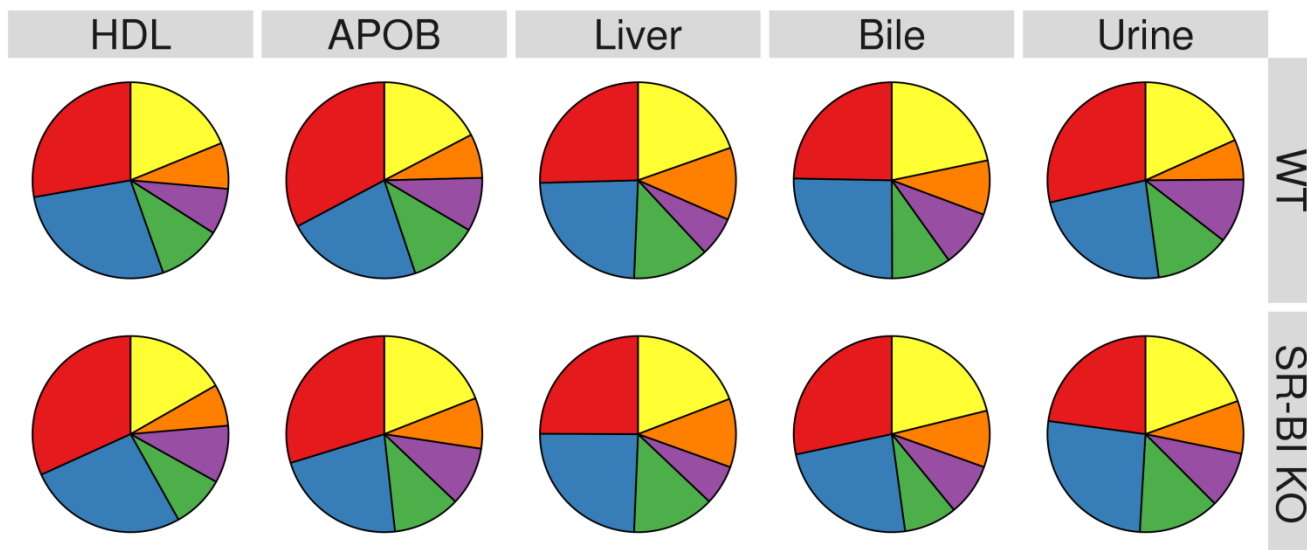

**Figure 6-Figure Supplement 4. Lipoproteins transport non-host fungal sRNAs.** WT, wild-type mice; SR-BI KO, Scavenger receptor BI Knockout mice (*Scarb1*<sup>-/-</sup>). **(A)** Stacked bar plots of non-host sRNAs aligned to fungal genomes, as reported as mapped reads per million total reads. **(B)** Pie charts illustrating the distribution of genome counts per total fungal reads. HDL WT, N=7; HDL SR-BI KO N=7; APOB WT, N=7, APOB SR-BI KO N=7; Liver WT, N=7; Liver SR-BI KO, N=7; Bile WT, N=7; Bile SR-BI KO, N=6; Urine WT, N=5; Urine SR-BI KO, N=6.

## Fungal sRNAs

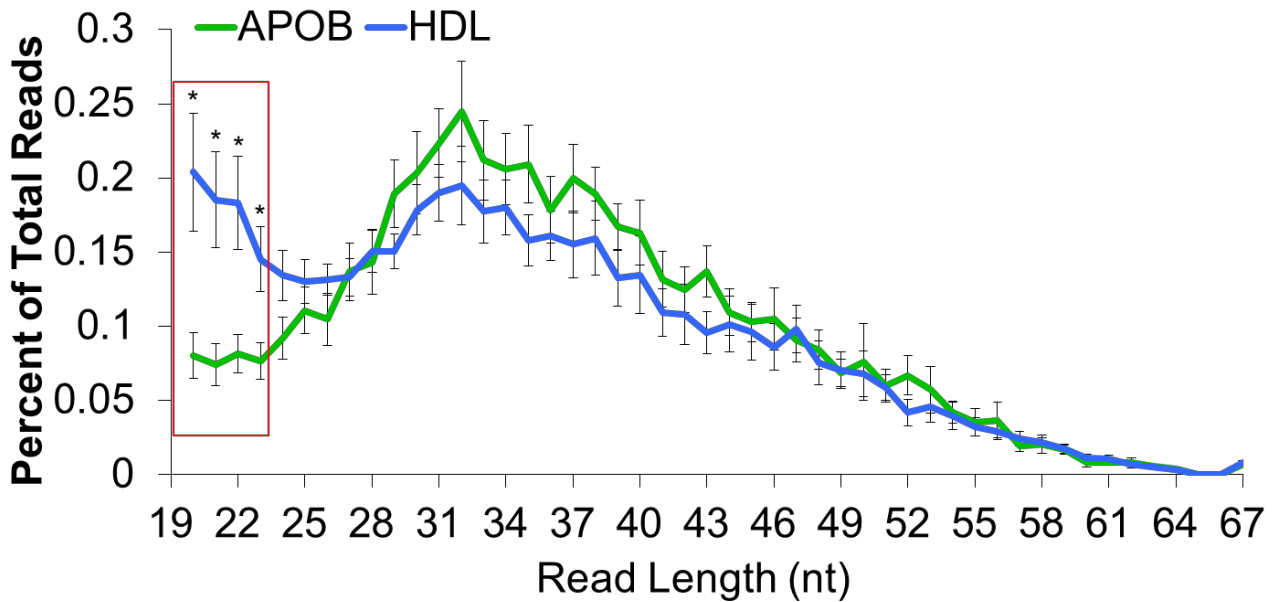

**Figure 6-Figure Supplement 5. HDL transport short fungal sRNAs.** Distribution of read lengths, as reported as percent of total reads, for non-host fungal sRNAs. Two-tailed Student's t-tests. \* $p < 0.05$ . HDL WT, N=7; HDL SR-BI KO N=7; APOB WT, N=7; APOB SR-BI KO N=7; Liver WT, N=7; Liver SR-BI KO, N=7; Bile WT, N=7; Bile SR-BI KO, N=6; Urine WT, N=5; Urine SR-BI KO, N=6.

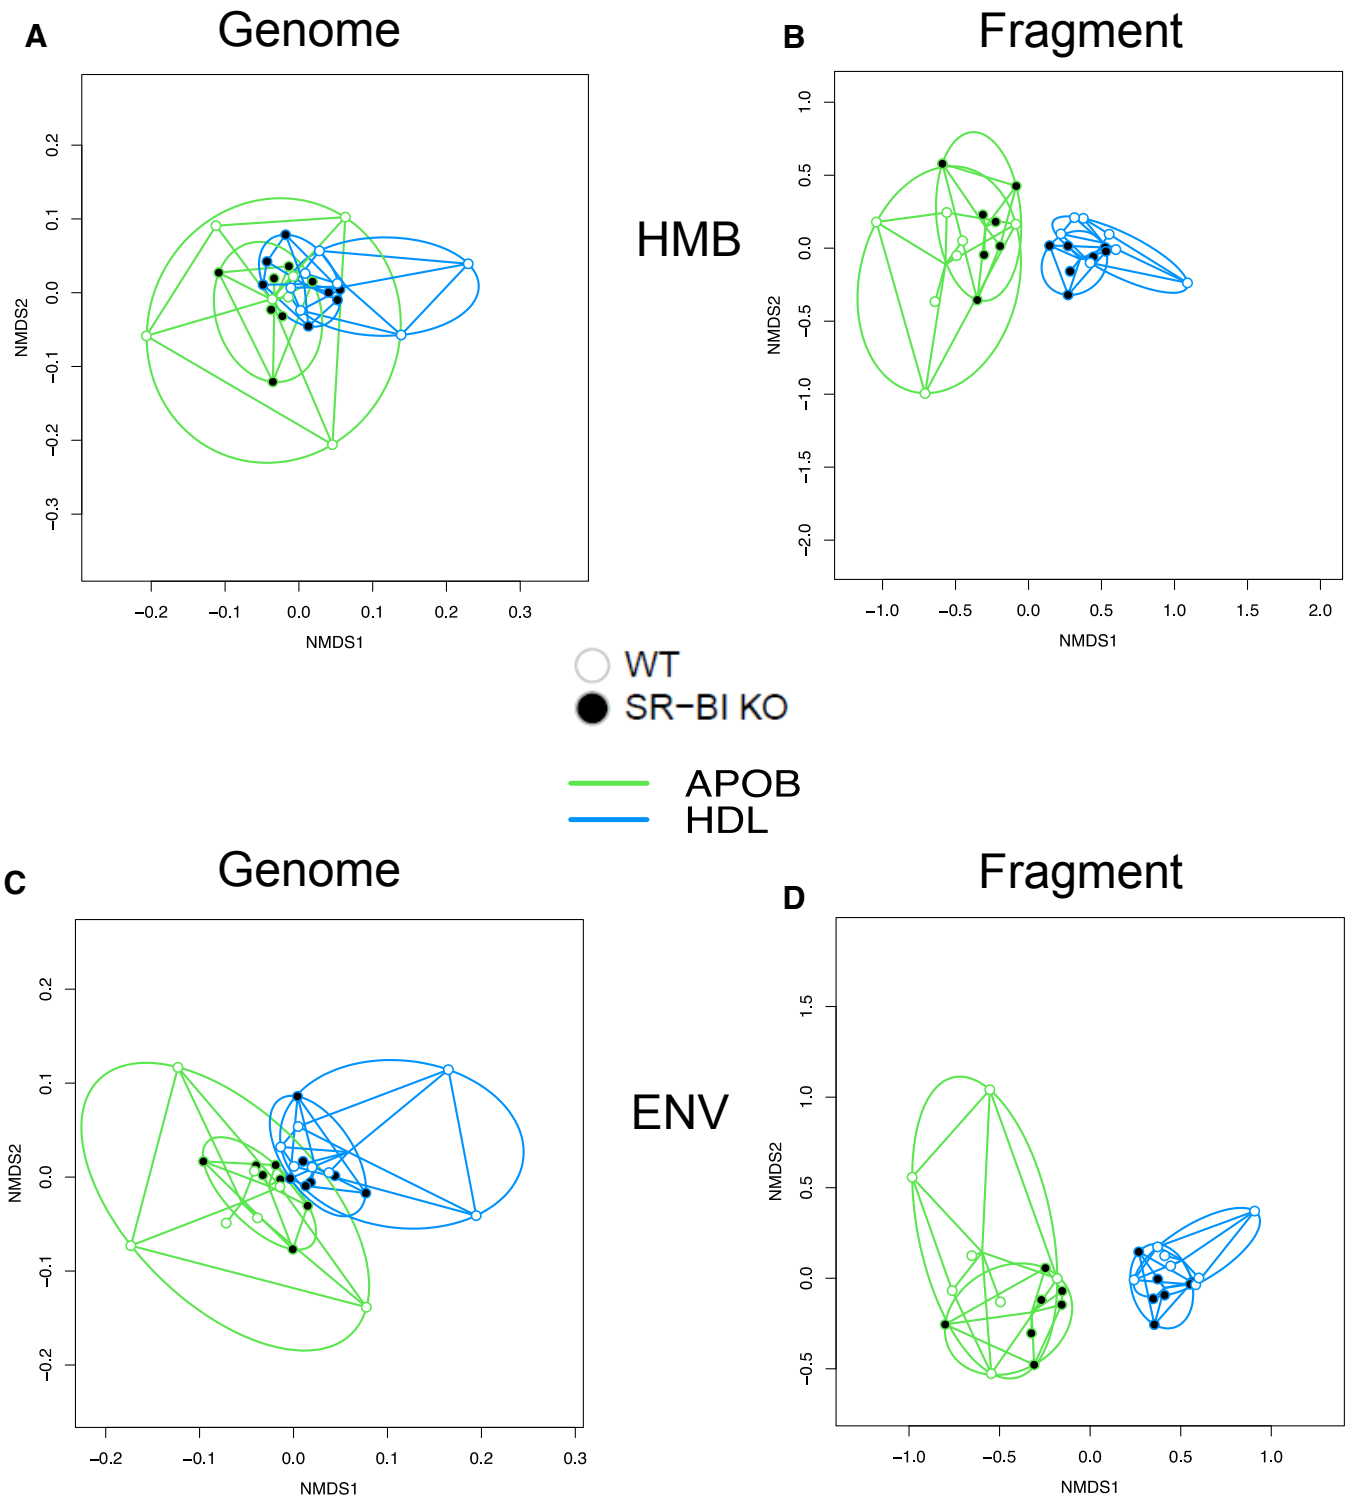

**Figure 6-Figure Supplement 6. HDL and APOB sRNA profiles are distinct. (A-D)** Principal Coordinate Analysis (PCoA) of non-host bacterial sRNA profiles based on **(A)** genome counts for species in the human microbiome project (HMB), **(B)** individual fragment counts for HMB, **(C)** genome counts for species in the environment (ENV), **(D)** individual fragment counts for ENV. NMDS1, Non-metric multidimensional scaling. WT (empty circles), wild-type mice; SR-BI KO (filled circles), Scavenger receptor BI Knockout mice (*Scarb1*<sup>-/-</sup>). HDL WT, N=7; HDL SR-BI KO N=7; APOB WT, N=7, APOB SR-BI KO N=7.



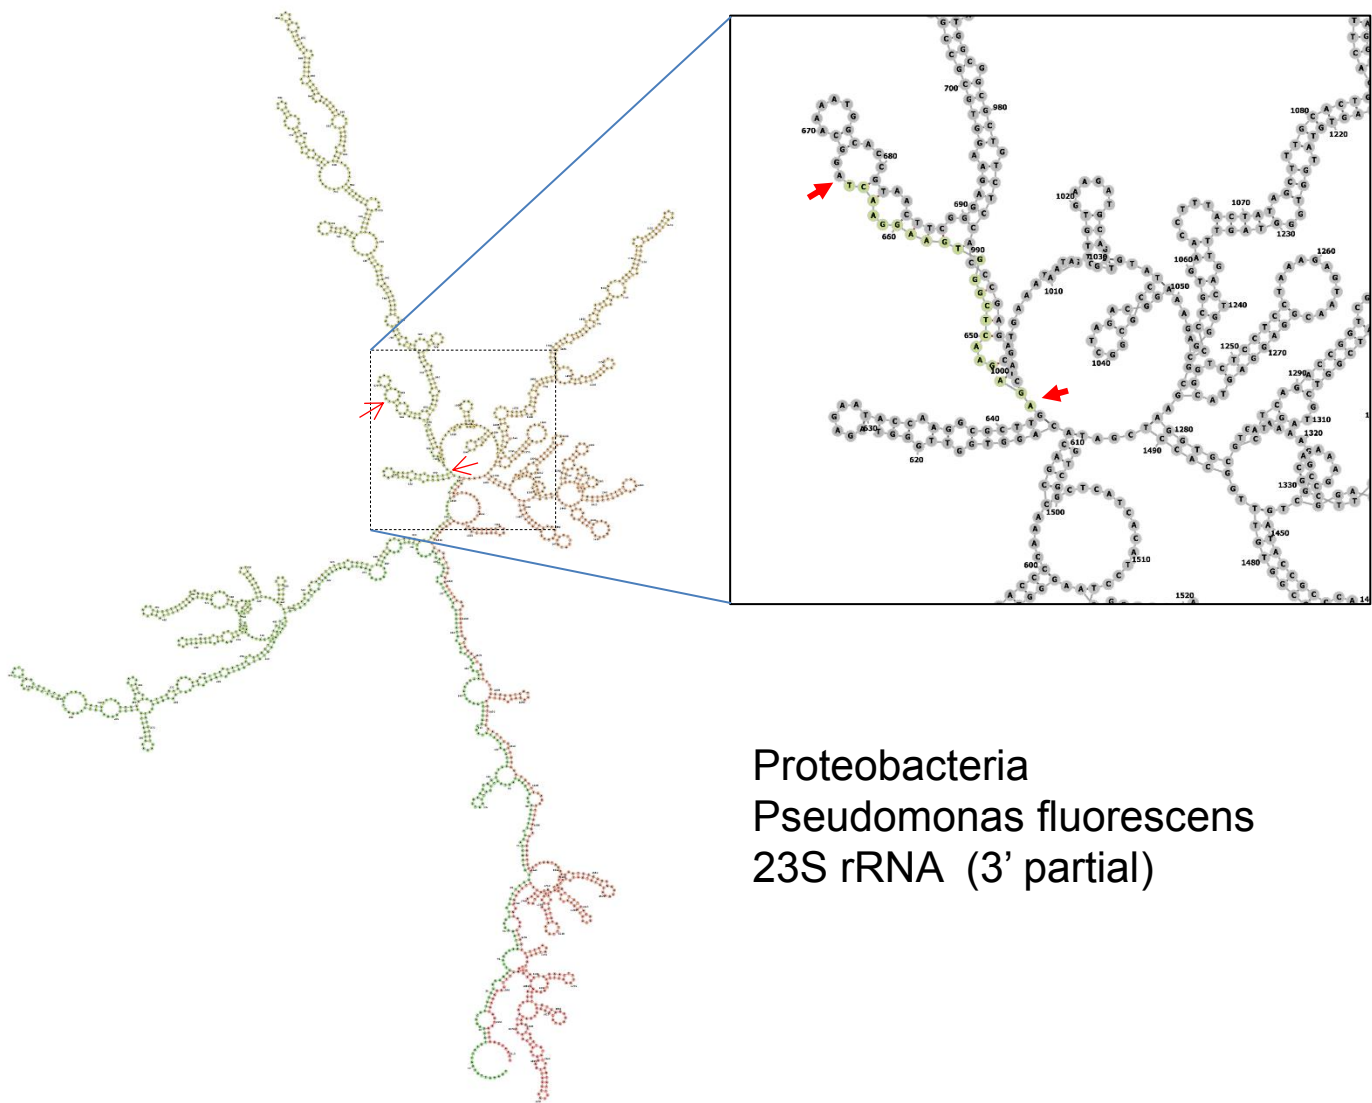

Proteobacteria  
*Pseudomonas fluorescens*  
23S rRNA (3' partial)

**Figure 6-Figure Supplement 7. Alignment of candidate (bacterial) sRNA to *Pseudomonas fluorescens* 23S rRNA.**

Proteobacteria  
*Janthinobacterium lividum*  
23S rRNA (3' partial)

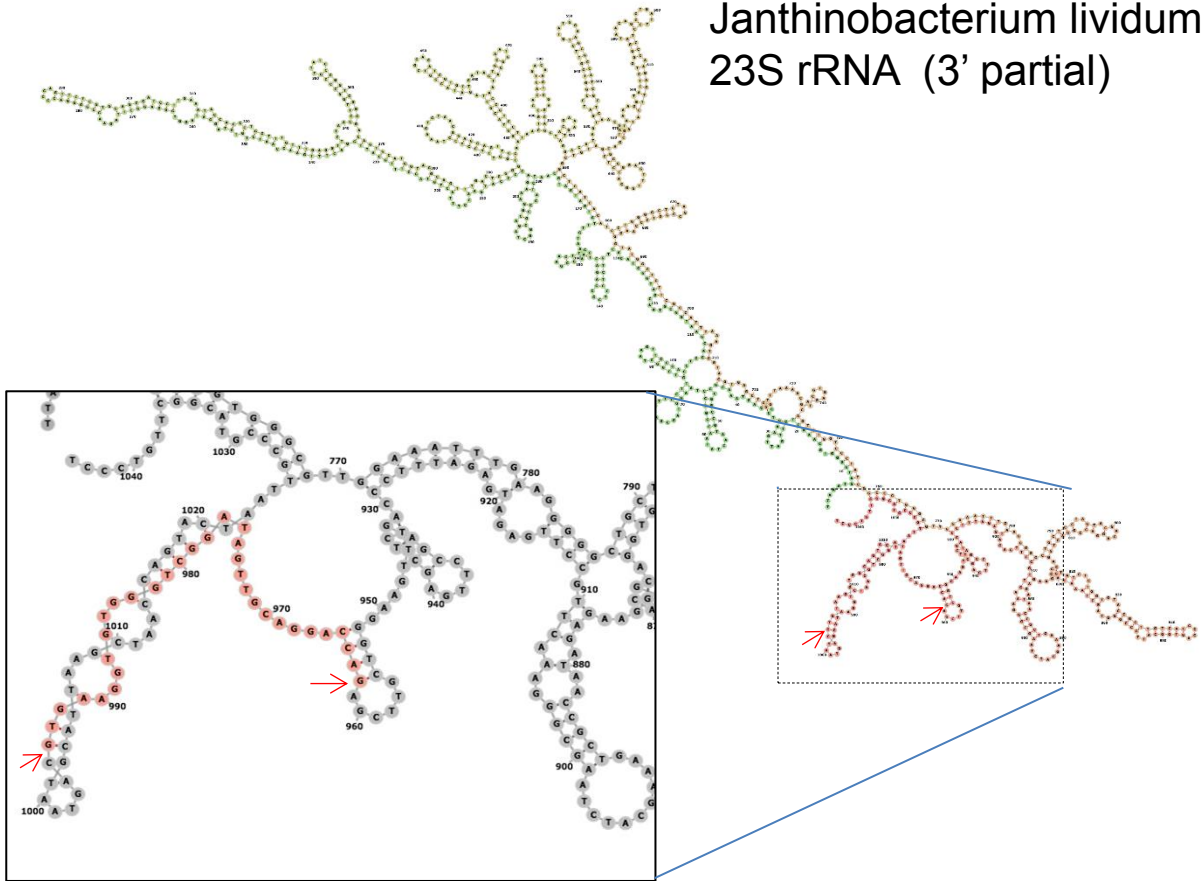

**Figure 6-Figure Supplement 8. Alignment of candidate (bacterial) sRNA to *Janthinobacterium lividum* 23S rRNA.**

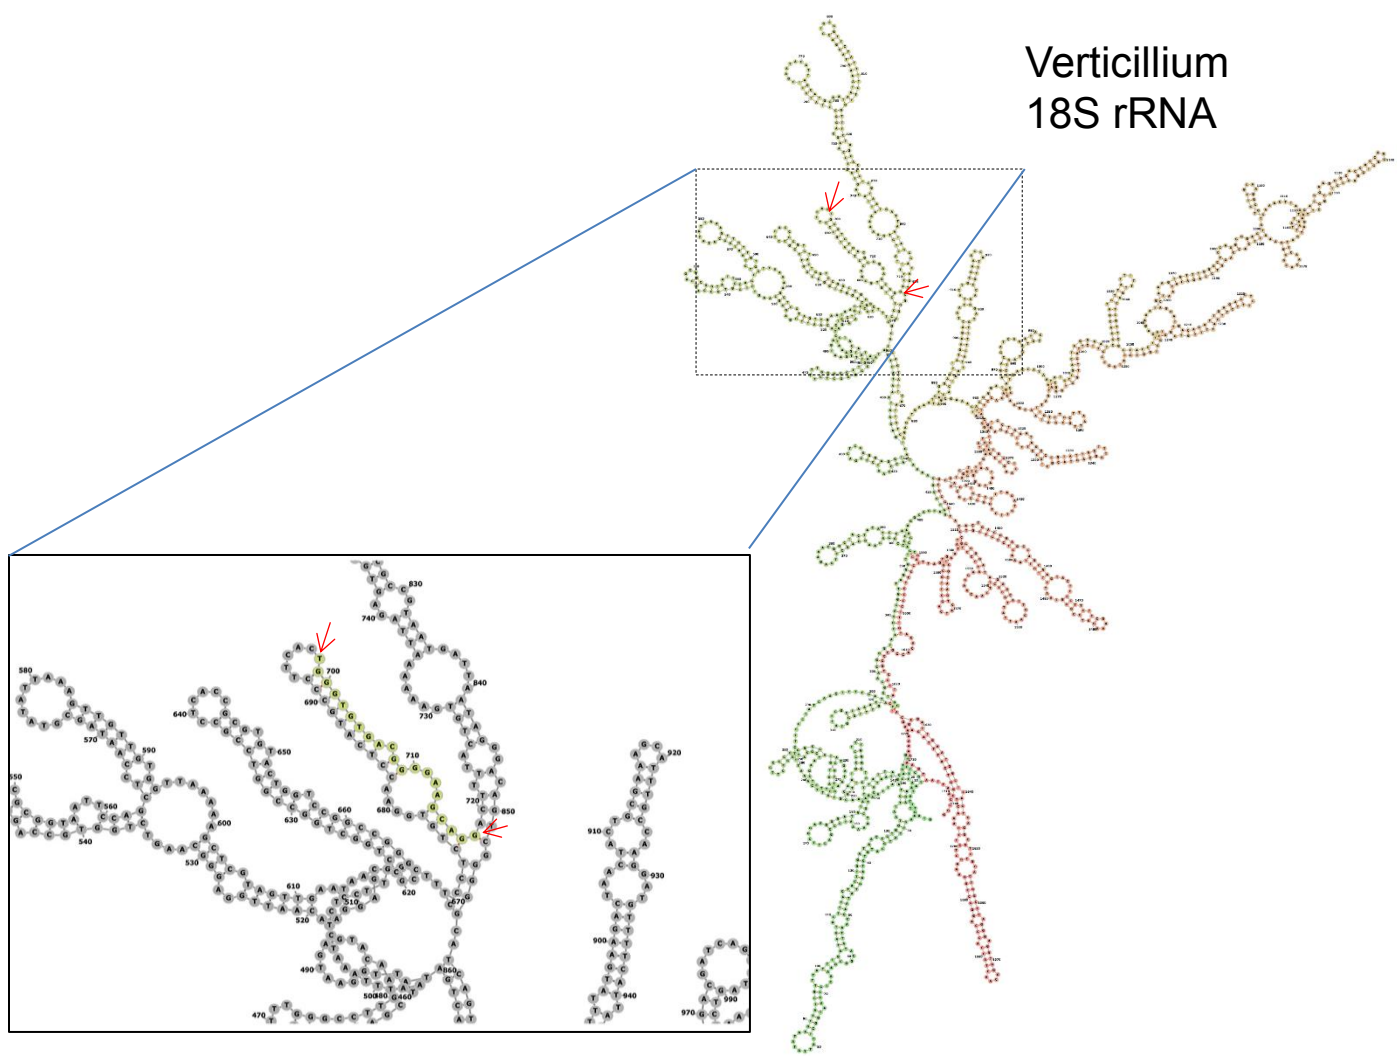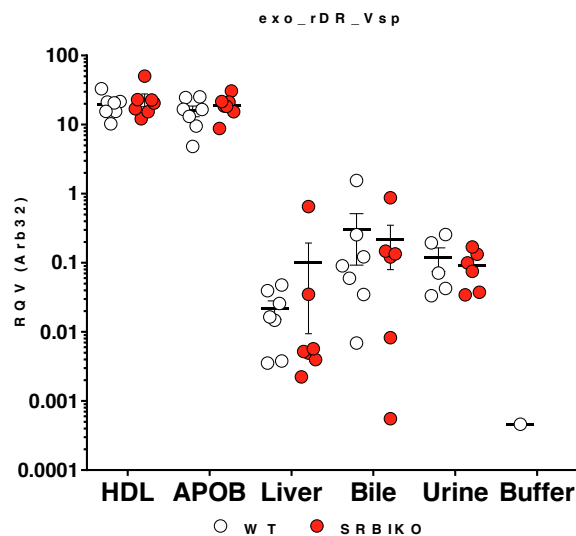

**Figure 6-Figure Supplement 9. HDL and APOB particles transport a non-host fungal sRNA.**

Alignment of candidate (fungal) sRNA to Verticillium 18S rRNA. Real-time PCR analysis of candidate non-host fungal sRNA for exogenous rDR Verticillium (exo\_rDR\_Vsp). WT (white circles), wild-type mice; SR-BI KO (red circles), Scavenger receptor BI Knockout mice (*Scarb1*<sup>-/-</sup>). HDL WT, N=7; HDL SR-BI KO N=7; APOB WT, N=7, APOB SR-BI KO N=7; Liver WT, N=7; Liver SR-BI KO, N=7; Bile WT, N=7; Bile SR-BI KO, N=6; Urine WT, N=5; Urine SR-BI KO, N=6.





**Figure 6-Source Data 3. Fungi genome counts (RPM).**

| Name                     | APOB_SRBKO | APOB_WT  | Bile_SRBKO | Bile_WT | HDL_SRBKO | HDL_WT   | Liver_SRBKO | Liver_WT | Urine_SRBKO | Urine_WT |
|--------------------------|------------|----------|------------|---------|-----------|----------|-------------|----------|-------------|----------|
| Fusarium oxysporum       | 15697.31   | 13445.86 | 1985.14    | 484.95  | 15232.19  | 12801.52 | 55.62       | 64.89    | 625.11      | 2035.88  |
| Histoplasma capsulatum   | 11619.72   | 8980.51  | 1758.06    | 462.04  | 11951.41  | 12543.87 | 55.50       | 62.33    | 666.78      | 1353.75  |
| Cryptococcus neoformans  | 6092.29    | 4555.52  | 715.64     | 189.93  | 4101.03   | 4807.55  | 31.26       | 32.02    | 411.08      | 890.61   |
| Aspergillus niger        | 4590.69    | 2946.05  | 655.30     | 163.19  | 3249.87   | 3510.84  | 24.91       | 31.29    | 219.94      | 428.96   |
| Saccharomyces cerevisiae | 5242.12    | 3677.24  | 703.68     | 182.38  | 4508.99   | 3477.47  | 15.09       | 17.24    | 236.91      | 657.88   |
| Candida albicans         | 4112.73    | 2637.75  | 560.19     | 138.97  | 2775.14   | 3253.02  | 17.48       | 21.20    | 162.02      | 378.08   |
| Candida glabrata         | 4061.29    | 2621.49  | 480.75     | 119.12  | 2970.40   | 2787.33  | 11.13       | 12.13    | 156.30      | 365.26   |
| Penicillium chrysogenum  | 2112.64    | 1827.06  | 500.09     | 146.18  | 2069.63   | 2620.23  | 14.77       | 18.36    | 175.03      | 283.32   |

**Figure 6-Source Data 4. Multivariate analysis of non-host sRNA profiles (WT only).**

| Comparison  | Class       | Level    | Dispersion_Fvalue | Dispersion_pvalue | Permanova_Fvalue | Permanova_pvalue |
|-------------|-------------|----------|-------------------|-------------------|------------------|------------------|
| APOB vs HDL | Microbiome  | Parent   | 62.30             | 1.18E-15          | 0.46             | 7.49E-01         |
| APOB vs HDL | Environment | Parent   | 59.02             | 3.68E-15          | 0.37             | 7.87E-01         |
| APOB vs HDL | Fungi       | Parent   | 54.10             | 2.11E-14          | 0.09             | 9.78E-01         |
| APOB vs HDL | Microbiome  | fragment | 27.46             | 2.66E-09          | 1.52             | 9.40E-02         |
| APOB vs HDL | Environment | fragment | 32.39             | 2.11E-10          | 1.70             | 4.80E-02         |
| APOB vs HDL | Fungi       | fragment | 30.00             | 7.03E-10          | 1.42             | 1.10E-01         |

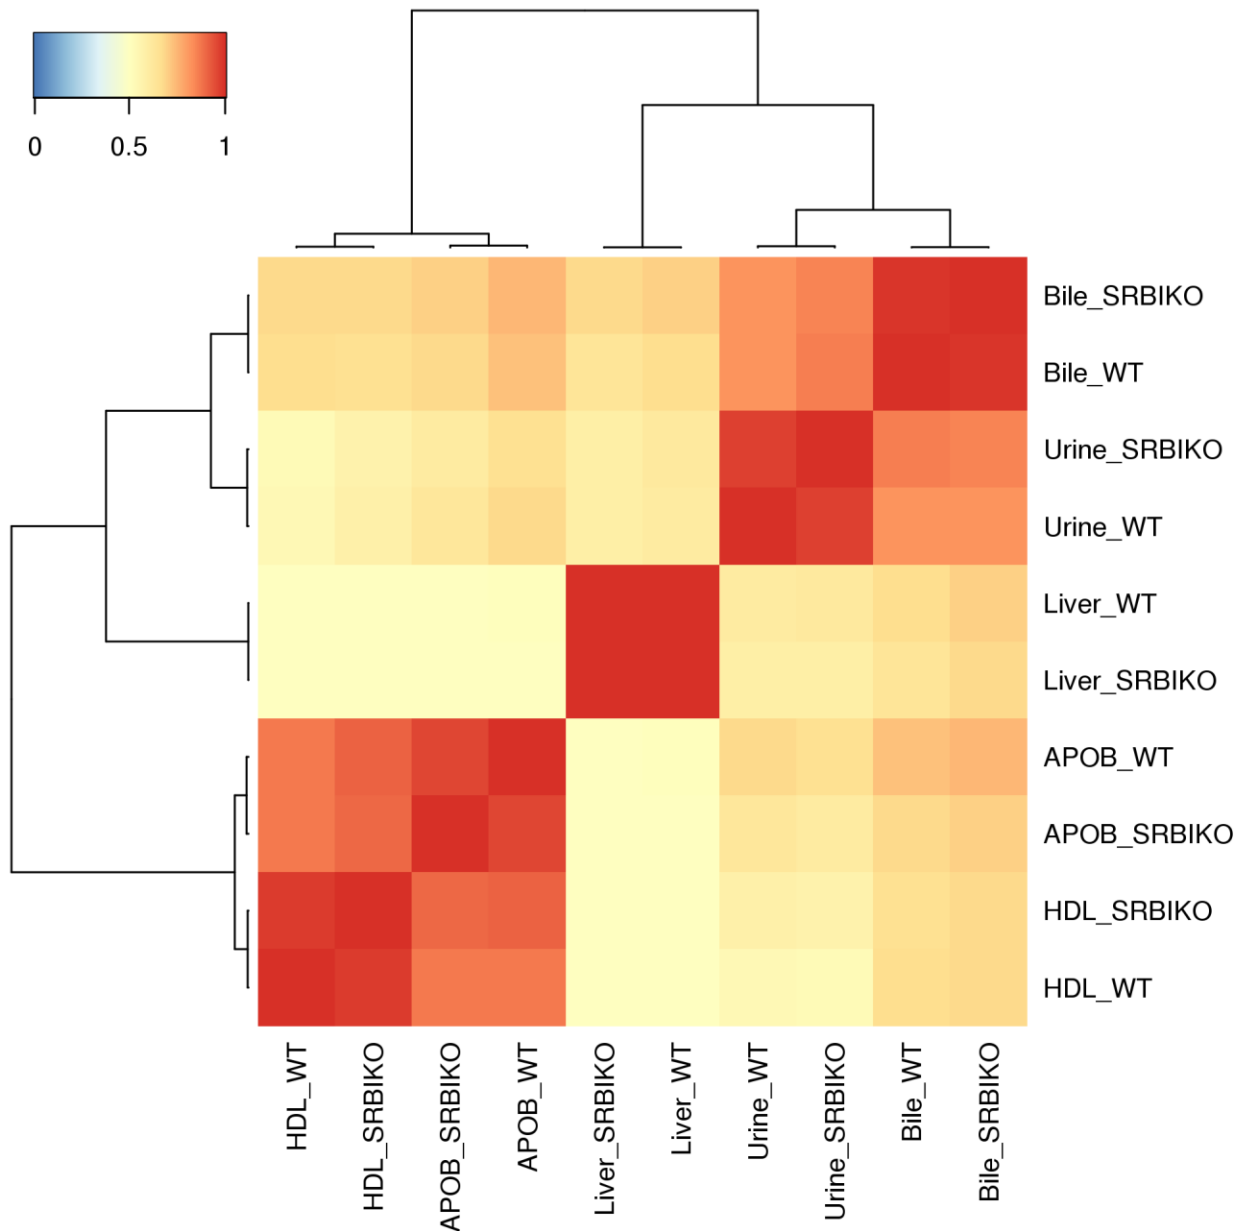

**Figure 7-Figure Supplement 1. Correlation of sample types based on the most abundant sRNAs.** Heatmap of hierarchical clustered pairwise correlation (Spearman, R) coefficients between group means for the top ranked (collective top 100 non-redundant) sRNAs for each group. WT, wild-type mice; SR-BI KO, Scavenger receptor BI Knockout mice (*Scarb1<sup>-/-</sup>*). HDL WT, N=7; HDL SR-BI KO N=7; APOB WT, N=7, APOB SR-BI KO N=7; Liver WT, N=7; Liver SR-BI KO, N=7; Bile WT, N=7; Bile SR-BI KO, N=6; Urine WT, N=5; Urine SR-BI KO, N=6.



**Figure 7-Source Data 1. Multivariate analysis of class-independent sRNA profiles compared to liver .**

| Group | Class_level | Comparison      | Dispersion_Fvalue | Dispersion_pvalue | Permanova_Fvalue | Permanova_pvalue |
|-------|-------------|-----------------|-------------------|-------------------|------------------|------------------|
| APOB  | Independent | APOB vs. Liver  | 16.83             | 1.47E-03          | 19.56            | 2.00E-03         |
| Bile  | Independent | Bile vs. Liver  | 2.76              | 1.22E-01          | 49.74            | 3.00E-03         |
| HDL   | Independent | HDL vs. Liver   | 80.90             | 1.11E-06          | 15.71            | 1.00E-03         |
| Urine | Independent | Urine vs. Liver | 7.02              | 2.44E-02          | 22.07            | 2.00E-03         |
| APOB  | Independent | APOB vs Bile    | 4.19              | 6.31E-02          | 10.08            | 2.00E-03         |
| APOB  | Independent | APOB vs HDL     | 0.92              | 3.58E-01          | 2.62             | 2.00E-03         |
| APOB  | Independent | APOB vs Urine   | 0.06              | 8.16E-01          | 5.83             | 2.00E-03         |
| Bile  | Independent | Bile vs HDL     | 14.51             | 2.49E-03          | 11.18            | 1.00E-03         |
| Bile  | Independent | Bile vs Urine   | 1.75              | 2.16E-01          | 8.01             | 2.00E-03         |

**A**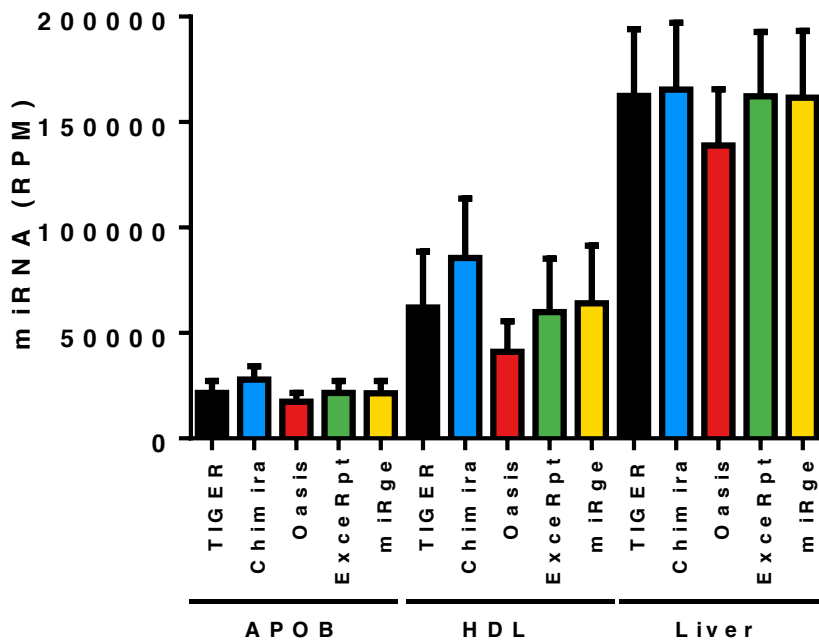**B**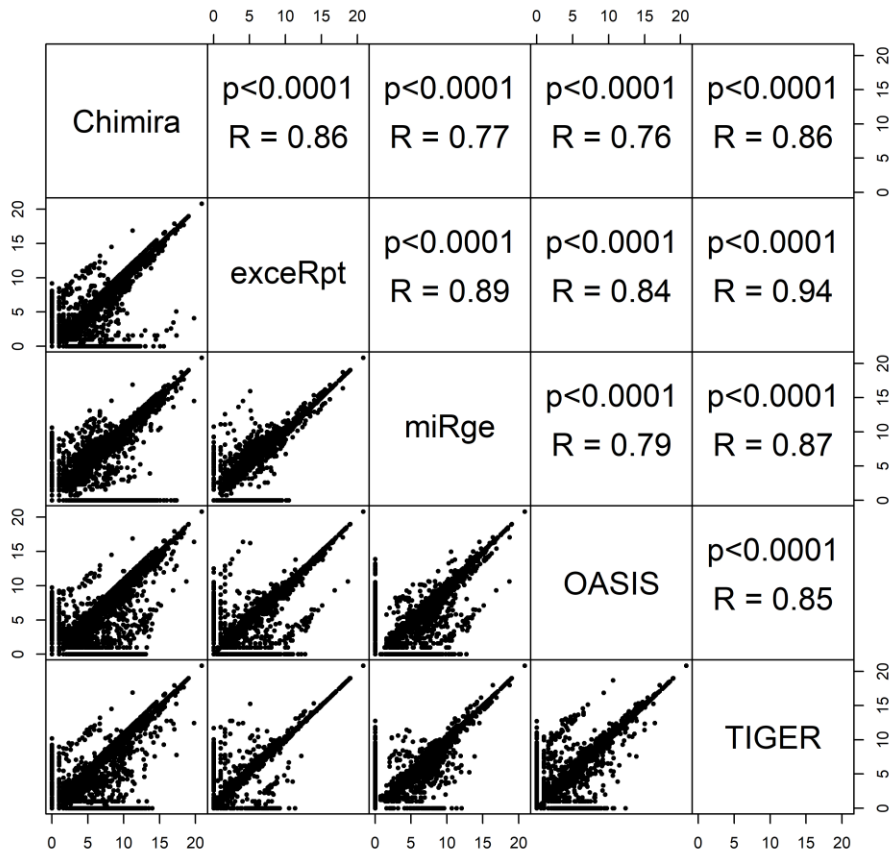

**Figure 8-Figure Supplement 1. TIGER pipeline comparison for canonical miRNA analysis. (A)** sRNA-seq analysis of canonical miRNAs for different pipelines, as reported as miRNAs Reads Per Million (RPM) total reads, for WT HDL, APOB, and liver samples. **(B)** Correlations between different analysis pipelines for canonical miRNAs in WT HDL, APOB, and liver samples. Spearman correlation. HDL WT, N=7; APOB WT, N=7, Liver WT, N=7.

**Figure 8-Source Data 1. TIGER comparisons to other pipelines**

| <b>Feature</b>                | <b>TIGER</b> | <b>Chimira</b> | <b>Oasis</b> | <b>ExceRpt</b>  | <b>miRge</b> |
|-------------------------------|--------------|----------------|--------------|-----------------|--------------|
| <b>Web frontend</b>           | N            | Y              | Y            | Y               | N            |
| <b>Alignment tool</b>         | Bowtie       | BLASTn         | STAR         | Bowtie          | Bowtie       |
| <b>Alignment Strategy</b>     | ome/Data     | Database       | Database     | Genome/Database | Database     |
| <b>Host miRNAs</b>            | Y            | Y              | Y            | Y               | Y            |
| <b>Novel miRNAs</b>           | N            | N              | Y            | N               | N            |
| <b>isomiRs</b>                | Y            | Y              | N            | N               | Y            |
| <b>NTAs</b>                   | Y            | Y              | N            | N               | Y            |
| <b>miRNA SNPs and Editing</b> | N            | Y              | N            | N               | Y            |
| <b>Non-host miRNAs</b>        | Y            | N              | Y            | Y               | Y            |
| <b>tDR</b>                    | Y            | N              | N            | Y               | Y            |
| <b>lncDR</b>                  | Y            | N              | N            | Y               | Y            |
| <b>snoDR</b>                  | Y            | N              | Y            | Y               | Y            |
| <b>snDR</b>                   | Y            | N              | Y            | Y               | Y            |
| <b>miscRNA</b>                | Y            | N              | N            | Y               | Y            |
| <b>piRNA</b>                  | N            | N              | Y            | Y               | N            |
| <b>rDR</b>                    | Y            | N              | Y            | Y               | Y            |
| <b>circRNA</b>                | N            | N              | N            | Y               | N            |
| <b>Bacteria</b>               | Y            | N              | Y            | Y               | N            |
| <b>Archaea</b>                | N            | N              | Y            | Y               | N            |
| <b>Virus</b>                  | N            | N              | Y            | Y               | N            |
| <b>Fungi</b>                  | Y            | N              | N            | Y               | N            |
| <b>Non-host tDR</b>           | Y            | N              | N            | N               | N            |
| <b>Non-host rDR</b>           | Y            | N              | N            | Y               | N            |
| <b>Normalization</b>          | DESeq2       | DEseq2         | DESeq2       | N               | RPMmicrona   |
| <b>DE</b>                     | DEseq2       | DEseq2         | DESeq2       | N               | N            |
| <b>DE 2 groups</b>            | Y            | Y              | N            | N               | N            |
| <b>DE Multivariate</b>        | N            | N              | Y            | N               | N            |
| <b>Classification</b>         | N            | N              | Y            | N               | N            |
| <b>GO</b>                     | N            | N              | N            | N               | N            |
| <b>Pathway</b>                | N            | N              | N            | N               | N            |
| <b>Data Vizualization</b>     | Y            | Y              | Y            | Y               | Y            |
| <b>batch</b>                  | Y            | Y              | Y            | Y               | Y            |

Figure 8-Source Data 2. TIGER summary output table

|                                 | APOB_SRBICO | APOB_WT     | Bile_SRBICO | Bile_WT     | HDL_SRBICO  | HDL_WT      | Liver_SRBICO | Liver_WT   | Urine_SRBICO | Urine_WT    |
|---------------------------------|-------------|-------------|-------------|-------------|-------------|-------------|--------------|------------|--------------|-------------|
| <b>Total Reads</b>              | 10196709.57 | 10426434.00 | 12611515.50 | 14416869.43 | 11002029.43 | 11839204.29 | 7838441.86   | 9019201.29 | 41206902.67  | 13495370.20 |
| <b>Total Host</b>               | 2003891.42  | 2671368.58  | 9685697.66  | 12028412.90 | 2550703.46  | 2896888.46  | 6857275.57   | 7841642.73 | 33782075.02  | 10371862.86 |
| <b>Total Non-Host</b>           | 3713751.43  | 3630707.71  | 614156.00   | 244993.57   | 3757938.29  | 3856228.71  | 26809.14     | 39649.00   | 1060624.00   | 803242.20   |
| <b>Too Short</b>                | 349226.43   | 185342.29   | 516190.00   | 405730.86   | 993402.29   | 1714684.14  | 33616.14     | 46629.57   | 1227994.33   | 333724.00   |
| <b>Unmapped</b>                 | 4129840.29  | 3939015.43  | 1795471.83  | 1737732.14  | 3699985.43  | 3371403.00  | 920741.00    | 1091280.00 | 5136209.33   | 1986541.20  |
| <b>Total Assigned</b>           | 6066869.28  | 6487418.58  | 10816043.66 | 12679137.33 | 7302044.03  | 8467801.32  | 6917700.86   | 7927921.30 | 36070693.35  | 11508829.06 |
| <b>%assigned</b>                | 0.5950      | 0.6222      | 0.8576      | 0.8795      | 0.6637      | 0.7152      | 0.8825       | 0.8790     | 0.8754       | 0.8528      |
|                                 | Host        |             |             |             |             |             |              |            |              |             |
| <b>Host Total sRNA</b>          | 1914365.56  | 2567869.58  | 9142975.49  | 11749523.62 | 2340102.46  | 2599891.46  | 6338489.14   | 7151785.44 | 33549187.02  | 10208411.06 |
| <b>Host_genome_miRNAs</b>       | 351802.34   | 238748.81   | 721278.22   | 818896.40   | 592698.41   | 953958.69   | 1094634.13   | 1604115.51 | 421902.32    | 103311.80   |
| <b>Host_genome_rDRs</b>         | 667283.73   | 797402.51   | 1064988.10  | 1238583.41  | 1005522.01  | 990735.86   | 3475737.93   | 3947849.40 | 7595901.73   | 2628239.78  |
| <b>Host_genome_snoDRs</b>       | 13087.47    | 22021.84    | 35746.53    | 24456.91    | 20199.77    | 15443.81    | 1483539.89   | 1113488.01 | 55134.10     | 60582.94    |
| <b>Host_genome_snDRs</b>        | 26653.61    | 25355.51    | 65127.00    | 66221.54    | 124622.37   | 107456.56   | 13723.73     | 22817.17   | 22426.18     | 20723.36    |
| <b>Host_genome_tDRs</b>         | 810224.36   | 1455182.47  | 7212599.28  | 9563855.07  | 567157.56   | 486575.10   | 235225.47    | 402458.97  | 25360776.53  | 7343478.26  |
| <b>Host_genome_lincDRs</b>      | 4192.43     | 7784.57     | 15092.00    | 11871.14    | 5238.71     | 9543.43     | 3963.43      | 5166.43    | 43599.17     | 12545.40    |
| <b>Host_genome_yDRs</b>         | 5947.14     | 5402.00     | 10053.67    | 11279.57    | 10069.71    | 7292.29     | 2582.00      | 4789.57    | 36221.33     | 30091.40    |
| <b>Host_genome_misc_RNA</b>     | 35174.86    | 15971.86    | 18090.33    | 14360.29    | 14593.00    | 28885.29    | 29082.57     | 51100.00   | 13224.83     | 9438.40     |
| <b>Host_genome_non-sRNA</b>     | 89525.86    | 103499.00   | 542722.17   | 278889.29   | 210601.00   | 296997.00   | 518786.43    | 689857.29  | 232888.00    | 163451.80   |
|                                 | Non-Host    |             |             |             |             |             |              |            |              |             |
| <b>Non-Host_Genome Total</b>    |             |             |             |             |             |             |              |            |              |             |
| <b>Bacteria_HMB</b>             | 941383.69   | 1148866.43  | 135118.65   | 47241.43    | 1241479.42  | 1272444.32  | 2071.43      | 2521.45    | 206615.46    | 202763.60   |
| <b>Bacteria_ENV</b>             | 845390.42   | 1010546.86  | 107792.36   | 38850.68    | 1228060.12  | 1359575.02  | 1299.42      | 1622.86    | 159180.67    | 164687.40   |
| <b>Fungus</b>                   | 542475.86   | 422503.86   | 78347.00    | 25885.57    | 516255.72   | 530335.14   | 1686.72      | 2375.29    | 83798.34     | 74262.19    |
| <b>Non-Host_Library Total</b>   |             |             |             |             |             |             |              |            |              |             |
| <b>Non_Host_genome_xenomiRs</b> | 574.86      | 279.14      | 1524.83     | 916.57      | 767.43      | 1135.29     | 43.86        | 64.14      | 201.67       | 86.20       |
| <b>Non_Host_genome_rDRs</b>     | 2577912.00  | 2441756.15  | 458196.00   | 185914.86   | 2364865.00  | 2361221.00  | 23720.01     | 35672.72   | 832834.67    | 611805.40   |
| <b>Non_Host_genome_tDRs</b>     | 189318.57   | 279545.43   | 35602.67    | 16303.14    | 278360.86   | 307671.71   | 634.14       | 886.14     | 59774.00     | 45919.59    |

Figure 8-Source Data 3. Comparisons to other

| Feature                 | APOB        |             |             |             |             | HDL         |             |             |             |             | Liver      |            |            |            |             |
|-------------------------|-------------|-------------|-------------|-------------|-------------|-------------|-------------|-------------|-------------|-------------|------------|------------|------------|------------|-------------|
|                         | Chimira     | Excerptr    | miRge       | Tiger       | Oasis       | Chimera     | Excerptr    | miRge       | Tiger       | Oasis       | Chimera    | Excerptr   | miRge      | Tiger      | Oasis       |
| Total Reads             | 10426434.00 | 10426434.00 | 10426434.00 | 10426434.00 | 10968327.86 | 11839204.29 | 11839204.29 | 11839204.29 | 11839204.29 | 15418341.00 | 9019201.29 | 9019201.29 | 9019201.29 | 9019201.29 | 10019001.71 |
| Host Reads              | NA          | 2107747.14  | NA          | 2671368.57  | 227035.29   | NA          | 2122452.29  | NA          | 2896888.43  | 992068.71   | NA         | 4205631.57 | NA         | 7841642.71 | 1596410.14  |
| Host smallRNA reads     | NA          | NA          | NA          | 2567869.57  | NA          | NA          | NA          | NA          | 2599891.43  | NA          | NA         | NA         | NA         | 7151785.43 | NA          |
| miRNA total reads       | 311143.29   | 238433.51   | 237243.86   | 238748.86   | 203566.14   | 1210229.43  | 919625.98   | 987899.29   | 953958.71   | 826859.00   | 1631118.71 | 1597330.10 | 1596855.29 | 1604115.57 | 1514686.29  |
| miRNA > 10RPM           | 106.29      | 88.14       | 87.86       | 91.57       | 89.14       | 163.71      | 133.29      | 149.71      | 139.00      | 135.00      | 178.57     | 159.57     | 163.86     | 163.14     | 150.14      |
| miRNA > 100RPMM         | 138.71      | 120.00      | 112.29      | 124.00      | 168.57      | 179.43      | 158.29      | 162.00      | 162.86      | 249.86      | 154.29     | 139.00     | 142.71     | 143.71     | 355.57      |
| miR-22-3p RPM           | 43.11       | 42.52       | 43.09       | 43.11       | 41.40       | 276.24      | 264.33      | 276.97      | 271.74      | 207.36      | 328.99     | 307.15     | 318.58     | 317.81     | 279.86      |
| miR-22-3p RPMM          | 1043.15     | 1339.40     | 1359.56     | 1350.37     | 42408.36    | 3070.00     | 3877.86     | 3912.65     | 3854.52     | 93608.02    | 2197.62    | 2061.37    | 2179.87    | 2163.78    | 58113.52    |
| miR-92a-3p RPM          | 1345.89     | 1291.03     | 1348.61     | 1317.49     | 1236.91     | 2979.72     | 2874.46     | 3032.06     | 2939.68     | 2284.63     | 1864.67    | 1777.16    | 1773.96    | 1818.32    | 1474.35     |
| miR-92a-3p RPMM         | 44542.21    | 55360.51    | 59004.65    | 57211.06    | 1229114.81  | 43031.09    | 56916.75    | 56626.52    | 55908.95    | 1059615.05  | 11493.81   | 11117.11   | 11211.06   | 11394.13   | 341504.14   |
| lncDR total reads       | NA          | 3902.90     | NA          | 7784.57     | NA          | NA          | 8537.44     | NA          | 9543.43     | NA          | NA         | 13335.29   | NA         | 5166.43    | NA          |
| snoDR total reads       | NA          | 16173.78    | NA          | 22021.71    | 870.29      | NA          | 11267.87    | NA          | 15443.86    | 5718.57     | NA         | 602487.35  | NA         | 1113487.71 | 3194.14     |
| snDR total reads        | NA          | 25489.81    | NA          | 25355.57    | 1017.86     | NA          | 106257.72   | NA          | 107456.71   | 8121.00     | NA         | 21608.42   | NA         | 22817.43   | 421.29      |
| snDR > 100 RPMsnDR      | NA          | NA          | NA          | 53.71       | NA          | NA          | NA          | NA          | 58.86       | NA          | NA         | NA         | NA         | 96.43      | NA          |
| tDR total reads         | NA          | 1621821.29  | NA          | 1455182.43  | NA          | NA          | 535736.00   | NA          | 486575.00   | NA          | NA         | 517326.14  | NA         | 402458.86  | NA          |
| tDR > 100 RPMtDR        | NA          | 11.86       | NA          | 18.57       | NA          | NA          | 17.00       | NA          | 33.86       | NA          | NA         | 22.00      | NA         | 41.71      | NA          |
| rDR total reads         | NA          | 1026293.14  | NA          | 797402.57   | 531.86      | NA          | 1394877.86  | NA          | 990736.14   | 3347.86     | NA         | 4365498.71 | NA         | 3947849.86 | 994.14      |
| rDR > 100 RPMrDR        | NA          | NA          | NA          | 17.43       | NA          | NA          | NA          | NA          | 18.71       | NA          | NA         | NA         | NA         | 13.43      | NA          |
| piRNA total reads       | NA          | 2281.14     | NA          | NA          | 10572.86    | NA          | 5655.00     | NA          | NA          | 65242.43    | NA         | 40670.86   | NA         | NA         | 7888.57     |
| misc_RNA total reads    | NA          | 20073.65    | NA          | 15971.86    | NA          | NA          | 23336.43    | NA          | 28885.29    | NA          | NA         | 33462.51   | NA         | 51100.00   | NA          |
| other ncRNA total reads | NA          | NA          | 1117470.71  | NA          | NA          | NA          | NA          | 2162839.43  | NA          | NA          | NA         | NA         | 5609577.14 | NA         | NA          |
| mRNA total reads        | NA          | NA          | 14140.71    | NA          | NA          | NA          | NA          | 76421.29    | NA          | NA          | NA         | NA         | 150147.71  | NA         | NA          |
| Nonhost reads           | NA          | NA          | NA          | 3630707.71  | NA          | NA          | NA          | NA          | 3856228.71  | NA          | NA         | NA         | NA         | 39649.00   | NA          |
| % assigned              | 0.03        | 0.21        | 0.13        | 0.60        | 0.02        | 0.09        | 0.17        | 0.24        | 0.57        | 0.05        | 0.16       | 0.46       | 0.81       | 0.87       | 0.15        |

$\log_{10}$  Base Mean • 2 • 4 • 6

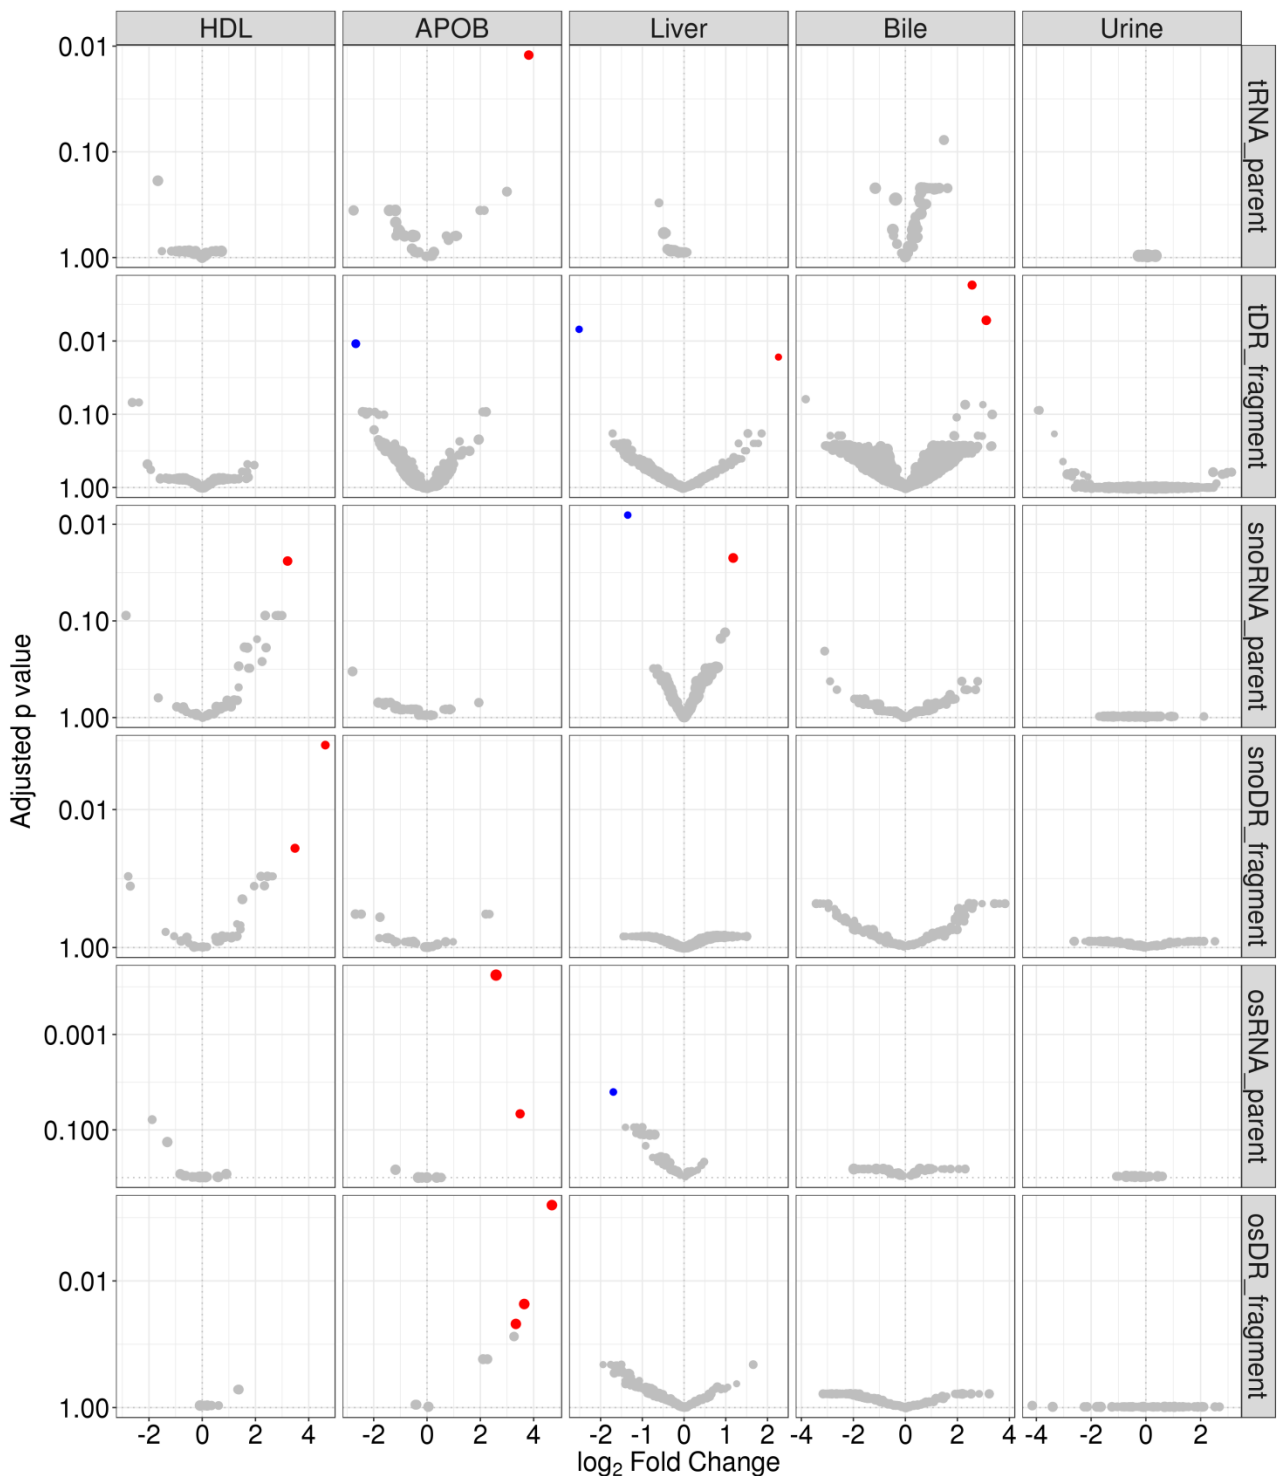

**Figure 9-Figure Supplement 1. SR-BI does not regulate lipoprotein tDRs or snoDRs.** Differential expression analysis by DESeq2. Volcano plots of demonstrating significant (adjusted  $p > 0.05$ ) differential ( $> 1.5$ -absolute fold change) abundances for tDR, snoDRs, and other sRNAs (osDRs a.k.a. miscellaneous RNAs) at the parent and individual fragment levels - red, increased; blue, decreased. WT, wild-type mice; SR-BI KO, Scavenger receptor BI Knockout mice (*Scarb1*<sup>-/-</sup>). HDL WT, N=7; HDL SR-BI KO N=7; APOB WT, N=7, APOB SR-BI KO N=7; Liver WT, N=7; Liver SR-BI KO, N=7; Bile WT, N=7; Bile SR-BI KO, N=6; Urine WT, N=5; Urine SR-BI KO, N=6.

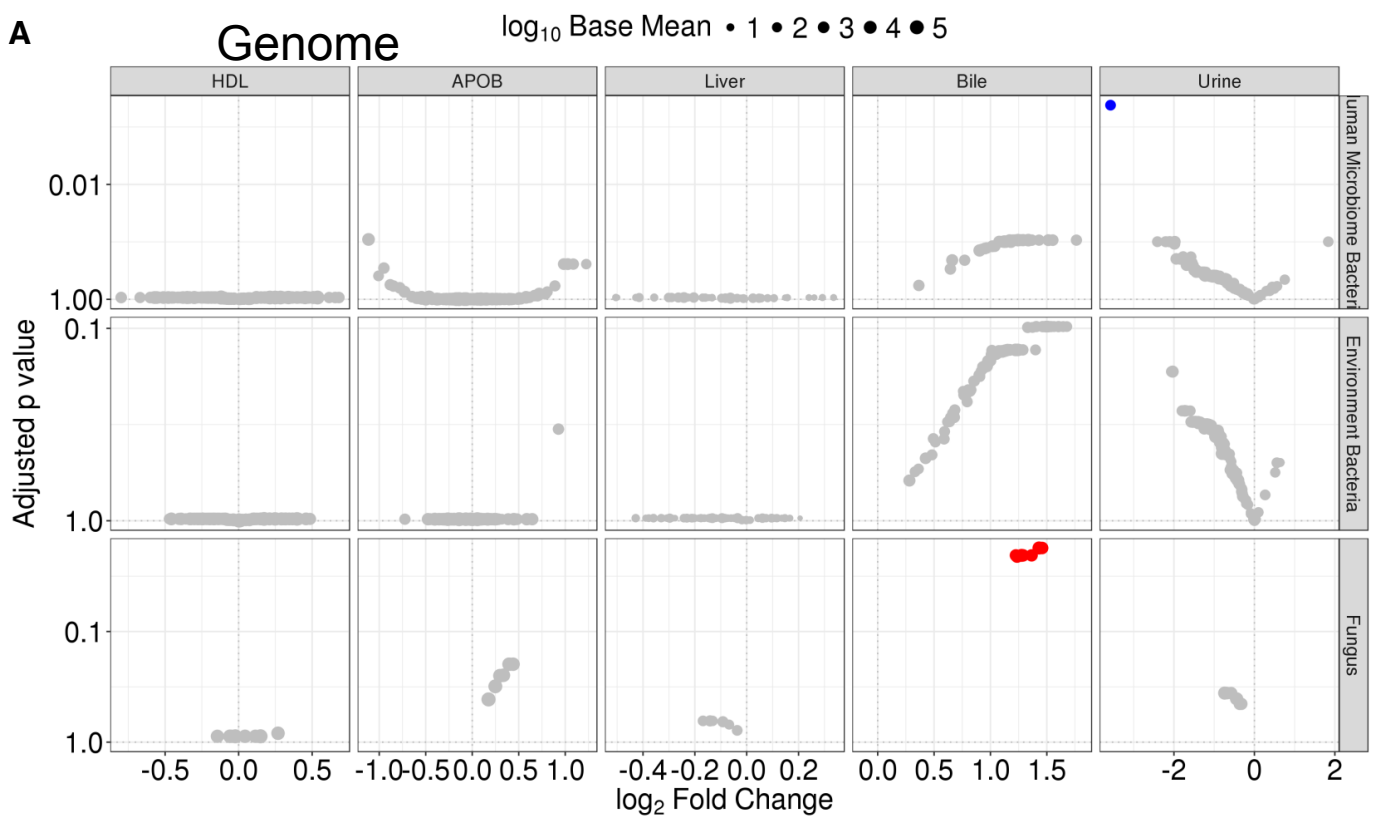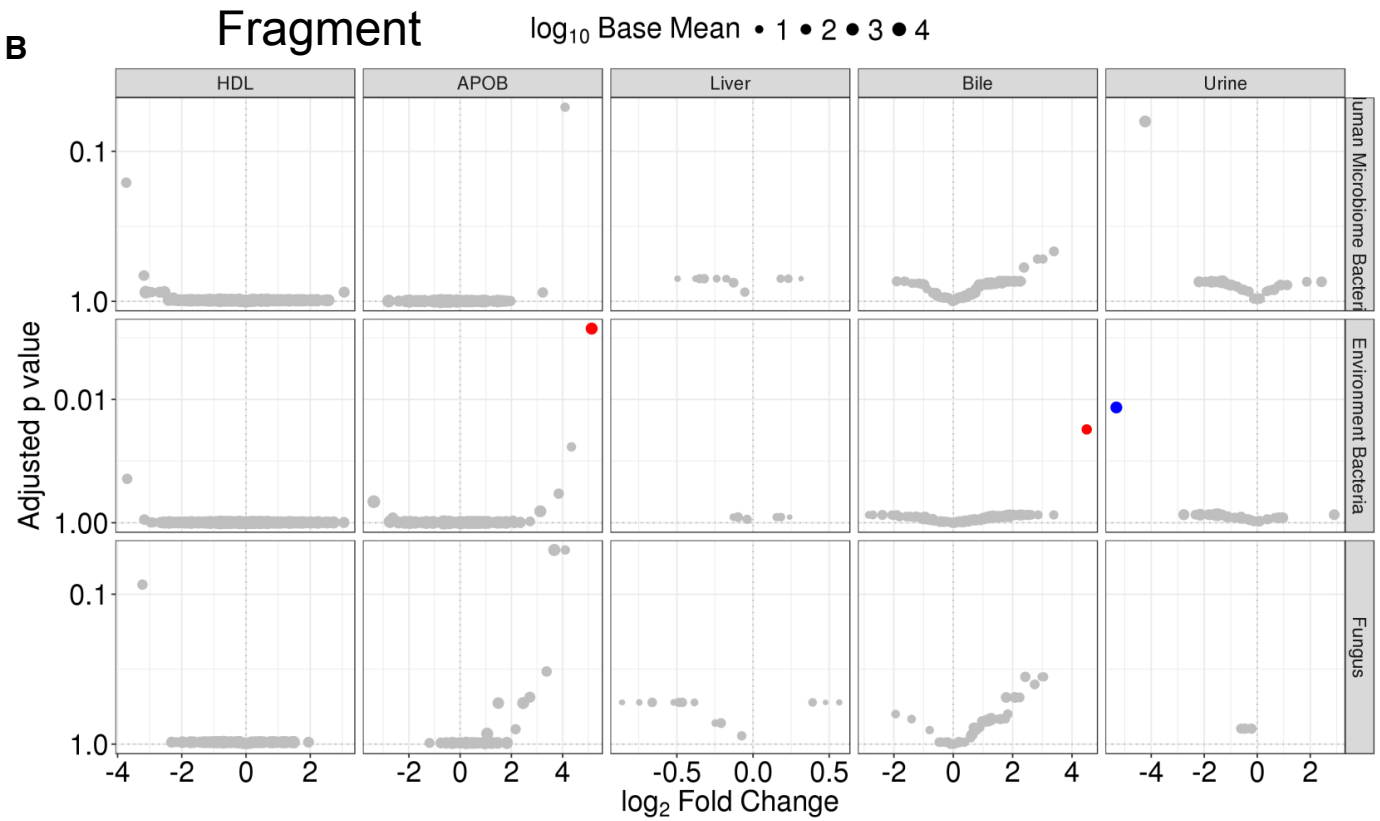

**Figure 9-Figure Supplement 2. SR-BI regulates fungal sRNAs in bile.** Differential expression analysis by DESeq2. Volcano plots demonstrating significant (adjusted  $p > 0.05$ ) differential ( $> 1.5$ -absolute fold change) abundances for non-host bacterial and fungal sRNAs at the (A) genome and (B) individual fragment levels - red, increased; blue, decreased. WT, wild-type mice; SR-BI KO, Scavenger receptor BI Knockout mice (*Scarb1*<sup>-/-</sup>). HDL WT, N=7; HDL SR-BI KO N=7; APOB WT, N=7; APOB SR-BI KO N=7; Liver WT, N=7; Liver SR-BI KO, N=7; Bile WT, N=7; Bile SR-BI KO, N=6; Urine WT, N=5; Urine SR-BI KO, N=6.

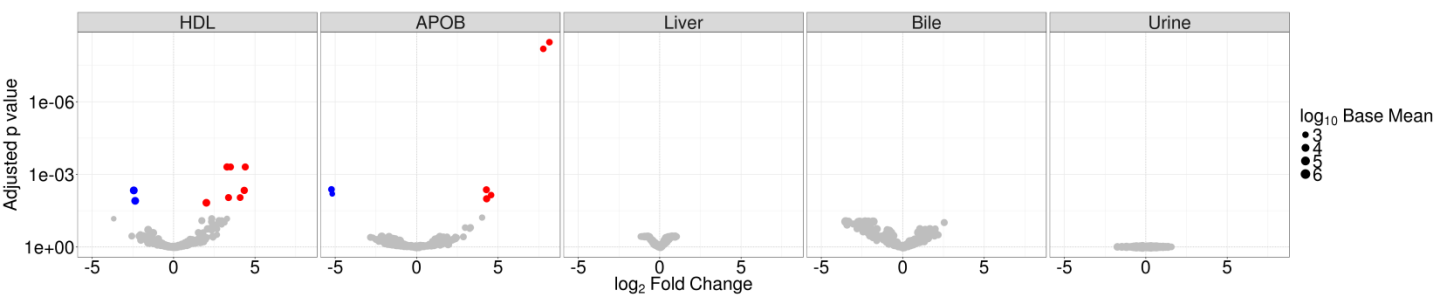

**Figure 9-Figure Supplement 3. SR-BI regulates the top most abundant sRNAs on lipoproteins.** Differential expression analysis by DESeq2. Volcano plots of demonstrating significant (adjusted  $p > 0.05$ ) differential ( $>1.5$ -absolute fold change) abundances for the top most abundant (collective top 100 non-redundant) sRNAs at the independent of class and contributing species between wild-type (WT) and Scavenger receptor BI Knockout mice (*Scarb1*<sup>-/-</sup>) (SR-BI KO) mice - red, increased; blue, decreased. HDL WT, N=7; HDL SR-BI KO N=7; APOB WT, N=7, APOB SR-BI KO N=7; Liver WT, N=7; Liver SR-BI KO, N=7; Bile WT, N=7; Bile SR-BI KO, N=6; Urine WT, N=5; Urine SR-BI KO, N=6.



**Figure 9-Source Data 1. DEseq2 comparison of sRNA changes at the parent level in SR-BI KO vs. WT mice**

| <b>Group</b> | <b>Class</b> | <b>Gene</b>       | <b>FoldChange</b> | <b>pvalue</b> | <b>padj</b> | <b>ENSEMBL</b>       |
|--------------|--------------|-------------------|-------------------|---------------|-------------|----------------------|
| APOB         | osRNA        | misc_RNA:Vaultrc5 | 6.02              | 5.18E-06      | 5.70E-05    | ENSMUSG00000065145.1 |
| APOB         | osRNA        | lincRNA:Malat1    | 11.25             | 8.39E-03      | 4.61E-02    | ENSMUSG00000092341.2 |
| APOB         | tDR          | AsnGTT            | 14.09             | 3.92E-04      | 1.22E-02    |                      |
| Bile         | snDR         | Gm24621           | 4.95              | 4.04E-04      | 2.99E-02    | ENSMUSG00000064613.1 |
| HDL          | miRNA        | mmu-miR-143-3p    | 0.20              | 2.60E-06      | 4.26E-04    |                      |
| HDL          | snDR         | Gm25587           | 3.54              | 9.03E-04      | 2.92E-02    | ENSMUSG00000064432.1 |
| HDL          | snDR         | Gm22866           | 3.81              | 9.28E-04      | 2.92E-02    | ENSMUSG00000065881.1 |
| HDL          | snoDR        | Snord22           | 9.23              | 3.53E-04      | 2.40E-02    | ENSMUSG00000065087.1 |
| Liver        | osRNA        | lincRNA:Gm26904   | 0.31              | 3.04E-04      | 1.61E-02    | ENSMUSG00000097560.1 |
| Liver        | snDR         | Gm23686           | 0.43              | 4.33E-04      | 2.38E-02    | ENSMUSG00000096391.1 |
| Liver        | snoDR        | Gm22270           | 0.39              | 2.71E-05      | 8.04E-03    | ENSMUSG00000077222.1 |
| Liver        | snoDR        | Snord64           | 2.26              | 1.50E-04      | 2.23E-02    | ENSMUSG00000077191.1 |
| Urine        | rDR          | n-R5s2            | 0.19              | 8.88E-04      | 3.28E-02    | ENSMUSG00000075918.1 |

Figure 9-Source Data 2. DEseq2 comparison of sRNA changes at the fragment level in SR-BI KO vs. WT mice

| Group | Class | Sequence                                                    | Length | FoldChange | pvalue   | padj     |
|-------|-------|-------------------------------------------------------------|--------|------------|----------|----------|
| HDL   | miRNA | TGAGATGAAGCACTGTAGCTC                                       | 21     | 0.19       | 1.03E-06 | 4.71E-04 |
| HDL   | miRNA | AAAGCTGGGTTGAGAGGGC                                         | 19     | 0.05       | 1.38E-06 | 4.71E-04 |
| HDL   | miRNA | TAAGTCACTAGTGTTCCGTT                                        | 21     | 0.06       | 4.21E-06 | 9.62E-04 |
| HDL   | miRNA | TGAGATGAAGTACTGTAGCTC                                       | 21     | 0.09       | 1.46E-05 | 2.51E-03 |
| HDL   | miRNA | TGAGATGAAGCACTGTAGCTCA                                      | 22     | 0.12       | 1.90E-05 | 2.61E-03 |
| HDL   | miRNA | AGAGATGAAGCACTGTAGCTC                                       | 21     | 0.16       | 4.84E-05 | 5.53E-03 |
| HDL   | miRNA | TTGGTCCCCCTCAACCAGCT                                        | 20     | 0.13       | 7.73E-05 | 6.21E-03 |
| HDL   | miRNA | TCAGATGAAGCACTGTAGCTC                                       | 21     | 0.15       | 8.39E-05 | 6.21E-03 |
| HDL   | miRNA | TTCACAGTGGCTAAGTTCTGC                                       | 21     | 0.12       | 8.94E-05 | 6.21E-03 |
| HDL   | miRNA | TGAGGTAGTAGATTGTATA                                         | 19     | 0.08       | 9.06E-05 | 6.21E-03 |
| HDL   | miRNA | TGAGGTAGTAGTTGTGCT                                          | 19     | 0.08       | 1.19E-04 | 7.43E-03 |
| HDL   | miRNA | TGACATGAAGCACTGTAGCTC                                       | 21     | 0.19       | 1.85E-04 | 1.06E-02 |
| HDL   | miRNA | TGAGATGAAGCACTGTGGCTC                                       | 21     | 0.18       | 3.09E-04 | 1.63E-02 |
| HDL   | miRNA | GAGATGAAGCACTGTAGCTC                                        | 20     | 0.09       | 3.34E-04 | 1.63E-02 |
| HDL   | miRNA | TAGCTTATCAGACTGATGTT                                        | 20     | 0.14       | 4.05E-04 | 1.85E-02 |
| HDL   | miRNA | TGAGATGAAGCACTGTAGC                                         | 19     | 0.16       | 4.67E-04 | 1.97E-02 |
| HDL   | miRNA | TTCACAGTGGCTAAGTT                                           | 17     | 0.10       | 4.89E-04 | 1.97E-02 |
| HDL   | miRNA | TGAGATGAAGCACCGTAGCTC                                       | 21     | 0.18       | 7.76E-04 | 2.95E-02 |
| HDL   | miRNA | TTGTTCCGTTCCGCTCGCGTGA                                      | 21     | 0.11       | 9.42E-04 | 3.40E-02 |
| HDL   | miRNA | TGAGATGAAGCACTGTAGCTC                                       | 21     | 0.21       | 1.10E-03 | 3.77E-02 |
| HDL   | miRNA | TGAGATGAAGCACTGTATCTC                                       | 21     | 0.23       | 1.32E-03 | 4.31E-02 |
| HDL   | miRNA | GCACTGAGATGGGAGTGGTG                                        | 20     | 8.24       | 1.38E-03 | 4.31E-02 |
| APOB  | miRNA | AGAGGTAGTAGTTGCATA                                          | 19     | 9.93       | 2.06E-05 | 8.02E-03 |
| APOB  | miRNA | ATCACATTGCCAGGGATTACCA                                      | 22     | 9.41       | 1.01E-04 | 1.97E-02 |
| Bile  | miRNA | ATCACATTGCCAGGGATTACCA                                      | 22     | 0.08       | 1.49E-04 | 3.32E-02 |
| HDL   | snDR  | GCGGGAAACTCGACTGCATAATTTGTGGTAGTGGGGACCGCGTTCGCGCTCTCCCCTG  | 59     | 7.22       | 2.08E-06 | 3.56E-04 |
| HDL   | snDR  | GCGGGAAACTCGACTGCATAATTTGTGGTAGTGGGGACTGCGTTCGCGCTCTCCCCTG  | 59     | 6.26       | 8.01E-06 | 6.84E-04 |
| HDL   | snDR  | GCGGGAAACTCGGCTGCATAATTTGTGGTAGTGGGGACTGCGTTCGCGCTCTCCCCTG  | 59     | 5.70       | 1.70E-05 | 7.92E-04 |
| HDL   | snDR  | GCGGGAAACTCGACTGCATAATTTGTGGTAGTGGGGACTGCGTTCGCGCTCTCCCCTG  | 59     | 5.21       | 1.85E-05 | 7.92E-04 |
| HDL   | snDR  | GCGGGAAACTCGACTGCATAATTTGTGGTAGTGGGGACTGCGTTCGCGCTCTCCCCTG  | 59     | 6.75       | 9.59E-05 | 3.28E-03 |
| HDL   | snDR  | GCGGGAAACTCGACTGAATAATTTGTGGTAGTGGGGACTGCGTTCGCGCTCTCCCCTG  | 59     | 4.21       | 2.12E-04 | 5.12E-03 |
| HDL   | snDR  | ACGGGAAACTCGACTGCATAATTTGTGGTAGTGGGGACTGCGTTCGCGCTCTCCCCTG  | 59     | 4.51       | 2.38E-04 | 5.12E-03 |
| HDL   | snDR  | GCGGGAAACTCGACTGCACAATTTGTGGTAGTGGGGACTGCGTTCGCGCTCTCCCCTG  | 59     | 5.64       | 2.43E-04 | 5.12E-03 |
| HDL   | snDR  | GCGGGAAACTCGACTGCATAATTTGTGGTAGTGGGGACTGCGTTCGCGCTCTCCCCTG  | 59     | 4.29       | 2.69E-04 | 5.12E-03 |
| HDL   | snDR  | GCGGGAAACTCGACTGCATAATTTGTGATAGTGGGGACTGCGTTCGCGCTCTCCCCTG  | 59     | 4.92       | 3.03E-04 | 5.19E-03 |
| HDL   | snDR  | GCGGGAAACTCGACTGCATAATTTGCGGTAGTGGGGACTGCGTTCGCGCTCTCCCCTG  | 59     | 4.14       | 3.83E-04 | 5.58E-03 |
| HDL   | snDR  | GCGGGAAACTCGACTGCATAATTTGTGGTAGTGGGGACTGCGTTCGCGCTCTCCCCTG  | 59     | 5.84       | 3.92E-04 | 5.58E-03 |
| HDL   | snDR  | GCGGGAAACTCGACTGCATAATTTGTGGTAGTGGAGGACTGCGTTCGCGCTCTCCCCTG | 59     | 4.31       | 6.02E-04 | 7.74E-03 |
| HDL   | snDR  | GCGGGAAACTCGACTGCATAATTTGTGGTAGTGGGGACTGCGTTCGCGCTCTCCCCTG  | 59     | 3.84       | 6.33E-04 | 7.74E-03 |
| HDL   | snDR  | GCGGGAAACTCGACTGCATAATTTGTGGTAGTGGGGACTGCGTTCGCGCTCTCCCCTG  | 59     | 3.61       | 7.57E-04 | 8.31E-03 |
| HDL   | snDR  | GCGGGAAACTCGACCGCATAATTTGTGGTAGTGGGGACTGCGTTCGCGCTCTCCCCTG  | 59     | 5.15       | 7.93E-04 | 8.31E-03 |
| HDL   | snDR  | GCGGGAAACTCGACTGCATAATTTGTGGCAGTGGGGACTGCGTTCGCGCTCTCCCCTG  | 59     | 4.20       | 8.26E-04 | 8.31E-03 |
| HDL   | snDR  | GCGGGAAACTCGACTGCATAATTTGTGGTAGTGGGGACTGCGTTCGCGCTCTCCCCTG  | 59     | 4.37       | 9.41E-04 | 8.66E-03 |
| HDL   | snDR  | GCGGGAAACTCGACTGCATAATTTGTGGTAGTGGGGACTGCGTTCGCGCTCTCCCCTG  | 59     | 3.92       | 9.62E-04 | 8.66E-03 |
| HDL   | snDR  | GCGGGAAACTCGACTGCATAATTTGTGGTAGTGGGGACTGCGTTCGCGCTCTCCCCTG  | 59     | 3.55       | 1.15E-03 | 9.82E-03 |
| HDL   | snDR  | GCGGGAAACTCGACTGCATAATTTGTGGTAGTGGGGACTGCGTTCGCGCTCTCCCCTG  | 59     | 4.19       | 1.60E-03 | 1.12E-02 |
| HDL   | snDR  | GCGGGAAACTCACTGCATAATTTGTGGTAGTGGGGACTGCGTTCGCGCTCTCCCCTG   | 59     | 3.76       | 1.61E-03 | 1.12E-02 |
| HDL   | snDR  | GCGGGAAACTCGACTGCATAATTTGTGGTAGTGGGGACTGCGTTCGCGCTCTCCCCTG  | 59     | 3.94       | 1.64E-03 | 1.12E-02 |
| HDL   | snDR  | GCGGGAAACCAGACTGCATAATTTGTGGTAGTGGGGACTGCGTTCGCGCTCTCCCCTG  | 59     | 3.58       | 1.66E-03 | 1.12E-02 |
| HDL   | snDR  | GCGGGAAACTCGACTGCATAATTTGTGGTAGTGGGGACTGCGTTCGCGCTCTCCCCTG  | 59     | 4.00       | 1.66E-03 | 1.12E-02 |
| HDL   | snDR  | GCGGGAAACTCGACTGCATAATTTGTGGTAGTGGGGACTGCGTTCGCGCTCTCCCCTG  | 59     | 3.88       | 1.71E-03 | 1.12E-02 |
| HDL   | snDR  | GCGGGAAACTCGACTGCATAATTTGTGGTAGTGGGGACTGCGTTCGCGCTCTCCCCTG  | 57     | 3.12       | 1.80E-03 | 1.13E-02 |
| HDL   | snDR  | GCGGGAAACTCGACTGCATAATTTGTGGTAGTGGGGACTGCGTTCGCGCTCTCCCCTG  | 59     | 3.29       | 1.85E-03 | 1.13E-02 |
| HDL   | snDR  | GCGGGAAACTCGACTGCATAATTTGTAGTAGTGGGGACTGCGTTCGCGCTCTCCCCTG  | 59     | 3.17       | 1.94E-03 | 1.15E-02 |
| HDL   | snDR  | ATAATTTGTGGTAGTGGGG                                         | 19     | 6.58       | 2.23E-03 | 1.26E-02 |
| HDL   | snDR  | GCTGGAACCTCGACTGCATAATTTGTGGTAGTGGGGACTGCGTTCGCGCTCTCCCCTG  | 59     | 4.01       | 2.29E-03 | 1.26E-02 |
| HDL   | snDR  | GCGGGAAACTCGACTGCATAATTTGTGGTAGTGGGGACTGCGTTCGCGCTCTCCCCTG  | 59     | 3.67       | 2.72E-03 | 1.45E-02 |
| HDL   | snDR  | GNGGGAAACTCGACTGCATAATTTGTGGTAGTGGGGACTGCGTTCGCGCTCTCCCCTG  | 59     | 4.14       | 3.23E-03 | 1.67E-02 |
| HDL   | snDR  | GCGGGAAACTCGACTGCATAATTTGTGGTAGTGGGGACTGCGTTCGCGCTCTCCCCTG  | 59     | 3.53       | 5.80E-03 | 2.88E-02 |
| HDL   | snDR  | GCGGGAACTCGACTGCATAATTTGTGGTAGTGGGGACTGCGTTCGCGCTCTCCCCTG   | 59     | 3.12       | 6.18E-03 | 2.88E-02 |
| HDL   | snDR  | GCGGGAAACTCGACTGCATAATTTGTGGTAGTGGGGACTGCGTTCGCGCTCTCCCCTG  | 59     | 3.48       | 6.21E-03 | 2.88E-02 |
| HDL   | snDR  | GTGGGAAACTCGACTGCATAATTTGTGGTAGTGGGGACTGCGTTCGCGCTCTCCCCTG  | 59     | 2.87       | 6.28E-03 | 2.88E-02 |
| HDL   | snDR  | GCGGGAAACTCGACTGCATAATTTGTGGTAGTGGGGACTGCGTTCGCGCTATCCCCTG  | 59     | 2.71       | 6.46E-03 | 2.88E-02 |
| HDL   | snDR  | GCGGGAAACTCGACTGCATAATTTGTGGTAGTGGGGACTGCGTTCGCGCTCTCCCCTG  | 59     | 4.34       | 6.57E-03 | 2.88E-02 |
| HDL   | snDR  | GCGGGAAACTCGACTGCATAATTTGTGGTAGTGGGGACTGCGTTCGCGCTACCCCCTG  | 59     | 2.96       | 6.75E-03 | 2.89E-02 |
| HDL   | snDR  | GCAGGAAACTCGACTGCATAATTTGTGGTAGTGGGGACTGCGTTCGCGCTCTCCCCTG  | 59     | 4.32       | 7.32E-03 | 3.04E-02 |
| HDL   | snDR  | GCGGGAAACTCGACTGCATAATTTGTGGTAGTGGGGACTGCGTTCGCGCTCTCCCCTG  | 59     | 3.42       | 7.47E-03 | 3.04E-02 |
| HDL   | snDR  | GCGGGAAACTCGACTGCATAATTTGTGGTAGTGGGGACTGCGTTCGCGCTCTCCCCTG  | 59     | 2.98       | 8.85E-03 | 3.42E-02 |
| HDL   | snDR  | GCGGGAAACTCGACTGCATAATTTGTGGTAGTGGGGACTGCGTTCGCTCTCCCCTG    | 59     | 3.27       | 8.90E-03 | 3.42E-02 |
| HDL   | snDR  | GCGGGAAACTCGACTGCATAATTTGTGGTAGTGGGGACTGCGTTCGCGCTCTCCCCTG  | 59     | 2.78       | 9.00E-03 | 3.42E-02 |
| HDL   | snDR  | GCGGGAAACTCGACTGCATAATTTGTGGTAGTGGGGACTGCGTTCGCGCTCTCCCCTG  | 59     | 4.07       | 9.41E-03 | 3.50E-02 |
| HDL   | snDR  | GCGGGAAACTCGACTGCATAATTTGTGGTAGTGGGGACTGCGTTCGCGCTCTCCCCTG  | 59     | 2.65       | 1.01E-02 | 3.66E-02 |
| HDL   | snDR  | GCGGGAAACTCGACTGCATAATTTGTGGTAGTGGGGACTGCGTTCGCGCTCTCCCCTG  | 59     | 2.87       | 1.04E-02 | 3.70E-02 |
| HDL   | snDR  | GCGGGAAACTCGACTGCATAATTTGTGGTAGTGGGGACTGCGTTCGCGCTCTCCCCTG  | 59     | 2.63       | 1.19E-02 | 4.07E-02 |
| HDL   | snDR  | GCGGGAAACTCGACTGCATAATTTGTGGTAGTGGGGACTGCGTTCGCGCTCTCCCCTG  | 59     | 2.74       | 1.20E-02 | 4.07E-02 |
| HDL   | snDR  | GCGGGAAACTCGACTGCATAATTTGTGGTAGTGGGGACTGCGTTCGCGCTCTCCCCTG  | 58     | 5.57       | 1.21E-02 | 4.07E-02 |
| HDL   | snDR  | GCGGGAAACTCGTCTGCATAATTTGTGGTAGTGGGGACTGCGTTCGCGCTCTCCCCTG  | 59     | 2.88       | 1.37E-02 | 4.49E-02 |
| HDL   | snDR  | GCGGGAAACTCGACTGCATAATTTGTGGTAGTGGGGACTGCGTTCGCGCTCTCCCCTG  | 59     | 2.60       | 1.45E-02 | 4.61E-02 |

|       |         |                                                               |    |       |          |          |
|-------|---------|---------------------------------------------------------------|----|-------|----------|----------|
| HDL   | snDR    | GGGAACTCGACTGCATAATTTGTGGTAGTGGGGACTGCGTTAGCGCTCTCCCCTG       | 57 | 2.36  | 1.46E-02 | 4.61E-02 |
| HDL   | snDR    | GCGGGAGACTCGACTGCATAATTTGTGGTAGTGGGGACTGCGTTGCGCTCTCCCCTG     | 59 | 2.61  | 1.54E-02 | 4.79E-02 |
| HDL   | snDR    | GCGGGAACTCGACTGCATAATTTGTGGTAGAGGGGGACTGCGTTGCGCTCTCCCCTG     | 59 | 2.58  | 1.60E-02 | 4.85E-02 |
| HDL   | snDR    | GCGGGAACTCGACTGCATAATTTGTGGTAGTGGGGACTGCGTTGCGCTCTCCCCTG      | 59 | 2.72  | 1.62E-02 | 4.85E-02 |
| APOB  | snDR    | AGTCGGCATTGGCAATTTTGACAGTCTCTACGGAGACTG                       | 40 | 28.09 | 2.59E-03 | 2.85E-02 |
| Liver | snDR    | AGTGGGGACTGCGTTGCGCTCTCCCCTG                                  | 30 | 0.11  | 1.38E-05 | 4.16E-03 |
| Liver | snDR    | TTTTTGAGGCCTTGCTTGACAAGGCT                                    | 27 | 0.13  | 6.82E-05 | 1.03E-02 |
| Liver | snDR    | AATTTTTGAGGCCTTGCTTGACAAGGCT                                  | 30 | 0.17  | 2.48E-04 | 2.00E-02 |
| Liver | snDR    | AATTTTTGAGGTCCTGCTCGTGCAAGGCT                                 | 30 | 0.17  | 3.01E-04 | 2.00E-02 |
| Liver | snDR    | CAATTTTTGAGGCCTTGCTTGACAAGGCT                                 | 31 | 0.16  | 3.72E-04 | 2.00E-02 |
| Liver | snDR    | CAATTTTTGAGGTCCTGCTCGTGCAAGGCT                                | 31 | 0.19  | 4.34E-04 | 2.00E-02 |
| Liver | snDR    | TTTTTGAGGTCCTGCTCGTGCAAGGCT                                   | 27 | 0.18  | 4.64E-04 | 2.00E-02 |
| Liver | snDR    | GTGGTAGTGGGGACTGCGTTGCGCTCTCCCCTG                             | 35 | 0.21  | 7.07E-04 | 2.67E-02 |
| Liver | snDR    | TTGTGGTAGTGGGGACTGCGTTGCGCTCTCCCCTA                           | 37 | 0.22  | 1.08E-03 | 3.61E-02 |
| Liver | snDR    | GTAGTGGGGACTGCGTTGCGCTCTCCCCTG                                | 32 | 0.23  | 1.39E-03 | 3.82E-02 |
| Liver | snDR    | AATTTTTGAGGCCTTGTTTCGGCAAGGCT                                 | 30 | 0.22  | 1.39E-03 | 3.82E-02 |
| Liver | snDR    | TTAAACCAATTTTTGAGGCCTTGTTTCGGCAAGGCT                          | 37 | 0.23  | 1.77E-03 | 4.45E-02 |
| Liver | snDR    | ACCCGCCTACTTTGCGGGATGCCTGGGTACGCGATCTGCCCG                    | 43 | 0.23  | 2.21E-03 | 4.84E-02 |
| Liver | snDR    | TTTTTGAGGCCTTGTTTCGGCAAGGCT                                   | 27 | 0.17  | 2.24E-03 | 4.84E-02 |
| Urine | snDR    | ATGCGGGAACTCGACTGCATAATTTGTGGTAGTGGGGACTGCGTTGCGCTCTCCCCTG    | 61 | 0.03  | 1.20E-03 | 2.17E-02 |
| HDL   | rDR     | TCCCCGCGGGGCCCGCTCGTCCCCCGCGTCTGCCACCTCTTCCCCCCTCCT           | 55 | 12.97 | 1.15E-04 | 1.80E-02 |
| HDL   | rDR     | TCCCCGCGGGGCCCGCTCGTCCCCCGCGTCTGCCACCTCTTCCCCCCTCCT           | 56 | 15.82 | 5.52E-04 | 4.34E-02 |
| HDL   | rDR     | CTCGCTGCGATCTATTGAAAGTCAGCCCTCGACACAAGGGTTTGT                 | 45 | 4.15  | 1.11E-03 | 4.67E-02 |
| HDL   | rDR     | TCCCCGCGGGGCCCGCTCGTCCCCCGCGTCTGCCACCTCTTCCCCCCTCCT           | 54 | 8.80  | 1.83E-03 | 4.67E-02 |
| HDL   | rDR     | CCCCGCGGGGCCCGCTCGTCCCCCGCGTCTGCCACCTCTTCCCCCCTCCT            | 53 | 13.05 | 1.86E-03 | 4.67E-02 |
| HDL   | rDR     | GGGTCCGTGGGGTGGGGCGCGAAGCGGGCTGGGGCGCGCGCGGCT                 | 49 | 10.28 | 1.94E-03 | 4.67E-02 |
| HDL   | rDR     | GCCGGGGAGGTGGAGCACGAGCGTACGCGTTAGGACCCGAAAGA                  | 44 | 16.14 | 2.29E-03 | 4.67E-02 |
| HDL   | rDR     | CCCCGCGGGGCCCGCTCGTCCCCCGCGTCTGCCACCTCTTCCCC                  | 47 | 5.48  | 2.38E-03 | 4.67E-02 |
| APOB  | rDR     | GACTCTTAGCGGTGATCACTCGGCTCGTGCG                               | 32 | 0.02  | 1.79E-05 | 3.47E-03 |
| APOB  | rDR     | CCGCGGGGCCCGCTCGTCCCCCGCGTCTGCCACCTCT                         | 39 | 47.91 | 2.96E-05 | 3.47E-03 |
| APOB  | rDR     | TTCCCCGCGGGGCCCGCTCGTCCCCCGCGTCTGCCACCTCTTCTTCC               | 48 | 0.01  | 4.28E-05 | 3.47E-03 |
| APOB  | rDR     | CCGCGGGGCCCGCTCGTCCCCCGCGTCTGCCACCTCTTCCCCCCT                 | 49 | 30.23 | 7.00E-04 | 4.25E-02 |
| Liver | rDR     | CGCGTCTCGGGCGTGGGAAATGTGGCGTACGGAAGA                          | 35 | 0.15  | 4.21E-06 | 9.74E-03 |
| Liver | rDR     | CGCGTCTCGGGCGTGGGAAATGTGGCGTACGGAAGACC                        | 37 | 0.17  | 5.08E-06 | 9.74E-03 |
| Liver | rDR     | CGCGTCTCGGGCGTGGGAAATGTGGCGTACGGAAGACC                        | 36 | 0.19  | 2.92E-05 | 2.20E-02 |
| Liver | rDR     | GTCCCCCGCGTCTGCCACCTCTTCCCCCCTCCTTCC                          | 39 | 0.18  | 3.13E-05 | 2.20E-02 |
| Liver | rDR     | CGCGTCTCGGGCGTGGGAAATGTGGCGTACGGAAGACC                        | 51 | 0.20  | 3.71E-05 | 2.20E-02 |
| Liver | rDR     | CGCGTCTCGGGCGTGGGAAATGTGGCGTACGGAAGACC                        | 38 | 0.19  | 3.80E-05 | 2.20E-02 |
| Liver | rDR     | AGTCTGGCACGGTGAAGAGACATGAGAGGTGAGAATAAGTGGGAGGCC              | 50 | 0.19  | 4.01E-05 | 2.20E-02 |
| Liver | rDR     | CGCGTCTCGGGCGTGGGAAATGTGGCGTACGGAAGACC                        | 38 | 0.20  | 5.04E-05 | 2.42E-02 |
| Liver | rDR     | ACCGATTGGATGGTTAGTGAGGCCTCGGATCGGCCCGCGGGGTC                  | 48 | 0.20  | 7.09E-05 | 2.51E-02 |
| Liver | rDR     | TCTCTACTTGGATAACTGTGGTAATCTAGAGCTAATACATGCCGAGGGCGCTGACC      | 59 | 0.22  | 7.10E-05 | 2.51E-02 |
| Liver | rDR     | AGTTAAAAAGCTCGTAGTTGGATCTTGGGAGCGGGCGGGCGGTC                  | 45 | 0.24  | 8.23E-05 | 2.51E-02 |
| Liver | rDR     | GGGGCCGGCGGGCGGGCGGCGACTCTGGACGCGAGCC                         | 36 | 0.22  | 8.46E-05 | 2.51E-02 |
| Liver | rDR     | ACATGAGAGGTGAGAATAAGTGGGAGGCC                                 | 32 | 0.21  | 8.51E-05 | 2.51E-02 |
| Liver | rDR     | CGGGCGGGGGTCCAAACCCGCGGGGTTCCGGAGCGGGAGGAACCA                 | 48 | 0.23  | 1.51E-04 | 4.12E-02 |
| Liver | rDR     | ACGTAGCAGAGCAGCTCCCTCGTGGATCTATTGAAAGTCAGCCCTCGACACAAGGGTTTGT | 63 | 0.23  | 1.78E-04 | 4.54E-02 |
| Liver | rDR     | AAGGCTGGGTGGTGGGCTGGGGCGCGAAGCGGGGCT                          | 39 | 0.22  | 2.07E-04 | 4.95E-02 |
| Urine | rDR     | GACTCTAGTCTGGCAGGTGAAGAGACATGAGAGGTGAGAATAAGTGGGAGGCC         | 56 | 0.02  | 2.49E-05 | 4.59E-02 |
| Urine | rDR     | GCGCCGGGAGGTGGAGCACGAGCGTACGCGTTAGGACCCGAAAGAT                | 47 | 0.02  | 3.32E-05 | 4.59E-02 |
| APOB  | tDR     | TCTCTGGTGGTCTAGTGGTTAGGATTCGGCGCT                             | 33 | 0.16  | 2.90E-05 | 1.09E-02 |
| Liver | tDR     | GCCTGTACGCGGGAGACCGGGTTCGATTCGCCGACGGGGAGCC                   | 45 | 0.17  | 3.91E-06 | 6.92E-03 |
| Liver | tDR     | GCATTGGTAGTTCAATGGTAGAATTCTCGCCTCCACGCGGGTGACCCGGGTT          | 53 | 4.80  | 1.87E-05 | 1.66E-02 |
| Bile  | tDR     | GTTTCCGTAGTGTAGTGGTTATCACGCTCGCCT                             | 33 | 5.92  | 5.00E-07 | 1.72E-03 |
| Bile  | tDR     | GACCTCGTGGCGCAATGGTAGCGTCTGACT                                | 32 | 8.64  | 3.02E-06 | 5.22E-03 |
| HDL   | snoDR   | GCCCATGATGGTATGAGAGTAGTGACAGAAGGGATTTCTGAAAAACACTTTTCTGAGG    | 59 | 24.64 | 2.64E-05 | 1.16E-03 |
| HDL   | snoDR   | AGTAATGATATTTCTGGTATTCTGAGTGTCTCGCTGACGCCATCACCGAGCGGCTGACC   | 63 | 11.19 | 1.65E-03 | 3.64E-02 |
| APOB  | miscRNA | TTCGAGACCCGCGGGCGCTCCCTGGCCCTT                                | 30 | 25.70 | 7.05E-05 | 6.35E-04 |
| APOB  | miscRNA | TTCGAGACCCGCGGGCGCTCCCTGGCCCTT                                | 31 | 12.52 | 5.15E-03 | 2.32E-02 |
| APOB  | miscRNA | TTACCTAACCCGTGAGTGTGGTTTCGAGACCCGCGGGCGCTCCCTGGCCCTT          | 53 | 10.07 | 1.59E-02 | 4.78E-02 |

**Figure 9-Source Data 3. Significantly altered exogenous genome counts in SR-BI KO mice compared to WT mice.**

|       | Genome                   | Group | FoldChange | pvalue   | padj     |
|-------|--------------------------|-------|------------|----------|----------|
| HMB   | Streptomyces sp.         | Urine | 0.08       | 3.24E-06 | 4.17E-04 |
| Fungi | Aspergillus niger        | Bile  | 2.75       | 5.23E-03 | 1.76E-02 |
| Fungi | Candida albicans         | Bile  | 2.73       | 5.58E-03 | 1.76E-02 |
| Fungi | Fusarium oxysporum       | Bile  | 2.70       | 6.60E-03 | 1.76E-02 |
| Fungi | Candida glabrata         | Bile  | 2.58       | 1.03E-02 | 2.05E-02 |
| Fungi | Histoplasma capsulatum   | Bile  | 2.42       | 1.44E-02 | 2.05E-02 |
| Fungi | Saccharomyces cerevisiae | Bile  | 2.44       | 1.73E-02 | 2.05E-02 |
| Fungi | Penicillium chrysogenum  | Bile  | 2.34       | 1.79E-02 | 2.05E-02 |
| Fungi | Cryptococcus neoformans  | Bile  | 2.36       | 2.10E-02 | 2.10E-02 |

**Figure 9-Source Data 4. DEseq2 comparison of non-host bacterial sRNA changes in SR-BI KO vs. WT mice**

| Collection | Group | Sequence                                          | Length | FoldChange | pvalue   | padj     |
|------------|-------|---------------------------------------------------|--------|------------|----------|----------|
| ENV        | APOB  | TCGACGACATCAGCTGCTCCATAAGTTCCCACAC                | 34     | 35.06      | 6.02E-06 | 7.11E-04 |
| ENV        | Bile  | TTCAGCGGCGGACGGGTGAGTAATGCCTAGGAATCTGCCTGGTAGTGGG | 58     | 22.55      | 1.44E-04 | 3.07E-02 |
| ENV        | Urine | GATAGTGCGGATTCCCGTGTGAAAGTAGGTCATCGTCAGGCT        | 42     | 0.03       | 3.55E-04 | 1.35E-02 |
